# Supplementary material for: Core outcome set for preventive intervention trials in chronic and episodic migraine (COSMIG): an international, consensus-derived and multistakeholder initiative
Source: PubMed Central journal article supplement (PMC8634270; doi:10.1136/bmjopen-2020-043242), 2021-11-30
Supplement: bmjopen-2020-043242.draft_revisions.pdf [file bmjopen-2020-043242.draft_revisions.pdf]

# BMJ Open

BMJ Open is committed to open peer review. As part of this commitment we make the peer review history of every article we publish publicly available.

When an article is published we post the peer reviewers' comments and the authors' responses online. We also post the versions of the paper that were used during peer review. These are the versions that the peer review comments apply to.

The versions of the paper that follow are the versions that were submitted during the peer review process. They are not the versions of record or the final published versions. They should not be cited or distributed as the published version of this manuscript.

BMJ Open is an open access journal and the full, final, typeset and author-corrected version of record of the manuscript is available on our site with no access controls, subscription charges or pay-per-view fees (<http://bmjopen.bmj.com>).

If you have any questions on BMJ Open's open peer review process please email [info.bmjopen@bmj.com](mailto:info.bmjopen@bmj.com)

# BMJ Open

## A Core Outcome Set for Preventive Intervention Trials in Chronic and Episodic Migraine (COSMIG): An international, consensus-derived and multi-stakeholder initiative.

|                               |                                                                                                                                                                                                                                                                                                                                                                                                                                                                                                                                                                                                                                                                                                                                                                                                                                                                                                                                                                                                                                                                                                                                                                                                                                                                 |
|-------------------------------|-----------------------------------------------------------------------------------------------------------------------------------------------------------------------------------------------------------------------------------------------------------------------------------------------------------------------------------------------------------------------------------------------------------------------------------------------------------------------------------------------------------------------------------------------------------------------------------------------------------------------------------------------------------------------------------------------------------------------------------------------------------------------------------------------------------------------------------------------------------------------------------------------------------------------------------------------------------------------------------------------------------------------------------------------------------------------------------------------------------------------------------------------------------------------------------------------------------------------------------------------------------------|
| Journal:                      | <i>BMJ Open</i>                                                                                                                                                                                                                                                                                                                                                                                                                                                                                                                                                                                                                                                                                                                                                                                                                                                                                                                                                                                                                                                                                                                                                                                                                                                 |
| Manuscript ID                 | bmjopen-2020-043242                                                                                                                                                                                                                                                                                                                                                                                                                                                                                                                                                                                                                                                                                                                                                                                                                                                                                                                                                                                                                                                                                                                                                                                                                                             |
| Article Type:                 | Original research                                                                                                                                                                                                                                                                                                                                                                                                                                                                                                                                                                                                                                                                                                                                                                                                                                                                                                                                                                                                                                                                                                                                                                                                                                               |
| Date Submitted by the Author: | 12-Oct-2020                                                                                                                                                                                                                                                                                                                                                                                                                                                                                                                                                                                                                                                                                                                                                                                                                                                                                                                                                                                                                                                                                                                                                                                                                                                     |
| Complete List of Authors:     | <p>Haywood, Kirstie; University of Warwick Warwick Medical School, Warwick Research in Nursing</p> <p>Potter, Rachel; University of Warwick Warwick Medical School, Clinical Trials Unit</p> <p>Froud, Robert; Kristiania University College, Institute of Health Sciences</p> <p>Pearce, Gemma; Coventry University Department of Psychology and Behavioural Sciences</p> <p>Box, Barbara; University of Warwick Warwick Medical School, Clinical Trials Unit</p> <p>Muldoon, Lynne; University of Warwick, Clinical Trials Unit, Warwick Medical School</p> <p>Lipton, Richard; Albert Einstein College of Medicine Department of Neurology, Department of Neurology</p> <p>Petrou, Stavros; Nuffield Department of Primary Care Health Sciences,</p> <p>Rendas-Baum, Regina; QualityMetric, Outcomes Insight Consulting</p> <p>Logan, Anne-Marie; St George's University Hospitals NHS Foundation Trust</p> <p>Stewart, Kimberley; University of Warwick Warwick Medical School, Clinical Trials Unit</p> <p>Underwood, Martin; University of Warwick Warwick Medical School, Clinical Trials Unit</p> <p>Matharu, Manjit; University College London Hospitals NHS Foundation Trust National Hospital for Neurology and Neurosurgery, The Headache Group</p> |
| Keywords:                     | Migraine < NEUROLOGY, STATISTICS & RESEARCH METHODS, Clinical trials < THERAPEUTICS                                                                                                                                                                                                                                                                                                                                                                                                                                                                                                                                                                                                                                                                                                                                                                                                                                                                                                                                                                                                                                                                                                                                                                             |
|                               |                                                                                                                                                                                                                                                                                                                                                                                                                                                                                                                                                                                                                                                                                                                                                                                                                                                                                                                                                                                                                                                                                                                                                                                                                                                                 |

SCHOLARONE™  
Manuscripts

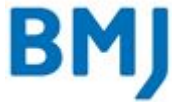

I, the Submitting Author has the right to grant and does grant on behalf of all authors of the Work (as defined in the below author licence), an exclusive licence and/or a non-exclusive licence for contributions from authors who are: i) UK Crown employees; ii) where BMJ has agreed a CC-BY licence shall apply, and/or iii) in accordance with the terms applicable for US Federal Government officers or employees acting as part of their official duties; on a worldwide, perpetual, irrevocable, royalty-free basis to BMJ Publishing Group Ltd ("BMJ") its licensees and where the relevant Journal is co-owned by BMJ to the co-owners of the Journal, to publish the Work in this journal and any other BMJ products and to exploit all rights, as set out in our [licence](#).

The Submitting Author accepts and understands that any supply made under these terms is made by BMJ to the Submitting Author unless you are acting as an employee on behalf of your employer or a postgraduate student of an affiliated institution which is paying any applicable article publishing charge ("APC") for Open Access articles. Where the Submitting Author wishes to make the Work available on an Open Access basis (and intends to pay the relevant APC), the terms of reuse of such Open Access shall be governed by a Creative Commons licence – details of these licences and which [Creative Commons](#) licence will apply to this Work are set out in our licence referred to above.

Other than as permitted in any relevant BMJ Author's Self Archiving Policies, I confirm this Work has not been accepted for publication elsewhere, is not being considered for publication elsewhere and does not duplicate material already published. I confirm all authors consent to publication of this Work and authorise the granting of this licence.

1  
2  
3  
4  
5 **A Core Outcome Set for Preventive Intervention Trials in Chronic and Episodic Migraine (COSMIG):**  
6 **An international, consensus-derived and multi-stakeholder initiative.**  
7

8  
9 Haywood KL, Potter R, Froud R, Pearce G, Box B, Muldoon L, Lipton RB, Petrou S, Rendas-Baum R,  
10 Logan A, Stewart K, Underwood M, Matharu M; on behalf of the CHES COSMIG group.  
11

12 Corresponding author: Dr Rachel Potter [r.potter@warwick.ac.uk](mailto:r.potter@warwick.ac.uk)  
13  
14  
15  
16  
17

18 **Main Text (3,651/4000)**

19 Figure 1. Flow diagram outlining the development stages for the COSMIG

20 Figure 2. COSMIG: Core Outcome Set for Episodic and Chronic MIGraine.  
21  
22

23 Table 1. Delphi Round 1 Shortlisted domains

24 Table 2a. Delphi Round 2. Results of domain prioritisation for Episodic Migraine (combined panels)

25 Table 2b. Delphi Round 2. Results of domain prioritisation for Chronic Migraine (combined panels)

26 Table 3. Delphi Round 3. Results of voting for domains for episodic and chronic migraine

27 Table 4. Consensus meeting: results from small and large group discussions and voting.  
28

29 **Appendix**

30 Appendix Table 1. Grading system

31 Appendix Table 2. Delphi participants - professional background

32 Appendix Table 3. Delphi Round 3. Results of voting on sub-panel discrepancies.  
33  
34  
35  
36  
37  
38  
39  
40  
41  
42  
43  
44  
45  
46  
47  
48  
49  
50  
51  
52  
53  
54  
55  
56  
57  
58  
59  
60

**ABSTRACT** (249//300 words)

Objective: Typically, migraine prevention trials focus on reducing migraine days. This narrow focus may not capture all that is important to people with migraine. Inconsistency in outcome selection across trials limits the potential for data pooling and evidence synthesis. In response, we describe the development of core outcome set for migraine (COSMIG).

Design: A two-stage approach sought to achieve international, multi-stakeholder consensus on both the core domain set (CDS) and core measurement set (CMS). Following construction of a comprehensive list of outcomes, expert panellists (patients, healthcare professionals and researchers) completed a three-round electronic-Delphi study to support a reduction and prioritisation of core domains and outcomes. Participants in a consensus meeting finalised the core domains and methods of assessment. All stages were overseen by an international core team, including patient research partners.

Results: There was good representation of patients (episodic (n=34) and chronic migraine (n=42)) and healthcare professionals (n=33) with high response and retention rates. The initial list of domains and outcomes was reduced from >50 to seven core domains for consideration in the consensus meeting, during which a two-domain core outcome set was agreed.

Conclusion: International and multi-stakeholder consensus emerged to describe a two-domain core outcome set for reporting research on preventive interventions for chronic and episodic migraine: migraine-specific pain and migraine-specific quality of life. Intensity of migraine-pain assessed with an 11-point numerical rating scale and the frequency as the number of headache/migraine days over a specified time-period. Migraine-specific quality of life assessed using the Migraine Functional Impact Questionnaire.

**Strengths and limitations of this study:**

- The research process and validity of results are strengthened by the co-collaboration with patient research partners throughout all stages of the research.
- A bespoke grading system to support the prioritisation of outcome domains between stakeholder groups (expert panels) is described.
- International, multi-stakeholder participation – patients, researchers and a range of health professionals - in the on-line Delphi survey.
- Expert panel representation in the Delphi survey was largely from Europe and North America.
- The majority of participants in the face-to-face consensus meeting were from the UK.

## BACKGROUND

International guidelines for the conduct of preventive studies for both episodic and chronic migraine specify that the primary outcome should be focussed on migraine days, or for chronic migraine on moderate to severe headache days<sup>1</sup>. Reviews of clinical trials of populations with chronic migraine and episodic migraine have identified substantial inconsistencies in outcomes reporting alongside often poorly defined outcomes<sup>2,3</sup>. An important impact of these inconsistencies is to limit the potential for robust meta-analyses<sup>4,5</sup>. For example, a 2015 meta-analysis of drugs for the prophylaxis of migraine by Jackson et al<sup>6</sup> did not include data from the largest and most robust trial of topiramate for chronic migraine (n=307) that found a mean difference of 1.7 migraine/migrainous days per 28 days after 12 weeks<sup>7</sup>. The reviewers meta-analysed the data from two much smaller (n=32 & n=50), low quality studies, and reported an effect size of 8.4 headache days, the outcome specified for the meta-analyses, after 12 weeks. Data that cannot be interpreted or utilised can result in unacceptable and unethical research waste. There is also potential for selective outcomes reporting and associated reporting bias if consistent outcomes are not pre-specified<sup>8,9</sup>.

Improved consistency, accountability and transparency in outcome reporting can be achieved by using a Core Outcome Set (COS); a small, standardised group of outcomes that should be measured and reported, as a minimum, in all effectiveness trials for a specific health area<sup>10-12</sup>.

Current international guidelines for conduct of prevention studies in episodic or chronic migraine have not developed outcome reporting recommendations in line with current best practice<sup>1,13</sup>. Notably, patient input is markedly absent from these guidelines.

We describe here the development of a multiple-stakeholder, internationally endorsed, consensus-based COS applicable to preventative intervention trials and research studies in adults with episodic or chronic MIGraine (COSMIG).

## Methods

Two key stages in core outcome set development are described (figure 1)<sup>14</sup>:

*Stage 1) Defining the core domain set:* WHAT to measure; i.e., the minimum number of health domains that must be assessed. A domain describes the concept or 'aspect of health or a health condition that needs to be measured to appropriately assess the effects of a health intervention'<sup>14</sup>.

*Stage 2) Recommending the core measurement set:* HOW to measure, i.e., the minimum set of assessment methods that adequately correspond to the core domain set.

1  
2  
3 We prospectively registered COSMIG with the Core Outcomes Measures in Effectiveness Trials  
4 (COMET) initiative [<http://www.comet-initiative.org/studies/details/953?result=true>]. Ethical  
5 approval was gained from Warwick Medical School Biomedical and Scientific Research Ethics  
6 Committee REGO-2017-1921.  
7  
8  
9

#### 10 Patient and public involvement

11 Following good practice guidance [[https://www.invo.org.uk/posttypresource/before-you-start-](https://www.invo.org.uk/posttypresource/before-you-start-involving-people/)  
12 [involving-people/](https://www.invo.org.uk/posttypresource/before-you-start-involving-people/)];<sup>15</sup>, we worked collaboratively with our patient research partners throughout all  
13 stages of the research.  
14  
15  
16  
17

18 The COSMIG core group consisted of clinicians with expertise in headaches and migraine (MM,MU,  
19 BD, RL,RJ), research scientists with expertise in clinical trials, health measurement and qualitative  
20 research (MU,KH,RF,RP,SP,VN,SP,KS) and patient research partners (GP,BB,LM).. Regular meetings  
21 were held between all group members, and specifically between each Delphi round, to discuss  
22 results, confirm feedback and format for subsequent rounds.  
23  
24  
25  
26  
27  
28

#### 29 **Stage 1 Core Domain Set**

##### 30 **Stage 1.1: Developing a comprehensive domain list**

31 We first identified potential domains from systematic reviews<sup>2,3</sup> and qualitative research<sup>16</sup>.  
32 Domains were written in plain English as on-line questionnaires: one questionnaire contained  
33 domains for episodic headache, and one for chronic headache. Questionnaires were piloted with the  
34 core team and researchers naïve to the study (n=12).  
35  
36  
37  
38  
39  
40  
41

##### 42 **Stage 1.2: International modified-Delphi process**

43 Our primary goal, for our Delphi study was to refine and prioritise domains. We sought consensus  
44 between experts on the core domain set. We defined two expert panels external to the core  
45 research team: one comprised of patients with a target of 50 with chronic migraine (CM) and 50 with  
46 episodic migraine (EM); and a second panel (also with a target of 50) comprised of healthcare  
47 professionals and researchers.  
48  
49  
50  
51

52 **Patients:** We asked 13 national/international organisations to advertise the study on their  
53 social media platforms (Appendix 1). Interested participants (≥18-years old) contacted the research  
54 team. We asked participants to self-diagnose/classify their migraines as episodic or chronic migraine.  
55 Patient participants completed episodic *or* chronic migraine questionnaires depending on their self-  
56 diagnosis.  
57  
58  
59  
60

1  
2  
3 **Professionals:** We invited national and international healthcare professionals (neurologists,  
4 GPs, nurses, psychologists, pharmacists, allied health professionals) and researchers (trialists,  
5 reviewers, health economists, measurement experts) involved in headache research identified  
6 through professional societies and from published research to participate. They were asked to  
7 complete *both* questionnaires.  
8  
9

10  
11 The Delphi process had three sequential rounds with participants completing each prior round  
12 eligible to complete the next. The Delphi study administration and hosting of the on-line  
13 questionnaires was managed by Clinvivo Ltd.  
14  
15  
16

17  
18 Round 1 Participants rated the relative importance of each domain for inclusion in future research  
19 studies of chronic or episodic headache using a nine point numerical rating scale (range 1 to 3 'Not  
20 at all important', 4 to 6 'Uncertain', and 7 to 9 'Very important'). Participants could elaborate on  
21 their decisions and/or provide additional domains for consideration in subsequent rounds. Informed  
22 by an approach described by Orbai et al. (2017)<sup>17</sup>, we devised a bespoke grading system to illustrate  
23 where consensus was achieved and to indicate more easily where participants in each group  
24 disagreed in their judgement (Appendix Table 1).  
25  
26  
27  
28  
29

30  
31 An *a priori* decision rule determined that only those outcome domains judged most favourably by  
32 one or both groups (patients and professionals) would be included in round two.  
33  
34

35 Round 2 In round two we focused more specifically on migraine-specific, rather than headache-  
36 specific, domains. Responses to round one were summarised and anonymous feedback provided  
37 (own score; group median scores). Further prioritisation was achieved by inviting participants to  
38 'spend points' (up to a maximum of 70) to illustrate how strongly they felt that a domain should be  
39 prioritised for inclusion in the core domain set; a maximum of 10 points could be allocated to any  
40 one outcome domain (11-point scale, 0 'Not a priority' to 10 'Absolute priority'). To ensure that  
41 group differences were observed, the results from both groups were considered both separately and  
42 combined: the top 10 and top 50% of prioritised domains were discussed between COSMIG core  
43 team members, informing the maintenance of, or, where the concepts of health were similar,  
44 grouping of domains into a single 'meaningful' domain.  
45  
46  
47  
48  
49  
50  
51

52  
53 Round 3 Responses to round two were summarised, highlighting the top 50% of prioritised domains  
54 and between-group discrepancies. For those domains prioritised highly by just one group (top 50%),  
55 participants were asked to reconsider if they should be included in the priority listing. If more than  
56 70% of respondents selected 'yes', the domain was included. Finally, participants were asked to  
57  
58  
59  
60



1  
2  
3 indicate by means of a dichotomous response if they: a) were happy with the grouping of prioritised  
4 domains; b) were happy with the proposed 'meaningful' domain and definition; and c) had  
5 additional comments. The frequency distribution of responses was calculated.  
6  
7  
8  
9

## 10 **Stage 2: Core Measurement Set**

### 11 **International expert panel face-to-face meeting**

12  
13 The purpose of the one-day meeting was to confirm the core domain set developed in our Delphi  
14 study, agree the core measurement set, and recommend the core outcome set. Importantly,  
15 participants were to consider that whilst a domain may be considered important, if an acceptable  
16 approach to measurement is not available, it is not appropriate to include the domain in a core  
17 outcome set.  
18  
19  
20  
21  
22

23 We invited professionals from Europe and patients from the UK who had taken part in our Delphi  
24 study. Participants received an information pack with meeting objectives and domain/measurement  
25 information ahead of the meeting. Where existing consensus for potential measures was not  
26 available, the COSMIG core team reviewed key data sources for guidance and evidence of  
27 measurement quality, acceptability and feasibility for use in preventive studies of episodic or chronic  
28 migraine:  
29  
30  
31  
32

- 33 • Migraine / headache:
  - 34 ○ Review of patient-reported outcome measures (PROMS)<sup>2</sup>
  - 35 ○ International Headache Society guidelines <sup>1, 13, 18</sup>
  - 36 ○ National Institute for Neurological Disorders Common Data Elements –  
37 Headache (preventative treatment)<sup>19</sup>
  - 38
  - 39
  - 40
  - 41
- 42 • Chronic Pain and core outcome set development
  - 43 ○ Initiative on Methods, Measurement and Pain Assessment in Clinical Trials<sup>20-</sup>  
44 <sup>22</sup>
  - 45 ○ Outcome Measures in Rheumatology and Clinical Trials group <sup>23</sup>
  - 46
  - 47
  - 48

49 The meeting started with an overview of the results of the Delphi process, prioritised domains and  
50 the evidence-base underpinning potential methods of assessment. Participants considered three  
51 options when determining domain 'placement' within the final core outcome set <sup>17</sup>:  
52  
53

- 54 i) *Core 'inner' circle*: domain is unambiguous with an acceptable method of  
55 assessment;
- 56
- 57 ii) *Middle circle*: domain is important, but not feasible for all preventative trials and  
58 research studies;  
59  
60

- 1  
2  
3           iii)       *Outer circle*: domain is important, but requires further study (research agenda) – e.g.  
4                         lacks conceptual clarity or method of assessment.  
5  
6  
7

8  
9       Semi-structured, small-group discussions with a mix of patients, healthcare  
10      professionals/researchers and members of the core research team (including patient partners)  
11      ensued, covering each prioritised domain. Two facilitators each supported two rounds of discussion  
12      per domain. Outcome domains and methods of assessment were reviewed in terms of importance,  
13      quality, acceptability and feasibility. Facilitators supported participant contribution, sharing findings  
14      between groups to foster the flow of thinking. Following each small-group discussion, participants,  
15      with the exception of the core research team, were asked to indicate anonymously (paper-based  
16      questionnaire) their preference for domain inclusion (yes/no/don't know) and assessment (selecting  
17      one option from a short-list); where  $\geq 70\%$  of panellists agreeing was set as an *a priori* definition of  
18      agreement.  
19  
20  
21  
22  
23  
24  
25

26  
27       Next, small group discussions and results were presented to the whole group. Where there was  
28      agreement, no further discussion was required. Subsequent discussion focused on where further  
29      refinement was required. Finally, participants voted electronically to confirm domain placement in  
30      the COS (inner/middle/outer/out) and method of assessment. Proceedings were captured in the  
31      form of detailed written records and the outcomes of voting.  
32  
33  
34  
35  
36

## 37       **Results**

### 38       ***Stage 1 Core Domain Set***

#### 39       ***Stage 1.1: Developing a comprehensive domain list***

40       A total of 57 (episodic) and 58 (chronic) domains were included in the questionnaire, grouped across  
41       four areas: symptoms (17), life impact (27 episodic / 28 chronic), treatment effectiveness/ financial  
42       impact (10) and complications (2). Piloting informed minor language modifications. Fifty seven of  
43       the domains of interest were included for both episodic and chronic migraine.  
44  
45  
46  
47  
48  
49

#### 50       ***Stage 1.2: International modified-Delphi process***

##### 51       *Round one*

52       ***Group 1*** (patients) Two organisations advertised the study (Migraine Association, Ireland; National  
53       Migraine Centre, UK). Almost 80% (76/96) of patients who expressed an interest in taking part in the  
54       study completed the first questionnaire (42/53 CM (79%); 34/43 EM (79%)). Most were female (CM  
55       40/53 (73%); EM 29/43 (66%)) and aged between 36-45 (CM 41%) and 56-65 years (EM 32%) (range  
56  
57  
58  
59  
60

18 to >66 years). Most were from the UK (57%), followed by the US (19%), Ireland (14%), Canada (2%), and the rest of Europe (Denmark (2%), France (5%)).

**Group 2** (professionals) From a total of 198 international healthcare professionals/researchers invited to participate, 64 agreed. Nearly half (31/64 (48%)) completed the episodic migraine questionnaire and slightly more (33/64 (52%)) completed the chronic migraine questionnaires. Most were from the UK 14/33 (42%), with participants from the US 5/33 (15%), Europe (Belgium 1/33 (3%), Germany 2/33 (6%), Italy 1/33 (3%), Netherlands 1/33 (3%), Portugal 1/33 (3%), Serbia 1/33 (3%), Spain 2/33 (6%) and Turkey 1/33 (3%)), the Russian Federation 1/33 (3%), South Africa 1/33 (3%) and Thailand 1/33 (3%). Professionals included neurologists, nurse specialists, general practitioner, allied health professionals, researchers and measurement experts (Appendix Table 2).

In total, 75 (64%) and 65 (61%) panellists completed round 1 chronic and episodic migraine questionnaires, respectively.

Most domains were rated as 'important', with few between group discrepancies. Implementation of the *a priori* decision rule (Appendix Table 1) supported a 50% reduction in domains, with the prioritisation of 18/57 (episodic) and 24/58 (chronic) domains (Table 1). Qualitative feedback informed further consideration of 10 domains (9 episodic, 7 chronic) not achieving the proposed benchmark. No 'new' domains were proposed.

Table 1. Delphi Round 1 shortlisted domains by voting prioritisation and agreement between groups

| Domain                                                                                                              | EPISODIC MIGRAINE                               |                      | CHRONIC MIGRAINE      |                      |
|---------------------------------------------------------------------------------------------------------------------|-------------------------------------------------|----------------------|-----------------------|----------------------|
|                                                                                                                     | Evidence supporting inclusion in Round 2 Delphi |                      |                       |                      |
|                                                                                                                     | Voting prioritisation                           | Qualitative feedback | Voting prioritisation | Qualitative feedback |
| <b>Section 1: Life impact – symptoms associated with headache / migraine</b>                                        |                                                 |                      |                       |                      |
| <b>Cognitive function</b> – difficulty concentrating, ability to 'think clearly' or to remember things              | (A)                                             | Yes                  | A*                    |                      |
| <b>Increased sensitivities</b> – to light, sound, smell, touch                                                      | A*                                              |                      | A*                    |                      |
| <b>Pain associated with headache</b> – experience an unpleasant physical sensation that aches or hurts              | A**                                             |                      | A*                    |                      |
| <b>Duration of pain</b> associated with a headache                                                                  | A**                                             |                      | A*                    |                      |
| <b>Frequency of pain</b> associated with a headache                                                                 | A**                                             |                      | A*                    |                      |
| <b>Severity / intensity of pain</b> associated with a headache                                                      | A**                                             |                      | A*                    |                      |
| <b>Physical fatigue</b> – experiencing physical fatigue, tiredness, lacking in energy, feeling physically exhausted | (A)                                             | Yes                  | A*                    |                      |
| <b>Sleep quality</b> – being able to have a restful sleep                                                           | (A)                                             |                      | A*                    |                      |
| <b>Vomiting</b> and/or feelings of nausea                                                                           | A*                                              |                      | (A)                   |                      |
| <b>Anxiety</b> – concerned, worried, fearful or anxious                                                             | (A)                                             | Yes                  | (A)                   | Yes                  |
| <b>Depressive mood</b> – feeling sad, feeling down, feeling sorry for oneself or feeling depressed                  | (A)                                             | Yes                  | (A)                   | No                   |

|                                                                                                                                                                                                                                                                            |     |     |     |     |
|----------------------------------------------------------------------------------------------------------------------------------------------------------------------------------------------------------------------------------------------------------------------------|-----|-----|-----|-----|
| <b>Section 2: Life impact – functioning, activities and general wellbeing</b>                                                                                                                                                                                              |     |     |     |     |
| <i>Activities of daily life</i>                                                                                                                                                                                                                                            |     |     |     |     |
| Being able to carry out <b>usual tasks or daily activities</b> inside or outside the home (not related to paid employment) <b>that support an independent lifestyle</b> – such as tidying one’s home, walking short distances, managing finance, driving, using technology | (A) |     | A*  |     |
| Needing to rest or lie down <b>because of</b> a headache                                                                                                                                                                                                                   | (A) |     | A*  |     |
| <i>Emotional wellbeing</i>                                                                                                                                                                                                                                                 |     |     |     |     |
| <b>Feelings of isolation</b> – feeling isolated, reduced social interactions                                                                                                                                                                                               | (B) | Yes | (A) | Yes |
| <b>Self-worth</b> – feeling like a burden to others; can include feeling valued or helpless, accepted or rejected; feelings of self-esteem                                                                                                                                 | (B) | Yes | (A) | Yes |
| <b>Stress</b> – feelings of distress, frustration or irritation                                                                                                                                                                                                            | A*  |     | (A) | Yes |
| <i>Work/Education</i>                                                                                                                                                                                                                                                      |     |     |     |     |
| Being able to carry out <b>activities related to work</b> (paid or unpaid) / <b>study</b> to an acceptable or usual standard                                                                                                                                               | A*  |     | A** |     |
| Needing to take <b>time-off work</b> (paid or unpaid) / <b>study</b>                                                                                                                                                                                                       | A*  |     | A*  |     |
| <i>Social life</i>                                                                                                                                                                                                                                                         |     |     |     |     |
| <b>Social life</b> – relationships with colleagues or peers                                                                                                                                                                                                                |     |     | A*  |     |
| <b>Family roles</b> – being able to <b>provide</b> usual care and support for family and close friends                                                                                                                                                                     | (A) | Yes | (A) | Yes |
| <b>Participation in social or leisure activities</b> – ability to participate in social or leisure activities                                                                                                                                                              | (A) | Yes | (A) | Yes |
| <b>Overall health</b> – an individual’s general health status; the ability to live a ‘normal ‘ life                                                                                                                                                                        | A*  |     | A*  |     |
| <b>Self-management</b> – ability to effectively decrease/ minimise / control the impact of migraine on oneself (e.g. pharmacology, diet, lifestyle choices)                                                                                                                | A*  |     | A*  |     |
| <b>Unpredictability of a migraine</b> – uncertainty of being symptom-free or able to engage in activities                                                                                                                                                                  | A*  | No  | (A) | Yes |
| <b>Trigger factors</b> – ability to avoid / manage migraine trigger factors                                                                                                                                                                                                | (B) | Yes |     | No  |
| <b>Section 3: Treatment effectiveness and financial impact</b>                                                                                                                                                                                                             |     |     |     |     |
| <b>Satisfaction</b> with treatment                                                                                                                                                                                                                                         | A*  |     | A*  |     |
| <b>Confidence</b> in treatment                                                                                                                                                                                                                                             | A*  |     | A*  |     |
| <b>Consistency</b> of treatment effect                                                                                                                                                                                                                                     | A*  |     | A*  |     |
| Medication use – the type (potency) and dose (how much) medication <b>taken when experiencing</b> a migraine or headache                                                                                                                                                   | A*  |     | A*  |     |
| Medication use – the type (potency) and dose (how much) medication <b>taken to prevent</b> a migraine or headache                                                                                                                                                          | A*  |     | A*  |     |
| <b>Financial impact</b> – the economic cost associated with migraine treatment (to the individual (out of pocket expenses)) and healthcare systems)                                                                                                                        | (A) |     | A*  |     |
| <b>Use of healthcare resources</b> in response to migraine                                                                                                                                                                                                                 | (A) |     | A*  |     |
| <b>Section 4: Complications (Adverse Events)</b>                                                                                                                                                                                                                           |     |     |     |     |
| <b>Treatment side effects</b> – experiencing undesirable secondary effects from taking medications for migraine                                                                                                                                                            | A*  |     | A** |     |

|                                                          |           |  |           |  |
|----------------------------------------------------------|-----------|--|-----------|--|
| <i>Mortality</i> (death)                                 | (A)       |  | A**       |  |
| Included in Round 2 due to importance scores (A** or A*) | 18        |  | 24        |  |
| Included in Round 2 due to qualitative feedback          | 9         |  | 7         |  |
| New outcomes added due to qualitative feedback           | 0         |  | 0         |  |
| <b>TOTAL number of outcomes for inclusion in Round 2</b> | <b>27</b> |  | <b>31</b> |  |

Footnote: Each outcome was assigned to one of six categories reflecting levels of agreement: outcomes classified A\*\* and A\* would be included in round 2.

- A\*\* if in both sub-panel groups the median rating is 9
- A\* if in both sub-panel groups  $\geq 70\%$  rate an outcome  $\geq 7$
- (A) if in both sub-panel groups the median outcome rating is  $\geq 7$
- (B) if the median rating for an outcome is  $\geq 7$  in only one sub-panel group

### Round two

Round two questionnaires contained 27 (episodic) and 31 (chronic) domains. Round two was completed by 23/33 (70%) and 29/31 (93%) health professionals and 33/42 (79%) and 25/34 (74%) patients for chronic and episodic migraine, respectively (totalling 54 episodic (83%) and 56 chronic (75%) migraine questionnaires completed).

When prioritised according to the top 10 and top 50% of domains, several overriding 'meaningful' domains could be described (Tables 2 a-b); six of which were common to both episodic and chronic migraine: pain, usual activities, cognition, adverse events, overall health, associated symptoms. Respondents to the episodic migraine questionnaire also prioritised self-management, whilst medication use was prioritised by chronic migraine respondents.

Table 2a. Delphi Round 2. Results of domain prioritisation for Episodic Migraine (combined panels n=27)\*\*

| Rank* | Proposed 'merged' domain and definition                                                                                                                                                                     | Top 10/27 prioritised domains                                                                                                        | Top 50% of prioritised domains (rank 1 to 13/27 inclusive) | Lower 50% of prioritised domains (rank 14 to 27 inclusive) |
|-------|-------------------------------------------------------------------------------------------------------------------------------------------------------------------------------------------------------------|--------------------------------------------------------------------------------------------------------------------------------------|------------------------------------------------------------|------------------------------------------------------------|
| 1     | <b>Pain</b><br>- <i>Experience of an unpleasant sensation that aches or hurts in the head; the frequency, severity and duration of this pain is important</i>                                               | Pain associated with Migraine – experience of an unpleasant sensation that aches or hurts (1/27)                                     |                                                            |                                                            |
|       |                                                                                                                                                                                                             | Frequency of pain associated with a migraine (2/27)                                                                                  |                                                            |                                                            |
|       |                                                                                                                                                                                                             | Severity or intensity of pain associated with a migraine (3/27)                                                                      |                                                            |                                                            |
|       |                                                                                                                                                                                                             | Duration of pain associated with a migraine (4/27)                                                                                   |                                                            |                                                            |
| 2     | <b>Usual activities</b><br>- <i>Being able to carry out usual activities (including paid or unpaid work, study, domestic chores, care or support for family or close friends) to an acceptable or usual</i> | Being able to carry out <b>activities related to work</b> (paid or unpaid) <b>or study</b> to an acceptable or usual standard (5/27) |                                                            |                                                            |
|       |                                                                                                                                                                                                             | Family roles – able to provide usual care or support for family or close friends, including ability to commit activities (11/27)     |                                                            |                                                            |

|   |                                                                                                          |                                                                                                               |                                                                                                                                                                    |                                                                                                                                                                              |
|---|----------------------------------------------------------------------------------------------------------|---------------------------------------------------------------------------------------------------------------|--------------------------------------------------------------------------------------------------------------------------------------------------------------------|------------------------------------------------------------------------------------------------------------------------------------------------------------------------------|
|   | <i>standard</i>                                                                                          |                                                                                                               | Needing to take time-off work (paid or unpaid) or study (13/27)                                                                                                    |                                                                                                                                                                              |
|   | - <b>Being able to participate in, or commit to, usual activities</b>                                    |                                                                                                               |                                                                                                                                                                    | Participation in social or leisure activities – ability to participate in, or commit to, social or leisure activities (22/27)                                                |
| 3 | <b>Cognition</b><br>- <b>Difficulty concentrating, ability to 'think clearly', or to remember things</b> | Cognitive function – difficulty concentrating, ability to think 'clearly' or to remember things (6/27)        |                                                                                                                                                                    |                                                                                                                                                                              |
| 4 | <b>Adverse events</b>                                                                                    | Treatment side-effects – experiencing undesired secondary effects from taking medications for migraine (7/27) |                                                                                                                                                                    |                                                                                                                                                                              |
| 5 | <b>Overall health</b>                                                                                    | An individual's general health status; the ability to 'live a normal life' (8/27)                             |                                                                                                                                                                    |                                                                                                                                                                              |
| 6 | <b>Self-management</b>                                                                                   | Trigger factors – the ability to avoid / manage migraine trigger factors (9/27)                               |                                                                                                                                                                    |                                                                                                                                                                              |
|   |                                                                                                          |                                                                                                               | Self-management – ability to effectively decrease / minimise/ control the impact of migraine on oneself (e.g. pharmaceutical, diet, lifestyle choices etc) (11/27) |                                                                                                                                                                              |
|   |                                                                                                          |                                                                                                               |                                                                                                                                                                    | Unpredictability of a migraine – uncertainty of being symptom free or able to engage in activities (17/27)<br><b>** prioritised in top 10 (10/27) by patients</b>            |
| 7 | <b>Associated symptoms</b>                                                                               | Increased sensitivities – to light, sound, smell or touch (10/27)                                             |                                                                                                                                                                    |                                                                                                                                                                              |
|   |                                                                                                          |                                                                                                               |                                                                                                                                                                    | Vomiting and/ or feelings of nausea (15/27)<br><b>** prioritised in top 10 (8/27) by HCPs</b>                                                                                |
|   |                                                                                                          |                                                                                                               |                                                                                                                                                                    | Physical fatigue – experiencing physical fatigue, tiredness, lacking in energy, feeling physically exhausted (18/27)<br><b>** prioritised in top 50% (11/27) by patients</b> |
| 8 | Medication use                                                                                           |                                                                                                               |                                                                                                                                                                    | Satisfaction with treatment (14/27)<br><b>** prioritised in top 10 (9/27) by HCPs</b>                                                                                        |
|   |                                                                                                          |                                                                                                               |                                                                                                                                                                    | The type (potency) and dose (how much) of a medication <b>taken when experiencing</b> a migraine (16/27)                                                                     |

|   |                      |  |  |                                                                                                   |
|---|----------------------|--|--|---------------------------------------------------------------------------------------------------|
|   |                      |  |  | <b>** prioritised in top 50% (11/27) by HCPs</b>                                                  |
|   |                      |  |  | The type (potency) and dose (how much) of a medication <b>taken to prevent a migraine (21/27)</b> |
|   |                      |  |  | Consistency in treatment (23/27)                                                                  |
|   |                      |  |  | Confidence in treatment (25/27)                                                                   |
| 9 | Emotional well-being |  |  | Anxiety (19/27)                                                                                   |
|   |                      |  |  | Depression (19/27)<br><b>** prioritised in top 50% (13/27) by patients</b>                        |
|   |                      |  |  | Stress (24/27)                                                                                    |
|   |                      |  |  | Self-worth (24/27)                                                                                |
|   |                      |  |  | Isolation (27/27)                                                                                 |

Footnote:

\*Top 7 grouped domains – informed by top 10 and top 50% of prioritised domains (13/27).

\*\* 6 domains prioritised differently between the two panels; considered further in Round 3.

Table 2b. Delphi Round 2. Results of domain prioritisation for Chronic Migraine (combined panels n=31) \*\*.

| Rank* | Domain and definition                                                                                                                                                                                                                                                                         | Top 10/31 prioritised domains                                                                                                                                                                                                                                                                               | Top 50% of prioritised domains (rank 1 to 15/31 inclusive)      | Lower 50% of prioritised domains (rank 16 to 31 inclusive)                                                                       |
|-------|-----------------------------------------------------------------------------------------------------------------------------------------------------------------------------------------------------------------------------------------------------------------------------------------------|-------------------------------------------------------------------------------------------------------------------------------------------------------------------------------------------------------------------------------------------------------------------------------------------------------------|-----------------------------------------------------------------|----------------------------------------------------------------------------------------------------------------------------------|
| 1     | <b>Pain</b><br>- <i>Experience of an unpleasant sensation that aches or hurts in the head; the frequency, severity and duration of this pain is important</i>                                                                                                                                 | Severity or intensity of pain associated with a migraine (1/31)                                                                                                                                                                                                                                             |                                                                 |                                                                                                                                  |
|       |                                                                                                                                                                                                                                                                                               | Pain associated with Migraine – experience of an unpleasant sensation that aches or hurts (2/31)                                                                                                                                                                                                            |                                                                 |                                                                                                                                  |
|       |                                                                                                                                                                                                                                                                                               | Frequency of pain associated with a migraine (3/31)                                                                                                                                                                                                                                                         |                                                                 |                                                                                                                                  |
|       |                                                                                                                                                                                                                                                                                               | Duration of pain associated with a migraine (4/31)                                                                                                                                                                                                                                                          |                                                                 |                                                                                                                                  |
| 2     | <b>Usual activities</b><br>- <i>Being able to carry out usual activities (including paid or unpaid work, study, domestic chores, care or support for family or close friends) to an acceptable or usual standard</i><br>- <i>Being able to participate in, or commit to, usual activities</i> | Being able to carry out usual tasks or daily activities inside or outside the home (not related to paid employment) that support an independent lifestyle – such as tidying one's home, walking short distances, managing finance, driving, usual technology (instrumental activities of daily life) (5/31) |                                                                 |                                                                                                                                  |
|       |                                                                                                                                                                                                                                                                                               | Being able to carry out activities related to work (paid or unpaid) or study to an acceptable or usual standard (6/31)                                                                                                                                                                                      |                                                                 |                                                                                                                                  |
|       |                                                                                                                                                                                                                                                                                               |                                                                                                                                                                                                                                                                                                             | Needing to take time-off work (paid or unpaid) or study (11/31) |                                                                                                                                  |
|       |                                                                                                                                                                                                                                                                                               |                                                                                                                                                                                                                                                                                                             |                                                                 | Family roles – able to provide usual care or support for family or close friends, including ability to commit activities (19/31) |



|   |                                                                                                          |                                                                                                                      |                                                                                    |                                                                                                                                             |
|---|----------------------------------------------------------------------------------------------------------|----------------------------------------------------------------------------------------------------------------------|------------------------------------------------------------------------------------|---------------------------------------------------------------------------------------------------------------------------------------------|
|   |                                                                                                          |                                                                                                                      |                                                                                    | Participation in social or leisure activities – ability to participate in, or commit to, social or leisure activities (22/31)               |
| 3 | <b>Cognition</b><br>- <i>Difficulty concentrating, ability to 'think clearly', or to remember things</i> | Cognitive function – difficulty concentrating, ability to think 'clearly' or to remember things (7/27)               |                                                                                    |                                                                                                                                             |
| 4 | <b>Adverse events</b>                                                                                    | Treatment side-effects – experiencing undesired secondary effects from taking medications for migraine (8/31)        |                                                                                    |                                                                                                                                             |
|   |                                                                                                          |                                                                                                                      |                                                                                    | Mortality (death) (26/31)<br><b>** prioritised in top 50% (15/31) by HCPs</b>                                                               |
| 5 | <b>Associated symptoms</b>                                                                               | Increased sensitivities – to light, sound, smell or touch (9/31)                                                     |                                                                                    |                                                                                                                                             |
|   |                                                                                                          | Physical fatigue – experiencing physical fatigue, tiredness, lacking in energy, feeling physically exhausted (10/31) |                                                                                    |                                                                                                                                             |
|   |                                                                                                          |                                                                                                                      | Sleep quality – being able to have a restful sleep (14/31)                         |                                                                                                                                             |
|   |                                                                                                          |                                                                                                                      | Needing to rest or lie down because of a headache (15/31)                          |                                                                                                                                             |
| 6 | <b>Medication use</b>                                                                                    |                                                                                                                      | Satisfaction with treatment (12/31)                                                |                                                                                                                                             |
|   |                                                                                                          |                                                                                                                      |                                                                                    | The type (potency) and dose (how much) of a medication taken to prevent a migraine (21/31)                                                  |
|   |                                                                                                          |                                                                                                                      |                                                                                    | Consistency in treatment effect (23/31)                                                                                                     |
|   |                                                                                                          |                                                                                                                      |                                                                                    | The type (potency) and dose (how much) of a medication taken during a migraine (24/31)                                                      |
|   |                                                                                                          |                                                                                                                      |                                                                                    | Confidence in treatment (28/31)                                                                                                             |
| 7 | <b>Overall health</b>                                                                                    |                                                                                                                      | An individual's general health status; the ability to 'live a normal life' (13/31) |                                                                                                                                             |
| 8 | Emotional well-being                                                                                     |                                                                                                                      |                                                                                    | Stress – feelings of distress, frustration or irritation (16/31)<br><b>** prioritised in top 10 (10/31) by HCPs</b>                         |
|   |                                                                                                          |                                                                                                                      |                                                                                    | Anxiety – concerned, worried, fearful or anxious (20/31)                                                                                    |
|   |                                                                                                          |                                                                                                                      |                                                                                    | Self-worth – feeling like a burden to others; can include feeling valued or helpless; accepted or rejected; feelings of self-esteem (28/31) |



|    |                  |  |  |                                                                                                                                                                    |
|----|------------------|--|--|--------------------------------------------------------------------------------------------------------------------------------------------------------------------|
|    |                  |  |  | Feelings of isolation – feeling isolated; reduced social interactions (29/31)                                                                                      |
|    |                  |  |  | Social role – relationship with work colleagues or peers (31/31)                                                                                                   |
| 9  | Self-management  |  |  | Self-management – ability to effectively decrease / minimise/ control the impact of migraine on oneself (e.g. pharmaceutical, diet, lifestyle choices etc) (17/31) |
|    |                  |  |  | Unpredictability of a migraine – uncertainty of being symptom free or able to engage in activities (18/31)<br><b>** prioritised in top 50% (14/31) by patients</b> |
| 10 | Financial impact |  |  | Economic cost associated with treatment for headache (to the individual (out-of-pocket expenses) and healthcare system) (25/31)                                    |
|    |                  |  |  | Use of healthcare resources in response to headache (30/31)                                                                                                        |

Footnote:

\* Top 5 grouped domains – informed by top 10 prioritised domains. Top 7 grouped domains – informed by top 13 and top 50% of prioritised domains (15/31).

\*\* 3 domains prioritised differently between the two panels; considered further in Round 3.

Group discrepancies for both episodic and chronic migraine included patients' prioritisation of overall health, physical fatigue, unpredictability and self-management. People with episodic migraine also prioritised emotional wellbeing. Although awarded fewer points, people with chronic migraine prioritised the importance of social role and emotional wellbeing. In contrast, healthcare professionals prioritised treatment satisfaction, treatment side-effects and vomiting/ nausea for episodic migraine, and mortality and stress for chronic migraine.

### Round three

Round three was completed by 23/23 (100%) and 21/29 (72%) health professionals, and 29/33 (88%) and 23/25 (92%) patients for chronic and episodic migraine, respectively (totalling 52/56 (93%) for chronic migraine and 44/54 EM (81%) for episodic migraine. Six and three domain discrepancies (top 10 or top 50% for one group only) were considered for episodic migraine (treatment satisfaction; vomiting/ feelings of nausea; medication taken during a migraine; unpredictability; physical fatigue; depressive mood) and chronic migraine (stress; mortality; unpredictability), respectively (Appendix Table 3).

The seven domains for episodic migraine were retained (>76% across sub-panels; >84% combined) (Table 3) and a new domain ‘Treatment Satisfaction’ proposed (>70% healthcare professionals; 68% combined) (Appendix Table 3).

Table 3. Delphi Round 3: results of voting for domains for episodic and chronic migraine

| Proposed CORE DOMAINS for EM and CM<br><i>(For voting in Round 3)</i>                                                                                                                                                                                                                                |                                                                                                                                                                                                                                                                                                                                                                                                                                                                              |    | EPISODIC MIGRAINE<br><i>Voting</i> |                |                    | CHRONIC MIGRAINE<br><i>Voting</i> |                |                    |
|------------------------------------------------------------------------------------------------------------------------------------------------------------------------------------------------------------------------------------------------------------------------------------------------------|------------------------------------------------------------------------------------------------------------------------------------------------------------------------------------------------------------------------------------------------------------------------------------------------------------------------------------------------------------------------------------------------------------------------------------------------------------------------------|----|------------------------------------|----------------|--------------------|-----------------------------------|----------------|--------------------|
| Prioritised domains<br><i>(informed by Round 2)</i>                                                                                                                                                                                                                                                  | Proposed ‘Meaningful Domain’ and definition<br><i>(bold text informed by R3 qualitative feedback)</i>                                                                                                                                                                                                                                                                                                                                                                        | Q  | Patient<br>(n=23)                  | HCPs<br>(n=21) | Combined<br>(n=44) | Patient<br>(n=29)                 | HCPs<br>(n=23) | Combined<br>(n=52) |
| <ul style="list-style-type: none"> <li>Pain associated with migraine – an unpleasant sensation that aches or hurts</li> <li>Frequency of pain associated with migraine</li> <li>Severity or intensity of pain associated with migraine</li> <li>Duration of pain associated with migraine</li> </ul> | <p><b>PAIN</b></p> <ul style="list-style-type: none"> <li>Experience of an unpleasant sensation in the head that aches or hurts and is associated with experiencing a migraine;</li> <li>the components of frequency, severity and duration of pain are all important</li> </ul> <p><i>Qualitative feedback supported the addition of:</i></p> <ul style="list-style-type: none"> <li>unpleasant sensation in the head ... <b>face, neck and/or shoulders ...</b></li> </ul> | a. | 100.0%                             | 100.0%         | 100.0%             | 96.6%                             | 86.9%          | 92.3%              |
|                                                                                                                                                                                                                                                                                                      |                                                                                                                                                                                                                                                                                                                                                                                                                                                                              | b. | 82.6%                              | 100.0%         | 90.9%              | 89.7%                             | 95.7%          | 92.3%              |
| <ul style="list-style-type: none"> <li>An individual’s health status; the ability to live a ‘normal’ life</li> </ul>                                                                                                                                                                                 | <p><b>OVERALL HEALTH</b></p> <ul style="list-style-type: none"> <li>An individual’s health status; the ability to live a ‘normal’ life</li> </ul> <p><i>Qualitative feedback challenged the concept or ‘normal life’ and the lack of clarity re a focus on <b>migraine-specific or general quality of life.</b> To be explored during the consensus meeting.</i></p>                                                                                                         | a. | 100.0%                             | 90.5%          | 95.5%              | 96.6%                             | 87.0%          | 92.3%              |
|                                                                                                                                                                                                                                                                                                      |                                                                                                                                                                                                                                                                                                                                                                                                                                                                              | b. | 87.0%                              | 81.0%          | 84.1%              | 89.7%                             | 78.3%          | 84.6%              |
| <ul style="list-style-type: none"> <li>Being able to carry out activities related to work (paid or unpaid) or study to an acceptable or usual standard</li> <li>Family roles-able to provide usual care or support for family or close friends,</li> </ul>                                           | <p><b>USUAL ACTIVITIES</b></p> <ul style="list-style-type: none"> <li>Being able to carry out usual activities (including paid or unpaid work, study, domestic chores, family or leisure activities, care or support for family or close friends) to an acceptable or usual standard</li> </ul>                                                                                                                                                                              | a. | 95.7%                              | 81.0%          | 88.6%              | 100.0%                            | 95.7%          | 98.1%              |
|                                                                                                                                                                                                                                                                                                      |                                                                                                                                                                                                                                                                                                                                                                                                                                                                              | b. | 95.7%                              | 76.2%          | 86.4%              | 89.7%                             | 95.7%          | 92.3%              |

|                                                                                                                                                                                                                                                                                                                                                                                                                                                        |                                                                                                                                                                                                                                                                                                                                                                                                                                                                                                                                      |                     |                            |                            |                            |                           |                           |                           |
|--------------------------------------------------------------------------------------------------------------------------------------------------------------------------------------------------------------------------------------------------------------------------------------------------------------------------------------------------------------------------------------------------------------------------------------------------------|--------------------------------------------------------------------------------------------------------------------------------------------------------------------------------------------------------------------------------------------------------------------------------------------------------------------------------------------------------------------------------------------------------------------------------------------------------------------------------------------------------------------------------------|---------------------|----------------------------|----------------------------|----------------------------|---------------------------|---------------------------|---------------------------|
| <p>including to commit to activities (<i>EM only</i>)</p> <ul style="list-style-type: none"> <li>• Need to take time-off work (paid or unpaid) or study</li> <li>• Being able to carry out usual tasks or daily activities inside or outside the home (not related to employment) that support an independent lifestyle – such as tidying one's home, walking short distances, managing finance, driving, using technology (<i>CM only</i>)</li> </ul> | <ul style="list-style-type: none"> <li>- Being able to participate in or commit to usual activities</li> </ul> <p><i>Qualitative feedback supported the importance of including 'unpredictability' in the definition:</i></p> <ul style="list-style-type: none"> <li>- <b>Being able to plan, commit to, or participate in usual activities, including work, usual social or caring roles (due to the unpredictability of a migraine)</b></li> </ul>                                                                                 |                     |                            |                            |                            |                           |                           |                           |
| <ul style="list-style-type: none"> <li>• Cognitive function – difficulty concentrating, ability to think 'clearly' or to remember things</li> </ul>                                                                                                                                                                                                                                                                                                    | <p><b>COGNITIVE FUNCTION</b></p> <ul style="list-style-type: none"> <li>- Difficulty with concentrating, thinking clearly, or remembering things;</li> </ul> <p><i>Qualitative feedback supported the addition of:</i></p> <ul style="list-style-type: none"> <li>- <b>difficulty with communication (word finding, slow or slurred speech)</b></li> </ul>                                                                                                                                                                           | <p>a.</p> <p>b.</p> | <p>95.7%</p> <p>91.3%</p>  | <p>100.0%</p> <p>90.5%</p> | <p>97.7%</p> <p>90.9%</p>  | <p>96.6%</p> <p>93.1%</p> | <p>95.7%</p> <p>95.7%</p> | <p>96.1%</p> <p>94.2%</p> |
| <ul style="list-style-type: none"> <li>• Treatment side-effects – experiencing undesired secondary effects from taking medications for migraine</li> </ul>                                                                                                                                                                                                                                                                                             | <p><b>ADVERSE EFFECTS</b></p> <ul style="list-style-type: none"> <li>- Experiencing undesired secondary effects from taking medications for migraine</li> </ul> <p><i>Qualitative feedback supported adoption of the CTCAE standardised definition of adverse events:</i></p> <ul style="list-style-type: none"> <li>- <b>'any unfavourable and unintended sign, symptom, or disease temporarily associated with the use of a medical treatment or procedure that may or may not be considered related to the medical</b></li> </ul> | <p>a.</p> <p>b.</p> | <p>100.0%</p> <p>87.0%</p> | <p>100.0%</p> <p>90.5%</p> | <p>100.0%</p> <p>88.6%</p> | <p>89.7%</p> <p>93.1%</p> | <p>95.7%</p> <p>82.6%</p> | <p>92.3%</p> <p>88.5%</p> |

|                                                                                                                                                                                                                                                                                                                                                                                        | <i>treatment or procedure.’ (CTCAE ref)</i>                                                                                                                                                                                                                                                                                                                                                                                                                                                                                                                                                                                                                                                                                                                                                                                    |    |       |         |       |       |              |              |
|----------------------------------------------------------------------------------------------------------------------------------------------------------------------------------------------------------------------------------------------------------------------------------------------------------------------------------------------------------------------------------------|--------------------------------------------------------------------------------------------------------------------------------------------------------------------------------------------------------------------------------------------------------------------------------------------------------------------------------------------------------------------------------------------------------------------------------------------------------------------------------------------------------------------------------------------------------------------------------------------------------------------------------------------------------------------------------------------------------------------------------------------------------------------------------------------------------------------------------|----|-------|---------|-------|-------|--------------|--------------|
| <ul style="list-style-type: none"> <li>Increased sensitivities – to light, sound, smell or touch</li> <li>Physical fatigue – experiencing physical fatigue, tiredness, lacking in energy, feeling physically exhausted (CM only)</li> <li>Sleep quality – being able to have a restful sleep (CM only)</li> <li>Needing to rest or lie down because of a headache (CM only)</li> </ul> | <p><b>ASSOCIATED SYMPTOMS</b></p> <ul style="list-style-type: none"> <li>Increased sensitivities – to light (<b>photophobia</b>), sound (<b>phonophobia</b>), smell, touch, or movement</li> <li>Physical fatigue – experiencing physical fatigue, tiredness, lacking in energy, feeling physically exhausted (CM only)</li> <li>Sleep quality – being able to have a restful sleep (CM only)</li> <li>Needing to rest or lie down because of a headache (CM only)</li> </ul> <p><i>Qualitative feedback highlighted concern over the omission of the following components from associated symptoms:</i></p> <ul style="list-style-type: none"> <li>Visual disturbances.</li> <li>Depressive mood</li> <li>Vomiting / feelings of nausea</li> </ul> <p><i>All to be explored in consensus meeting (for both EM and CM)</i></p> | a. | 87.0% | 100.00% | 93.2% | 96.6% | 73.9%        | 86.5%        |
|                                                                                                                                                                                                                                                                                                                                                                                        |                                                                                                                                                                                                                                                                                                                                                                                                                                                                                                                                                                                                                                                                                                                                                                                                                                | b. | 87.0% | 90.5%   | 88.6% | 93.1% | 73.9%        | 84.6%        |
| <ul style="list-style-type: none"> <li>Satisfaction with treatment</li> </ul>                                                                                                                                                                                                                                                                                                          | <p><b>MEDICATION USE</b></p> <p><b>Voting: Proposed domain REJECTED (values &lt; 70%)</b></p> <p>Qualitative feedback highlighted the importance of a domain that was not just focused on medication use.</p> <p><i>NOTE: Voting on subgroup discrepancies (Table R3b) supported the inclusion of ‘Treatment Satisfaction’ as a domain within the EM domain set. Core group recommendation that ‘TREATMENT SATISFACTION’ is explored in consensus</i></p>                                                                                                                                                                                                                                                                                                                                                                      | a. | N/A   | N/A     | N/A   | 79.3% | <b>69.6%</b> | 75.0%        |
|                                                                                                                                                                                                                                                                                                                                                                                        |                                                                                                                                                                                                                                                                                                                                                                                                                                                                                                                                                                                                                                                                                                                                                                                                                                | b. |       |         |       | 72.4% | <b>60.9%</b> | <b>67.3%</b> |

|                                                                                                                                                                                                                                                                                                             | <i>meeting for both EM and CM</i>                                                                                                                                                                                                                                                                                                                                                                                                                                                                                                                                                    |    |       |       |       |     |     |     |
|-------------------------------------------------------------------------------------------------------------------------------------------------------------------------------------------------------------------------------------------------------------------------------------------------------------|--------------------------------------------------------------------------------------------------------------------------------------------------------------------------------------------------------------------------------------------------------------------------------------------------------------------------------------------------------------------------------------------------------------------------------------------------------------------------------------------------------------------------------------------------------------------------------------|----|-------|-------|-------|-----|-----|-----|
| <ul style="list-style-type: none"> <li>• Trigger factors – the ability to avoid / manage migraine trigger factors</li> <li>• Self-management – the ability to effectively decrease / minimise / control the impact of migraine on oneself (e.g. by pharmaceutical, diet, lifestyle choices etc.)</li> </ul> | <b>SELF-MANAGEMENT</b><br>- Ability to effectively decrease / minimise / control the impact of migraine on oneself (e.g. by pharmaceutical, diet, lifestyle choices etc.)<br>- Ability to avoid / manage migraine trigger factors<br><br><i>Qualitative feedback – proposed a more positive definition:</i><br>- <b>Living better with migraine through lifestyle, dietary, pharmaceutical choices and taking an active part in long-term management of migraine with education and support.</b><br>- <b>Enabling patients to become active partners in their migraine treatment</b> | a. | 95.7% | 85.7% | 90.9% | N/A | N/A | N/A |
|                                                                                                                                                                                                                                                                                                             |                                                                                                                                                                                                                                                                                                                                                                                                                                                                                                                                                                                      | b. | 91.3% | 81.0% | 86.4% |     |     |     |

Footnote:

Participants were invited to vote (Yes/No): a. Are you happy with the grouping of prioritised domains (Yes/No)? ; b. Are you happy with the proposed 'meaningful' domain and definition (Yes/No)?

N/A: Not applicable. Panellists did not vote in this domain.

Voting on sub-group discrepancies further supported the inclusion of vomiting/feelings of nausea, physical fatigue and depressive mood within the developing core domain set for episodic migraine (Appendix Table 3). Qualitative feedback in the questionnaire supported a more positive re-phrasing of the concept of self-management.

Six of the seven domains for chronic migraine were retained (>73% across sub-panels; >80% combined) (Table 4).

Table 4. Delphi Round 3: results of voting on sub-panel discrepancies.

| Outcome to be voted on (R3)                                                                                                |                                                                                                                                                                       | Q  | EPISODIC MIGRAINE<br><i>Voting</i> |                |                    | CHRONIC MIGRAINE<br><i>Voting</i> |                |                    |
|----------------------------------------------------------------------------------------------------------------------------|-----------------------------------------------------------------------------------------------------------------------------------------------------------------------|----|------------------------------------|----------------|--------------------|-----------------------------------|----------------|--------------------|
| Discrepancies<br>(outcomes rated in top 50% by one sub-panel)                                                              | Proposed Domain and definition                                                                                                                                        |    | Patient<br>(n=23)                  | HCPs<br>(n=21) | Combined<br>(n=44) | Patient<br>(n=29)                 | HCPs<br>(n=23) | Combined<br>(n=52) |
| <i>Ranked highly by healthcare professionals (HCPs)</i>                                                                    |                                                                                                                                                                       |    |                                    |                |                    |                                   |                |                    |
| <ul style="list-style-type: none"> <li>HCP 9/27; Patients 20/27 (EM)</li> </ul>                                            | <ul style="list-style-type: none"> <li><b>Satisfaction with Treatment</b></li> </ul>                                                                                  | a. | 65.2%                              | <b>71.4%</b>   | 68.2%              | -                                 | -              | -                  |
| <ul style="list-style-type: none"> <li>HCP 8/27; Patients 25/27 (EM)</li> </ul>                                            | <ul style="list-style-type: none"> <li><b>Vomiting and/ feelings of nausea</b></li> </ul>                                                                             | a. | 60.9%                              | <b>71.4%</b>   | 65.9%              | -                                 | -              | -                  |
| <ul style="list-style-type: none"> <li>HCP 12/27; Patients 18/27 (EM)</li> </ul>                                           | <ul style="list-style-type: none"> <li>Type (potency) and dose (how much) of a medication when experiencing a migraine</li> </ul>                                     | a. |                                    |                |                    | -                                 | -              | -                  |
| <ul style="list-style-type: none"> <li>HCP 10/31; Patients 20/31 (CM)</li> </ul>                                           | <ul style="list-style-type: none"> <li>Stress – feelings of distress, frustration or irritation</li> </ul>                                                            | a. | -                                  | -              | -                  | 58.6%                             | 47.8%          | 53.9%              |
| <ul style="list-style-type: none"> <li>HCP 15/31; Patients 29/31 (CM)</li> </ul>                                           | <ul style="list-style-type: none"> <li>Mortality (death)</li> </ul>                                                                                                   | a. | -                                  | -              | -                  | 20.7%                             | 17.4%          | 19.2%              |
| <i>Ranked highly by patients</i>                                                                                           |                                                                                                                                                                       |    |                                    |                |                    |                                   |                |                    |
| <ul style="list-style-type: none"> <li>Patients 10/27; HCPs 21/27 (EM)</li> <li>Patients 14/31; HCPs 31/31 (CM)</li> </ul> | <ul style="list-style-type: none"> <li><b>Unpredictability of a migraine – uncertainty of being symptom-free or able to engage in activities</b></li> </ul>           | a. | <b>82.6%</b>                       | 61.9%          | <b>72.7%</b>       | <b>96.6%</b>                      | <b>69.6%</b>   | <b>84.6%</b>       |
| <ul style="list-style-type: none"> <li>Patients 11/27; HCPs 23/27 (EM)</li> </ul>                                          | <ul style="list-style-type: none"> <li><b>Physical fatigue – experiencing physical fatigue, tiredness, lacking in energy, feeling physically exhausted</b></li> </ul> | a. | <b>69.6%</b>                       | 52.4%          | 61.4%              | -                                 | -              | -                  |
| <ul style="list-style-type: none"> <li>Patients 10/27; HCPs 21/27 (EM)</li> </ul>                                          | <ul style="list-style-type: none"> <li><b>Depressive mood – feeling sad, feeling down, feeling sorry for oneself, or feeling depressed</b></li> </ul>                 | a. | <b>69.6%</b>                       | 42.9%          | 56.8%              | -                                 | -              | -                  |

Footnote: Panellists were asked to indicate (Yes/No): a. Should the following outcomes be included in a core set for studies of EM / CM (respectively)?

‘Medication Use’ was rejected (<70%), and a redefining as ‘Treatment Satisfaction’ proposed. Qualitative feedback also highlighted the omission of ‘visual disturbances’ from ‘Associated Symptoms’, and the movement of ‘Sleep Quality’ to ‘Usual Activities’.

1  
2  
3 For both episodic and chronic migraine, qualitative feedback highlighted the importance of  
4 communication difficulties within cognitive function; further consideration of vomiting/nausea,  
5 fatigue and depressive mood as additional 'Associated Symptoms'; and unpredictability and ability to  
6 uphold usual commitments within 'Usual Activities'. Further clarification of the concept of 'Overall  
7 Health' – for example, general or migraine-specific health, was proposed and adoption of a  
8 standardised definition of 'adverse events' (Common Terminology Criteria for Adverse Events  
9 (CTCAE) <sup>24</sup>.

10  
11  
12  
13  
14  
15  
16 The process defined seven core domains common to episodic and chronic migraine (Table 3).  
17 Additionally, episodic migraine included 'self-management'.  
18  
19

## 20 21 **Stage 2: Core Measurement Set**

### 22 ***International expert panel face-to-face meeting***

23  
24 The one-day meeting took place at Warwick University in December 2018. Seven patients (three  
25 with episodic migraine and four with chronic migraine) and seven healthcare  
26 professionals/researchers (two doctors, two nurses, one physiotherapist, two measurement experts)  
27 participated from two countries (UK, Portugal). Ten core group members, including two patient  
28 research partners (GP, BB), attended.  
29  
30  
31

32  
33 **Pain** – was re-defined as migraine-specific pain and endorsed as an inner core domain for  
34 episodic and chronic migraine (>70%) (Table 5; Figure 2). Based on review of existing measures and  
35 group discussion voting supported recommendation of the 11-point numerical rating scale (NRS) for  
36 assessing pain intensity <sup>25</sup> and number of headache/migraine days per month for pain frequency <sup>1,</sup>  
37  
38  
39  
40  
41  
42  
43  
44  
45  
46  
47  
48  
49  
50  
51  
52  
53  
54  
55  
56  
57  
58  
59  
60  
18. Due to the complexities around the concepts of headache and migraine, it was recommended  
that the specific terminologies should be defined by individual studies.

**Overall health** – was re-defined as 'migraine-specific quality of life' (MSQoL), endorsed as an  
inner core domain for both episodic and chronic migraine (Table 5; Figure 2). Presented with  
evidence for generic and migraine quality of life measures, participants preferred the Migraine  
Functional Impact Questionnaire (MFIQ) <sup>2, 26</sup>. The four domain scores of the MFIQ address several  
key concepts highlighted throughout the COSMIG process – including usual activities, physical,  
cognitive, social and emotional function. It also provides a global item score for usual activities.

**Pain duration** and **associated symptoms** were both judged as important, but not feasible for  
inclusion in all trials/research studies and thereby placed in the middle circle (Table 5; Figure 2).

**Self-management** and **Treatment satisfaction** – were both considered important for both episodic and chronic migraine, but lack of conceptualisation and assessment supported their placement on the research agenda (outer circle) (Table 5; Figure 2).

**Cognitive function** and **Usual activities** were both rejected as independent core domains, but proposed as important components of migraine-specific quality of life (Table 5).

**Adverse events** – was rejected as a core domain, with the proposition that such reporting should be part of good clinical practice guidance (Table 5; Figure 2).

Table 5. Consensus meeting: results from small and large group discussions and voting.

| Domain                    | Small group                                                                                                                                                                                                                                                                                                                                                                                                                                                                                                                                                                              | Large group                                                                                                                                                                                                                                                                                                                                                                                                                                          | Final decision <sup>a</sup>                                                                                                                                                                                                                                                                                                                                                                                                                                  |
|---------------------------|------------------------------------------------------------------------------------------------------------------------------------------------------------------------------------------------------------------------------------------------------------------------------------------------------------------------------------------------------------------------------------------------------------------------------------------------------------------------------------------------------------------------------------------------------------------------------------------|------------------------------------------------------------------------------------------------------------------------------------------------------------------------------------------------------------------------------------------------------------------------------------------------------------------------------------------------------------------------------------------------------------------------------------------------------|--------------------------------------------------------------------------------------------------------------------------------------------------------------------------------------------------------------------------------------------------------------------------------------------------------------------------------------------------------------------------------------------------------------------------------------------------------------|
| <b>Pain</b>               | <p><b>Domain</b><br/>Voting supported inclusion of Pain for EM and CM (&gt;70%)<br/>Three aspects of Pain included:</p> <ul style="list-style-type: none"> <li>intensity (11/11)</li> <li>frequency (10/11)</li> <li>duration (8/11)</li> </ul> <p>Proposed domain refinement to ‘Migraine-specific Pain’</p> <p><b>Measurement</b><br/>Voting for individual options did not exceed 70%<br/>Preferred assessments:<br/>Intensity: 11-point NRS (55%)<br/>Frequency: Number of headache/migraine days (64%)<br/>Duration: Cumulative hours per 28-days of moderate/severe pain (55%)</p> | <p><b>Domain</b><br/>INNER core: Migraine-specific pain (no further voting required)</p> <p><b>Measurement</b><br/>Pain intensity: 11-point NRS (80%)<br/><br/>Pain frequency: Number of headache/migraine days (&gt;70%)<br/><br/>Pain duration: No consensus. Proposed that daily capture (using paper or electronic diary) or retrospective capture using a questionnaire may not be feasible for all trials.<br/>Voting: MIDDLE circle (89%)</p> | <p><b>Domain – both EM and CM</b><br/>INNER core : Migraine-specific pain<br/>Components: intensity and frequency</p> <p><b>Measurement</b><br/>Pain intensity – 11-point NRS (anchors ‘no pain’ and ‘pain as bad as you can imagine’)<br/><br/>Pain frequency<br/> <ul style="list-style-type: none"> <li>number of headache / migraine days</li> </ul> <br/>Pain Duration: MIDDLE circle: important but not feasible for all trials / research studies</p> |
| <b>Overall Health</b>     | <p><b>Domain</b><br/>Voting supported redefining domain as Migraine-specific Quality of Life (73%)</p> <p><b>Measurement</b><br/>Migraine Functional Impact Questionnaire (72%)</p>                                                                                                                                                                                                                                                                                                                                                                                                      | <p><b>Domain</b><br/>INNER core: Migraine-specific Quality of Life (no further voting required)</p> <p><b>Measurement</b><br/>Migraine Functional Impact Questionnaire</p>                                                                                                                                                                                                                                                                           | <p><b>Domain – both EM and CM</b><br/>INNER core: Migraine-specific Quality of Life</p> <p><b>Measurement</b><br/>Migraine Functional Impact Questionnaire</p>                                                                                                                                                                                                                                                                                               |
| <b>Adverse Events</b>     | <p><b>Domain</b><br/>Voting supported the rejection of adverse events from the core domain set (82%)</p> <p><b>Measurement</b><br/>N/A</p>                                                                                                                                                                                                                                                                                                                                                                                                                                               | <p><b>Domain</b><br/>Recommendations were supported. Should be captured as part of good clinical practice guidance.</p>                                                                                                                                                                                                                                                                                                                              | Not included in the COS for EM or CM                                                                                                                                                                                                                                                                                                                                                                                                                         |
| <b>Self-management</b>    | <p><b>Domain</b><br/>No consensus on the inclusion (46%) / exclusion (54%) of self-management. Participants considered it to be important to both EM and CM, but requiring greater conceptualisation before it can be accurately measured</p>                                                                                                                                                                                                                                                                                                                                            | <p><b>Domain</b><br/>Group confirmed the importance of self-management for both EM and CM, but agreed that the lack of conceptualisation and method of assessment prevented inclusion in the COS.<br/>Voting: RESEARCH AGENDA (73%)</p>                                                                                                                                                                                                              | <p><b>Domain and measurement – both EM and CM</b><br/>OUTER circle - Research Agenda: important but requiring further study</p>                                                                                                                                                                                                                                                                                                                              |
| <b>Cognitive function</b> | <p><b>Domain</b></p>                                                                                                                                                                                                                                                                                                                                                                                                                                                                                                                                                                     | <p><b>Domain</b><br/>Recommendations supported. The importance of cognitive</p>                                                                                                                                                                                                                                                                                                                                                                      | Not included as a separate core domain for EM or CM.                                                                                                                                                                                                                                                                                                                                                                                                         |



|                               |                                                                                                                                                                                                                                                                  |                                                                                                                                                                                                                                                                                                                                                                                         |                                                                                                                                                                                     |
|-------------------------------|------------------------------------------------------------------------------------------------------------------------------------------------------------------------------------------------------------------------------------------------------------------|-----------------------------------------------------------------------------------------------------------------------------------------------------------------------------------------------------------------------------------------------------------------------------------------------------------------------------------------------------------------------------------------|-------------------------------------------------------------------------------------------------------------------------------------------------------------------------------------|
|                               | Voting supported the rejection of cognitive function as a separate core domain (70%)<br><br>But participants supported cognitive function as an important concept.                                                                                               | function was supported and the potential for it to be captured with migraine-specific quality of life proposed.                                                                                                                                                                                                                                                                         | Cognitive function is included within the new domain 'Migraine-specific Quality of Life' and will be assessed by the MFIQ                                                           |
| <b>Associated symptoms</b>    | <b>Domain</b><br>No consensus on the inclusion (50%) / exclusion (50%) of associated symptoms.<br><br>Participants discussed the importance of a wide range of associated symptoms – but capture of all would not be feasible in all trials (and hence not core) | <b>Domain</b><br>Participants recognised pain as an important 'associated symptom' and the inclusion of several additional associated symptoms within the new domain 'MQoL' (captured by the MFIQ).<br><br>Capturing a larger number of associated symptoms, or specific additional symptoms - such as fatigue - should be study specific and not core.<br>Voting: MIDDLE circle (100%) | <b>Domain and measurement – both EM and CM</b><br>MIDDLE circle: important but not feasible to include in all trials / research studies.                                            |
| <b>Usual activities</b>       | <b>Domain</b><br>Voting supported the inclusion as a component of a new domain 'MQoL' (100%)<br><br><b>Measurement</b><br>Usual activities, as a component of MQoL to be assessed with the MFIQ (80%)                                                            | <b>Domain</b><br>Recommendations were supported<br><br><b>Measurement</b><br>N/A                                                                                                                                                                                                                                                                                                        | Not included as a separate core domain for EM or CM.<br><br>Usual activities is included within the new domain 'Migraine-specific Quality of Life' and will be assessed by the MFIQ |
| <b>Treatment satisfaction</b> | <b>Domain</b><br>Considered important – but no consensus on the inclusion (64%) / exclusion (36%) of treatment satisfaction due to need for greater clarity                                                                                                      | <b>Domain</b><br>Group confirmed the importance of treatment satisfaction for both EM and CM, but agreed that the lack of conceptualisation and method of assessment prevented inclusion in the COS<br>Voting: RESEARCH AGENDA (100%)                                                                                                                                                   | <b>Domain and measurement – both EM and CM</b><br>OUTER circle - Research Agenda: important but requiring further study                                                             |

The result was a two domain Core Outcome Set for both EM and CM (COSMIG) (Table 5; Figure 2):

1) *Migraine-specific pain*: intensity assessed with the 11-point NRS and frequency as the number of headache/migraine days over a specified period; and

2) *Migraine-specific quality of life* – assessed with the MFIQ<sup>26</sup>.

## Discussion

The COSMIG process has identified two core domains - pain and migraine-specific quality of life – that are recommended as part of *a priori*-designated outcomes in future preventive intervention clinical trials for both episodic and chronic migraine. Pain assessment should include both intensity, measured

1  
2  
3 with an 11-point NRS, and frequency, assessed as the number of headache/migraine days per 28 days.  
4  
5 Migraine-specific quality of life should be assessed with the Migraine Functional Impact Questionnaire  
6 (MFIQ) <sup>26</sup>. Complex concepts around headache and migraine meant the group were not able to make  
7  
8 recommendations for the phrasing of questions on pain severity (e.g., worst, average or typical) or the  
9  
10 definition of a migraine/headache day. Thus the specific terminologies should be defined, and  
11  
12 reported, by the needs of individual studies. Likewise the specific timing of assessments should be  
13  
14 driven by the requirements of the study.

15  
16 The group preferred the MFIQ over other measures of migraine related quality of life such as the  
17  
18 Migraine Specific Quality-of-Life Questionnaire MSQv2.1 because participants, in particular patient  
19  
20 participants, felt its domains best reflected the impact migraine has on people's lives. This matches  
21  
22 the aims of the original developers who specifically sought to address gaps in existing patient reported  
23  
24 outcomes <sup>27</sup>. A licence is needed to use the MFIQ available from [Legal@evidera.com](mailto:Legal@evidera.com). The owners  
25  
26 advise us that it will be available free of charge for non-commercial research (email Evidera 15 May  
27  
28 2020, personal communication).

29  
30 Pain duration and associated symptoms are important, but are not considered core. How to assess  
31  
32 self-management and treatment satisfaction requires further research before recommendations can  
33  
34 be made.

35  
36 The COSMIG recommendations contrast with previous guidance for trials of prophylaxis in chronic  
37  
38 migraine that recommend a single primary outcome derived from headache/migraine days. Patient-  
39  
40 reported headache-related quality of life appears last in order of the secondary outcomes <sup>1</sup> and  
41  
42 guidelines for trials of prophylaxis in episodic migraine do not include quality of life as an outcome <sup>13</sup>.

43  
44 Informed by current good practice guidance in core outcome set development <sup>9,14</sup>, this study included  
45  
46 international participation from patient and professional groups in an on-line Delphi study and a  
47  
48 subsequent face-to-face meeting. Whilst individuals from 14 countries were included in the Delphi  
49  
50 study, participants from just two countries (England and Portugal) contributed to the face-to-face  
51  
52 meeting. However, wide international involvement throughout the Delphi study improved  
53  
54 international reach and helps ensure relevance of the recommendations.

55  
56 Active pre-engagement with potential participants in the Delphi study enabled targeted follow-up of  
57  
58 non-responders in round one <sup>28</sup>. The high response rates – approximating 80% - reported for patient  
59  
60 participants, contrasted with the 50% response rates for healthcare professionals completing round  
61  
62 one. This may reflect that the healthcare professionals were asked to complete two questionnaires  
63  
64 (episodic and chronic migraine), whilst patients completed just one. Subsequent response rates for

1  
2  
3 rounds two and three were high, with response rates from both sub-panels exceeding 70%,  
4 paralleling the reduction in length of the questionnaire in both rounds.  
5  
6

7 We relied on participant self-identification of diagnosis of episodic/chronic migraine. Any  
8 misclassification is unlikely to have any substantive impact on our findings. The study included a  
9 broad age-range of patient participants. Similarly, the healthcare professionals involved had a broad  
10 spectrum of experience in the care of patients with migraine and in migraine-related research.  
11  
12  
13

14 Working collaboratively with patient research partners throughout the research contributed to the  
15 crafting of 'meaningful' domains at each stage of the Delphi process, giving validity to the proposed  
16 lists <sup>17</sup>. The initial Delphi questionnaire provided a comprehensive reflection of domains that might  
17 be assessed in chronic or episodic migraine. Additional domains were not proposed by participants  
18 in round one, supporting the comprehensiveness and relevance of content. Patient partners checked  
19 the comprehensibility and relevance of short-listed methods of assessment presented to  
20 participants in the consensus meeting, contributing to the debate and supporting lay participants  
21 during group discussions. All patient partners contributed to manuscript edits throughout the write-  
22 up phase.  
23  
24  
25  
26  
27  
28  
29

30 The recommended COSMIG core set should be complemented by additional trial outcomes  
31 pertinent to the particular intervention being evaluated. However, standardisation of core data  
32 collection is strongly advised to reduce the potential for systematic bias and enhance the quality of  
33 patient-reported outcomes data <sup>8,9</sup>. The remaining discrepancies between patients and healthcare  
34 professionals are important. Patients attached greater importance to fatigue, unpredictability,  
35 emotional impact, cognitive function and self-management and lower prioritisation on concerns  
36 around vomiting/nausea than did professionals. More work is needed on how to evaluate the self-  
37 management and treatment satisfaction domains.  
38  
39  
40  
41  
42  
43  
44

45 Through an international collaboration between patients, researchers and health professionals, we  
46 have facilitated consensus on a Core Outcome Set for reporting on preventative intervention trials  
47 and research studies in adults with episodic or chronic MIGraine (COSMIG). We recommend that  
48 both pain (intensity and frequency) and migraine-specific quality of life are included as core  
49 domains. To support meaningful comparisons across studies, we recommend that pain intensity be  
50 assessed with a NRS <sup>25</sup> and frequency by determining the number of migraine days; migraine-specific  
51 quality of life should be assessed with the MFIQ <sup>26</sup>. The timing of assessments should be determined  
52 by individual studies.  
53  
54  
55  
56  
57  
58  
59  
60

## Author Affiliations

<sup>1</sup> Warwick Research in Nursing, Warwick Medical School, University of Warwick. Coventry CV4 7AL.

<sup>2</sup> Warwick Clinical Trials Unit, Warwick Medical School, University of Warwick. Coventry CV4 7AL.

<sup>3</sup> Institute of Health Sciences, Kristiana University College, Norway.

<sup>4</sup> School of Psychological, Social and Behavioural Sciences, Coventry University.

<sup>5</sup> Department of Neurology, Albert Einstein College of Medicine, USA.

<sup>6</sup> Nuffield Department of Primary Care, Oxford University, Oxford.

<sup>7</sup> Outcomes Insight Consulting, QualityMetric Inc.

<sup>8</sup> Neurology Department, St George's University Hospitals NHS Foundation Trust.

<sup>9</sup> The Headache Group, National Hospital for Neurology and Neurosurgery, University College London Hospitals NHS Foundation.

## Acknowledgements

We are very grateful to members of the International Steering Group (RL, RJ) for their oversight of the study. We are very grateful to everyone who participate in the Delphi study and attended the consensus meeting.

## Competing interests

MU and RF are directors and shareholders of Clinvivo Ltd. MU recused himself from any discussions related to the choice of Delphi platform for this study. MU is chief investigator or co-investigator on multiple previous and current research grants from the UK National Institute for Health Research, Arthritis Research UK and is a co-investigator on grants funded by the Australian NHMRC. He is an NIHR Senior Investigator. He has received travel expenses for speaking at conferences from the professional organisations hosting the conferences. MU and RF are part of an academic partnership with Serco Ltd related to return to work initiatives. MU is a co-investigator on two NIHR funded studies receiving additional support from Stryker Ltd. He has accepted honoraria for teaching/lecturing from CARTA. He was an editor of the NIHR journal series, and a member of the NIHR Journal Editors Group, for which he received a fee.

1  
2  
3 MSM serves on the advisory board for Abbott, Allergan, Eli Lilly, Medtronic, Novartis, TEVA; has  
4 received payment for the development of educational presentations from Allergan, electroCore, Eli  
5 Lilly, Medtronic, Novartis, and TEVA; and, has received research grants from Abbott, electroCore and  
6 Medtronic  
7  
8  
9

10 SP is a director of Health Psychology Services Ltd which, in part, provides psychological treatments  
11 for those with chronic pain.  
12  
13

14 No other competing interests declared.  
15  
16  
17

### 18 19 **Funding Statement**

20 This study was funded by the National Institute for Health Research (NIHR) Programme Grants for  
21 Applied Research programme (RP-PG-1212-20018). The views expressed are those of the author(s)  
22 and not necessarily those of the NIHR or the Department of Health and Social Care.  
23  
24  
25

26 Active collaboration with our patient research partners was supported by a 'Delivering Results  
27 Award' (IAS/23022/16) from the Institute of Advanced Studies, Warwick University.  
28  
29  
30

### 31 32 33 **Data sharing statement**

34 De-identified data will be shared through the university accessible databases or repositories at  
35 Warwick University. Please contact Dr KH if additional information is required: email  
36 k.l.haywood@warwick.ac.uk  
37  
38  
39  
40  
41  
42  
43

### 44 45 **Authors' contribution**

46 KH, MM, MU, RP, RF, RL, BD, SPe, SPa, VN, BB, LM and GP made substantial contributions to the  
47 conception and design of the study. KH, MM, BD, RF, RP, RL, SPe, BB, LM, GP and MU made  
48 substantial contributions to developing the protocol. KH, MM, MU, RP, RF, RL, RB, SPe, SPa, VN, KS,  
49 BB, LM and GP made substantial contributions to the acquisition of data, analysis and interpretation  
50 of data. All authors have been involved in drafting the manuscript or revising it critically for  
51 important intellectual content; given final approval of the version to be published.  
52  
53  
54  
55  
56  
57  
58  
59  
60

## References

1. Tassorelli C, Diener HC, Dodick DW, et al. Guidelines of the International Headache Society for controlled trials of preventive treatment of chronic migraine in adults. *Cephalalgia : an international journal of headache* 2018; 38: 815-832. 2018/03/06. DOI: 10.1177/0333102418758283.
2. Haywood KL, Mars TS, Potter R, et al. Assessing the impact of headaches and the outcomes of treatment: A systematic review of patient-reported outcome measures (PROMs). *Cephalalgia : an international journal of headache* 2018; 38: 1374-1386. 2017/09/19. DOI: 10.1177/0333102417731348.
3. Probyn K, Bowers H, Caldwell F, et al. Prognostic factors for chronic headache: A systematic review. *Neurology* 2017; 89: 291-301. 2017/06/16. DOI: 10.1212/wnl.0000000000004112.
4. Clarke M. Standardising outcomes for clinical trials and systematic reviews. *Trials* 2007; 8: 39. DOI: 10.1186/1745-6215-8-39.
5. Kirkham JJ, Gargon E, Clarke M, et al. Can a core outcome set improve the quality of systematic reviews?--a survey of the Co-ordinating Editors of Cochrane Review Groups. *Trials* 2013; 14: 21. 2013/01/24. DOI: 10.1186/1745-6215-14-21.
6. Jackson JL, Cogbill E, Santana-Davila R, et al. A Comparative Effectiveness Meta-Analysis of Drugs for the Prophylaxis of Migraine Headache. *PLoS One* 2015; 10: e0130733. 2015/07/15. DOI: 10.1371/journal.pone.0130733.
7. Silberstein SD, Lipton RB, Dodick DW, et al. Efficacy and safety of topiramate for the treatment of chronic migraine: a randomized, double-blind, placebo-controlled trial. *Headache* 2007; 47: 170-180. 2007/02/16. DOI: 10.1111/j.1526-4610.2006.00684.x.
8. Kirkham JJ, Dwan KM, Altman DG, et al. The impact of outcome reporting bias in randomised controlled trials on a cohort of systematic reviews. *BMJ (Clinical research ed)* 2010; 340: c365. 2010/02/17. DOI: 10.1136/bmj.c365.
9. Williamson PR, Altman DG, Bagley H, et al. The COMET Handbook: version 1.0. *Trials* 2017; 18: 280. 2017/07/07. DOI: 10.1186/s13063-017-1978-4.
10. Williamson PR, Altman DG, Blazeby JM, et al. Developing core outcome sets for clinical trials: issues to consider. *Trials* 2012; 13: 132. DOI: 10.1186/1745-6215-13-132.
11. Gorst SL, Gargon E, Clarke M, et al. Choosing Important Health Outcomes for Comparative Effectiveness Research: An Updated Review and User Survey. *PLOS ONE* 2016; 11: e0146444. DOI: 10.1371/journal.pone.0146444.
12. Tunis SR, Clarke M, Gorst SL, et al. Improving the relevance and consistency of outcomes in comparative effectiveness research. *Journal of comparative effectiveness research* 2016; 5: 193-205. 2016/03/02. DOI: 10.2217/cer-2015-0007.
13. Tfelt-Hansen P, Pascual J, Ramadan N, et al. Guidelines for controlled trials of drugs in migraine: third edition. A guide for investigators. *Cephalalgia : an international journal of headache* 2012; 32: 6-38. 2012/03/03. DOI: 10.1177/0333102411417901.
14. Boers M, Kirwan JR, Wells G, et al. Developing core outcome measurement sets for clinical trials: OMERACT filter 2.0. *Journal of clinical epidemiology* 2014; 67: 745-753. 2014/03/04. DOI: 10.1016/j.jclinepi.2013.11.013.
15. Ward F, Popay J, Porroche-Escudero A, et al. Mainstreaming public involvement in a complex research collaboration: A theory-informed evaluation. 2020; n/a. DOI: 10.1111/hex.13070.



16. Nichols VP, Ellard DR, Griffiths FE, et al. The lived experience of chronic headache: a systematic review and synthesis of the qualitative literature. 2017; 7: e019929. DOI: 10.1136/bmjopen-2017-019929 %J BMJ Open.
17. Orbai AM, de Wit M, Mease P, et al. International patient and physician consensus on a psoriatic arthritis core outcome set for clinical trials. *Annals of the rheumatic diseases* 2017; 76: 673-680. 2016/09/11. DOI: 10.1136/annrheumdis-2016-210242.
18. International Headache Society. ICHD / Guidelines, <http://www.ihs-headache.org/ichd-guidelines> (April 2020).
19. The National Institute of Neurological Disorders and Stroke (NINDS). Common Data Standards - Headache, <https://www.commondataelements.ninds.nih.gov/headache> (accessed 01/04/2020).
20. Dworkin RH, Turk DC, Farrar JT, et al. Core outcome measures for chronic pain clinical trials: IMMPACT recommendations. *Pain* 2005; 113: 9-19. 2004/12/29. DOI: 10.1016/j.pain.2004.09.012.
21. Turk DC, Dworkin RH, Allen RR, et al. Core outcome domains for chronic pain clinical trials: IMMPACT recommendations. *Pain* 2003; 106: 337-345. 2003/12/09. DOI: 10.1016/j.pain.2003.08.001.
22. IMMPACT. Initiative on Methods, Measurement, and Pain Assessment in Clinical Trials, <http://www.immpact.org/> (accessed April 2020).
23. Tugwell P, Boers M, Brooks P, et al. OMERACT: an international initiative to improve outcome measurement in rheumatology. *Trials* 2007; 8: 38. 2007/11/28. DOI: 10.1186/1745-6215-8-38.
24. Institute NC. Common Terminology Criteria for Adverse Events (CTCAE), [https://ctep.cancer.gov/protocoldevelopment/electronic\\_applications/ctc.htm](https://ctep.cancer.gov/protocoldevelopment/electronic_applications/ctc.htm) (accessed April 2020).
25. Hjerstad MJ, Fayers PM, Haugen DF, et al. Studies comparing Numerical Rating Scales, Verbal Rating Scales, and Visual Analogue Scales for assessment of pain intensity in adults: a systematic literature review. *Journal of pain and symptom management* 2011; 41: 1073-1093. 2011/05/31. DOI: 10.1016/j.jpainsymman.2010.08.016.
26. Hareendran A, Skalicky A, Mannix S, et al. Development of a New Tool for Evaluating the Benefit of Preventive Treatments for Migraine on Functional Outcomes – The Migraine Functional Impact Questionnaire (MFIQ). 2018; 58: 1612-1628. DOI: 10.1111/head.13420.
27. Kawata AK, Hareendran A, Shaffer S, et al. Evaluating the Psychometric Properties of the Migraine Functional Impact Questionnaire (MFIQ). *Headache* 2019; 59: 1253-1269. 2019/06/07. DOI: 10.1111/head.13569.
28. Gargon E, Gorst SL and Williamson PR. Choosing important health outcomes for comparative effectiveness research: 5th annual update to a systematic review of core outcome sets for research. *PloS one* 2019; 14: e0225980-e0225980. DOI: 10.1371/journal.pone.0225980.

Figure 1: Flow diagram outlining the development stages for the COSMIG

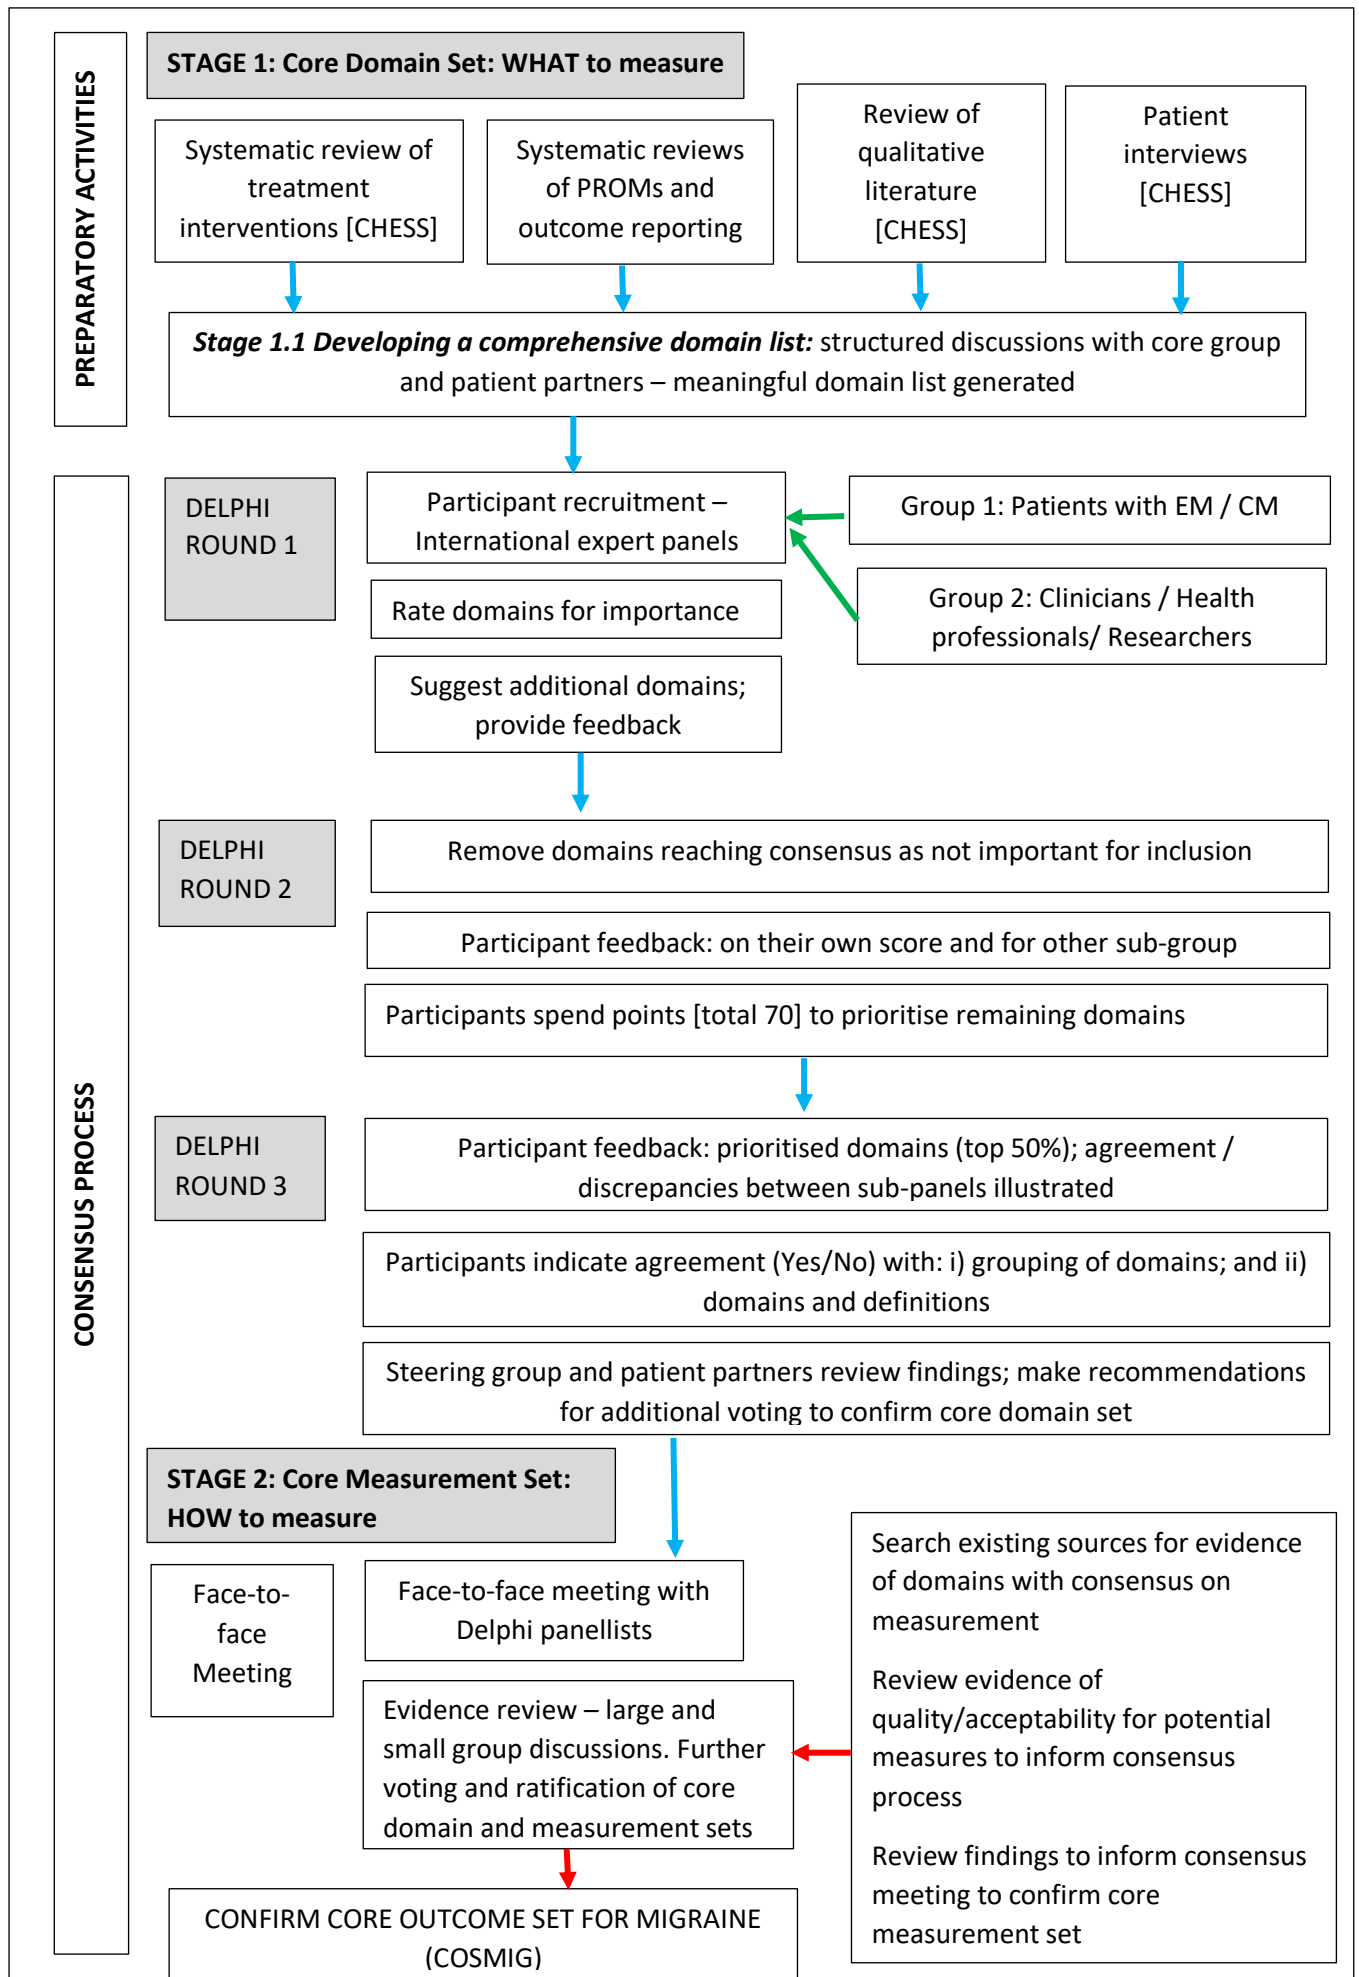



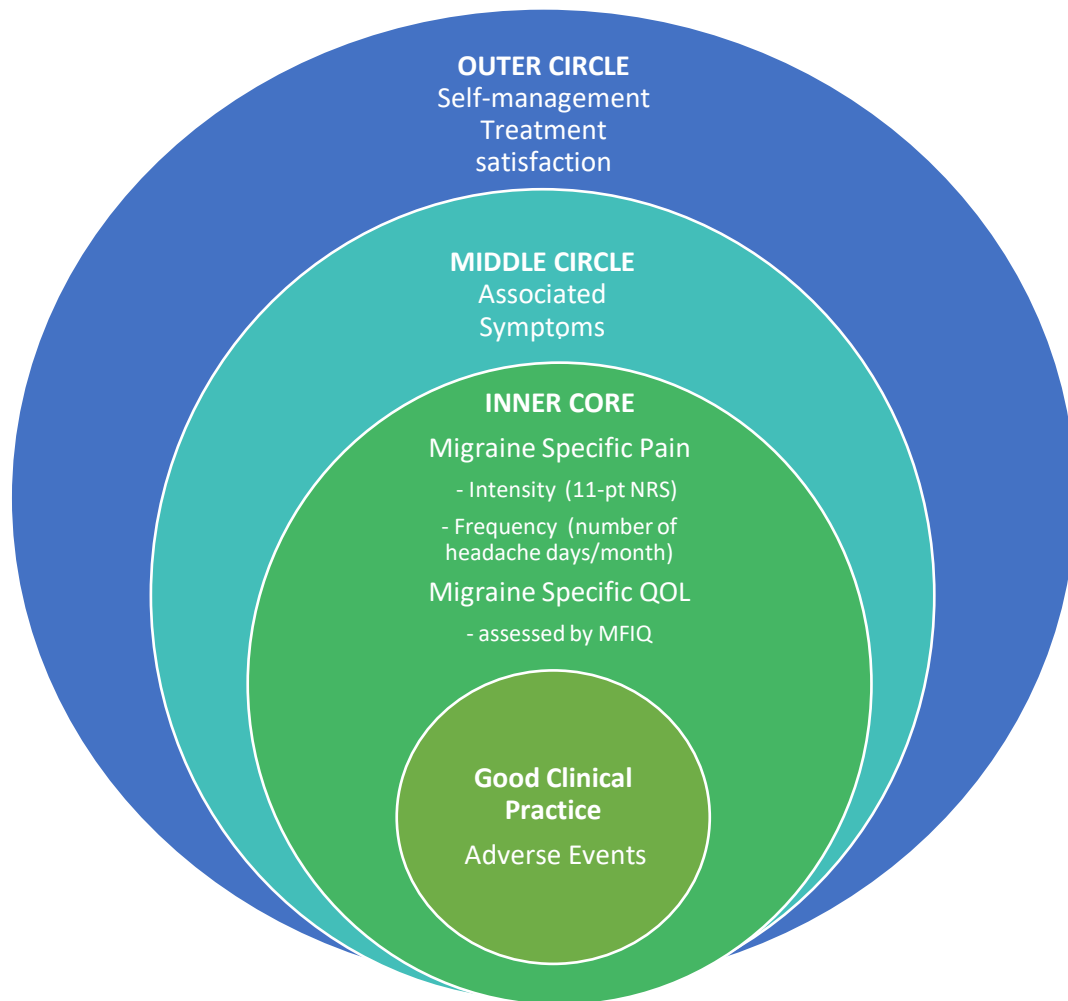

**Figure 2. The Core Outcome Set for Episodic and Chronic Migraine (COSMIG):**

*Footnote: Core 'inner' circle: domain is unambiguous with an acceptable method of assessment; Middle circle: domain is important, but not feasible for all preventative trials and research studies; Outer circle: domain is important, but requires further study (research agenda).*

## APPENDIX

Appendix Table 1. Bespoke grading system to illustrate where consensus was achieved in the Delphi Round 1 for reviewed domains.

| Grade       | Level of agreement between groups                                                                                               | Decision rule                                                                                                                 |
|-------------|---------------------------------------------------------------------------------------------------------------------------------|-------------------------------------------------------------------------------------------------------------------------------|
| <b>A **</b> | If in both groups the median rating is 9                                                                                        | Include domain in Round 2                                                                                                     |
| <b>A*</b>   | If in both groups $\geq 70\%$ rate a domain $\geq 7$                                                                            | Include domain in Round 2                                                                                                     |
| <b>A</b>    | If in both groups the median domain rating is $\geq 7$                                                                          | Include domain in Round 2 if either group achieves a median score of 9 OR qualitative evidence supports further consideration |
| <b>B</b>    | If the median rating for a domain is $\geq 7$ in only one group                                                                 | Include domain in Round 2 if either group achieves a median score of 9 OR qualitative evidence supports further consideration |
| <b>C</b>    | If the median rating for the two groups combined is $\geq 4$ and $\leq 6$ and the median rating for no single group is $\leq 7$ | No progression to Round 2 (unless qualitative evidence supports further consideration)                                        |
| <b>D</b>    | If the median rating for the two groups combined is $\geq 1$ and $\leq 3$ and the median rating for no single group is $\leq 7$ | No progression to Round 2 (unless qualitative evidence supports further consideration)                                        |

Footnote: 'both groups' refers to – patient group and professionals group

1  
2  
3  
4  
5  
6  
7  
8  
9  
10  
11  
12  
13  
14  
15  
16  
17  
18  
19  
20  
21  
22  
23  
24  
25  
26  
27  
28  
29  
30  
31  
32  
33  
34  
35  
36  
37  
38  
39  
40  
41  
42  
43  
44  
45  
46

Appendix Table 2. Background of professional participants in the Delphi process (Round 1).

|                                          | Chronic round | Episodic round |
|------------------------------------------|---------------|----------------|
| Clinician                                | 6             | 5              |
| Neurologist                              | 13            | 12             |
| Neurologist specialist interest headache | 10            | 11             |
| GP specialist interest headache          | 1             | 0              |
| Nurse specialist                         | 4             | 3              |
| Chiro/osteopath/                         | 2             | 1              |
| Health Economist                         | 2             | 1              |
| Clinical Academic                        | 8             | 9              |
| Other health professional academic       | 2             | 0              |
| Clinical Trialist                        | 9             | 8              |
| Systematic reviewer                      | 6             | 5              |
| Measurement expert                       | 7             | 8              |

Footnote: participants could identify as having more than one background

Appendix Table 3. Delphi Round 3: results of voting on sub-panel discrepancies.

| Outcome to be voted on (R3)                                            |                                                                                                                       |    | EPISODIC MIGRAINE<br>Voting |                |                    | CHRONIC MIGRAINE<br>Voting |                |                    |
|------------------------------------------------------------------------|-----------------------------------------------------------------------------------------------------------------------|----|-----------------------------|----------------|--------------------|----------------------------|----------------|--------------------|
| Discrepancies<br>(outcomes rated in top 50% by one sub-panel)          | Proposed Domain and definition                                                                                        | Q  | Patient<br>(n=23)           | HCPs<br>(n=21) | Combined<br>(n=44) | Patient<br>(n=29)          | HCPs<br>(n=23) | Combined<br>(n=52) |
| <i>Ranked highly by healthcare professionals (HCPs)</i>                |                                                                                                                       |    |                             |                |                    |                            |                |                    |
| • HCP 9/27; Patients 20/27 (EM)                                        | • <b>Satisfaction with Treatment</b>                                                                                  | a. | 65.2%                       | <b>71.4%</b>   | 68.2%              | -                          | -              | -                  |
| • HCP 8/27; Patients 25/27 (EM)                                        | • <b>Vomiting and/ feelings of nausea</b>                                                                             | a. | 60.9%                       | <b>71.4%</b>   | 65.9%              | -                          | -              | -                  |
| • HCP 12/27; Patients 18/27 (EM)                                       | • Type (potency) and dose (how much) of a medication when experiencing a migraine                                     | a. |                             |                |                    | -                          | -              | -                  |
| • HCP 10/31; Patients 20/31 (CM)                                       | • Stress – feelings of distress, frustration or irritation                                                            | a. | -                           | -              | -                  | 58.6%                      | 47.8%          | 53.9%              |
| • HCP 15/31; Patients 29/31 (CM)                                       | • Mortality (death)                                                                                                   | a. | -                           | -              | -                  | 20.7%                      | 17.4%          | 19.2%              |
| <i>Ranked highly by patients</i>                                       |                                                                                                                       |    |                             |                |                    |                            |                |                    |
| • Patients 10/27; HCPs 21/27 (EM)<br>• Patients 14/31; HCPs 31/31 (CM) | • <b>Unpredictability of a migraine – uncertainty of being symptom-free or able to engage in activities</b>           | a. | <b>82.6%</b>                | 61.9%          | <b>72.7%</b>       | <b>96.6%</b>               | <b>69.6%</b>   | <b>84.6%</b>       |
| • Patients 11/27; HCPs 23/27 (EM)                                      | • <b>Physical fatigue – experiencing physical fatigue, tiredness, lacking in energy, feeling physically exhausted</b> | a. | <b>69.6%</b>                | 52.4%          | 61.4%              | -                          | -              | -                  |
| • Patients 10/27; HCPs 21/27 (EM)                                      | • <b>Depressive mood – feeling sad, feeling down, feeling sorry for oneself, or feeling depressed</b>                 | a. | <b>69.6%</b>                | 42.9%          | 56.8%              | -                          | -              | -                  |

Footnote: Panellists were asked to indicate (Yes/No): a. Should the following outcomes be included in a core set for studies of EM / CM (respectively)?

Table 7. Consensus meeting: results from small and large group discussions and voting.

| Domain                 | Small group                                                                                                                                                                                                                                                                                                                                                                                                                                                                                                                                                                                    | Large group                                                                                                                                                                                                                                                                                                                                                                                                                                          | Final decision <sup>a</sup>                                                                                                                                                                                                                                                                                                                                                                                                                                    |
|------------------------|------------------------------------------------------------------------------------------------------------------------------------------------------------------------------------------------------------------------------------------------------------------------------------------------------------------------------------------------------------------------------------------------------------------------------------------------------------------------------------------------------------------------------------------------------------------------------------------------|------------------------------------------------------------------------------------------------------------------------------------------------------------------------------------------------------------------------------------------------------------------------------------------------------------------------------------------------------------------------------------------------------------------------------------------------------|----------------------------------------------------------------------------------------------------------------------------------------------------------------------------------------------------------------------------------------------------------------------------------------------------------------------------------------------------------------------------------------------------------------------------------------------------------------|
| <b>Pain</b>            | <p><b>Domain</b><br/>Voting supported inclusion of Pain for EM and CM (&gt;70%)<br/>Three aspects of Pain included:</p> <ul style="list-style-type: none"> <li>• intensity (11/11)</li> <li>• frequency (10/11)</li> <li>• duration (8/11)</li> </ul> <p>Proposed domain refinement to ‘Migraine-specific Pain’</p> <p><b>Measurement</b><br/>Voting for individual options did not exceed 70%<br/>Preferred assessments:<br/>Intensity: 11-point NRS (55%)<br/>Frequency: Number of headache/migraine days (64%)<br/>Duration: Cumulative hours per 28-days of moderate/severe pain (55%)</p> | <p><b>Domain</b><br/>INNER core: Migraine-specific pain (no further voting required)</p> <p><b>Measurement</b><br/>Pain intensity: 11-point NRS (80%)<br/><br/>Pain frequency: Number of headache/migraine days (&gt;70%)<br/><br/>Pain duration: No consensus. Proposed that daily capture (using paper or electronic diary) or retrospective capture using a questionnaire may not be feasible for all trials.<br/>Voting: MIDDLE circle (89%)</p> | <p><b>Domain – both EM and CM</b><br/>INNER core : Migraine-specific pain<br/>Components: intensity and frequency</p> <p><b>Measurement</b><br/>Pain intensity – 11-point NRS (anchors ‘no pain’ and ‘pain as bad as you can imagine’)<br/><br/>Pain frequency<br/> <ul style="list-style-type: none"> <li>• number of headache / migraine days</li> </ul> <br/>Pain Duration: MIDDLE circle: important but not feasible for all trials / research studies</p> |
| <b>Overall Health</b>  | <p><b>Domain</b><br/>Voting supported redefining domain as Migraine-specific Quality of Life (73%)</p> <p><b>Measurement</b><br/>Migraine Functional Impact Questionnaire (72%)</p>                                                                                                                                                                                                                                                                                                                                                                                                            | <p><b>Domain</b><br/>INNER core: Migraine-specific Quality of Life (no further voting required)</p> <p><b>Measurement</b><br/>Migraine Functional Impact Questionnaire</p>                                                                                                                                                                                                                                                                           | <p><b>Domain – both EM and CM</b><br/>INNER core: Migraine-specific Quality of Life</p> <p><b>Measurement</b><br/>Migraine Functional Impact Questionnaire</p>                                                                                                                                                                                                                                                                                                 |
| <b>Adverse Events</b>  | <p><b>Domain</b><br/>Voting supported the rejection of adverse events from the core domain set (82%)</p> <p><b>Measurement</b><br/>N/A</p>                                                                                                                                                                                                                                                                                                                                                                                                                                                     | <p><b>Domain</b><br/>Recommendations were supported. Should be captured as part of good clinical practice guidance.</p>                                                                                                                                                                                                                                                                                                                              | <p>Not included in the COS for EM or CM</p>                                                                                                                                                                                                                                                                                                                                                                                                                    |
| <b>Self-management</b> | <p><b>Domain</b><br/>No consensus on the inclusion (46%) / exclusion (54%) of self-management. Participants considered it to be important to both EM and CM, but requiring greater conceptualisation before it can be accurately measured</p>                                                                                                                                                                                                                                                                                                                                                  | <p><b>Domain</b><br/>Group confirmed the importance of self-management for both EM and CM, but agreed that the lack of conceptualisation and method of assessment prevented inclusion in the COS.<br/>Voting: RESEARCH AGENDA (73%)</p>                                                                                                                                                                                                              | <p><b>Domain and measurement – both EM and CM</b><br/>OUTER circle - Research Agenda: important but requiring further study</p>                                                                                                                                                                                                                                                                                                                                |

|                               |                                                                                                                                                                                                                                                                          |                                                                                                                                                                                                                                                                                                                                                                                                  |                                                                                                                                                                                              |
|-------------------------------|--------------------------------------------------------------------------------------------------------------------------------------------------------------------------------------------------------------------------------------------------------------------------|--------------------------------------------------------------------------------------------------------------------------------------------------------------------------------------------------------------------------------------------------------------------------------------------------------------------------------------------------------------------------------------------------|----------------------------------------------------------------------------------------------------------------------------------------------------------------------------------------------|
| <b>Cognitive function</b>     | <p><b>Domain</b><br/>Voting supported the rejection of cognitive function as a separate core domain (70%)</p> <p>But participants supported cognitive function as an important concept.</p>                                                                              | <p><b>Domain</b><br/>Recommendations supported. The importance of cognitive function was supported and the potential for it to be captured with migraine-specific quality of life proposed.</p>                                                                                                                                                                                                  | <p>Not included as a separate core domain for EM or CM.</p> <p>Cognitive function is included within the new domain 'Migraine-specific Quality of Life' and will be assessed by the MFIQ</p> |
| <b>Associated symptoms</b>    | <p><b>Domain</b><br/>No consensus on the inclusion (50%) / exclusion (50%) of associated symptoms.</p> <p>Participants discussed the importance of a wide range of associated symptoms – but capture of all would not be feasible in all trials (and hence not core)</p> | <p><b>Domain</b><br/>Participants recognised pain as an important 'associated symptom' and the inclusion of several additional associated symptoms within the new domain 'MQoL' (captured by the MFIQ).</p> <p>Capturing a larger number of associated symptoms, or specific additional symptoms - such as fatigue - should be study specific and not core.<br/>Voting: MIDDLE circle (100%)</p> | <p><b>Domain and measurement – both EM and CM</b><br/>MIDDLE circle: important but not feasible to include in all trials / research studies.</p>                                             |
| <b>Usual activities</b>       | <p><b>Domain</b><br/>Voting supported the inclusion as a component of a new domain 'MQoL' (100%)</p> <p><b>Measurement</b><br/>Usual activities, as a component of MQoL to be assessed with the MFIQ (80%)</p>                                                           | <p><b>Domain</b><br/>Recommendations were supported</p> <p><b>Measurement</b><br/>N/A</p>                                                                                                                                                                                                                                                                                                        | <p>Not included as a separate core domain for EM or CM.</p> <p>Usual activities is included within the new domain 'Migraine-specific Quality of Life' and will be assessed by the MFIQ</p>   |
| <b>Treatment satisfaction</b> | <p><b>Domain</b><br/>Considered important – but no consensus on the inclusion (64%) / exclusion(36%) of treatment satisfaction due to need for greater clarity</p>                                                                                                       | <p><b>Domain</b><br/>Group confirmed the importance of treatment satisfaction for both EM and CM, but agreed that the lack of conceptualisation and method of assessment prevented inclusion in the COS<br/>Voting: RESEARCH AGENDA (100%)</p>                                                                                                                                                   | <p><b>Domain and measurement – both EM and CM</b><br/>OUTER circle - Research Agenda: important but requiring further study</p>                                                              |

Footnote: <sup>a</sup> *Core 'inner' circle*: domain is unambiguous with an acceptable method of assessment; *Middle circle*: domain is important, but not feasible for all preventative trials and research studies; *Outer circle*: domain is important, but requires further study (research agenda) – e.g. lacks conceptual clarity or method of assessment.

1  
2  
3  
4  
5  
6  
7  
8  
9  
10  
11  
12  
13  
14  
15  
16  
17  
18  
19  
20  
21  
22  
23  
24  
25  
26  
27  
28  
29  
30  
31  
32  
33  
34  
35  
36  
37  
38  
39  
40  
41  
42  
43  
44  
45  
46

For peer review only

# BMJ Open

## A Core Outcome Set for Preventive Intervention Trials in Chronic and Episodic Migraine (COSMIG): An international, consensus-derived and multi-stakeholder initiative.

|                                 |                                                                                                                                                                                                                                                                                                                                                                                                                                                                                                                                                                                                                                                                                                                                                                                                                                                                                                                                                                                                                                                                                                                                                                                                       |
|---------------------------------|-------------------------------------------------------------------------------------------------------------------------------------------------------------------------------------------------------------------------------------------------------------------------------------------------------------------------------------------------------------------------------------------------------------------------------------------------------------------------------------------------------------------------------------------------------------------------------------------------------------------------------------------------------------------------------------------------------------------------------------------------------------------------------------------------------------------------------------------------------------------------------------------------------------------------------------------------------------------------------------------------------------------------------------------------------------------------------------------------------------------------------------------------------------------------------------------------------|
| Journal:                        | <i>BMJ Open</i>                                                                                                                                                                                                                                                                                                                                                                                                                                                                                                                                                                                                                                                                                                                                                                                                                                                                                                                                                                                                                                                                                                                                                                                       |
| Manuscript ID                   | bmjopen-2020-043242.R1                                                                                                                                                                                                                                                                                                                                                                                                                                                                                                                                                                                                                                                                                                                                                                                                                                                                                                                                                                                                                                                                                                                                                                                |
| Article Type:                   | Original research                                                                                                                                                                                                                                                                                                                                                                                                                                                                                                                                                                                                                                                                                                                                                                                                                                                                                                                                                                                                                                                                                                                                                                                     |
| Date Submitted by the Author:   | 04-May-2021                                                                                                                                                                                                                                                                                                                                                                                                                                                                                                                                                                                                                                                                                                                                                                                                                                                                                                                                                                                                                                                                                                                                                                                           |
| Complete List of Authors:       | Haywood, Kirstie; University of Warwick Warwick Medical School, Warwick Research in Nursing<br>Potter, Rachel; University of Warwick Warwick Medical School, Clinical Trials Unit<br>Froud, Robert; Kristiania University College, Institute of Health Sciences<br>Pearce, Gemma; Coventry University Department of Psychology and Behavioural Sciences<br>Box, Barbara; University of Warwick Warwick Medical School, Clinical Trials Unit<br>Muldoon, Lynne; University of Warwick, Clinical Trials Unit, Warwick Medical School<br>Lipton, Richard; Albert Einstein College of Medicine Department of Neurology, Department of Neurology<br>Petrou, Stavros; Nuffield Department of Primary Care Health Sciences, Rendas-Baum, Regina; QualityMetric, Outcomes Insight Consulting<br>Logan, Anne-Marie; St George's University Hospitals NHS Foundation Trust<br>Stewart, Kimberley; University of Warwick Warwick Medical School, Clinical Trials Unit<br>Underwood, Martin; University of Warwick Warwick Medical School, Clinical Trials Unit<br>Matharu, Manjit; University College London Hospitals NHS Foundation Trust National Hospital for Neurology and Neurosurgery, The Headache Group |
| <b>Primary Subject Heading</b>: | Neurology                                                                                                                                                                                                                                                                                                                                                                                                                                                                                                                                                                                                                                                                                                                                                                                                                                                                                                                                                                                                                                                                                                                                                                                             |
| Secondary Subject Heading:      | Research methods                                                                                                                                                                                                                                                                                                                                                                                                                                                                                                                                                                                                                                                                                                                                                                                                                                                                                                                                                                                                                                                                                                                                                                                      |
| Keywords:                       | Migraine < NEUROLOGY, STATISTICS & RESEARCH METHODS, Clinical trials < THERAPEUTICS                                                                                                                                                                                                                                                                                                                                                                                                                                                                                                                                                                                                                                                                                                                                                                                                                                                                                                                                                                                                                                                                                                                   |
|                                 |                                                                                                                                                                                                                                                                                                                                                                                                                                                                                                                                                                                                                                                                                                                                                                                                                                                                                                                                                                                                                                                                                                                                                                                                       |

SCHOLARONE™  
Manuscripts



1  
2  
3  
4  
5  
6  
7  
8  
9  
10  
11  
12  
13  
14  
15  
16  
17  
18  
19  
20  
21  
22  
23  
24  
25  
26  
27  
28  
29  
30  
31  
32  
33  
34  
35  
36  
37  
38  
39  
40  
41  
42  
43  
44  
45  
46  
47  
48  
49  
50  
51  
52  
53  
54  
55  
56  
57  
58  
59  
60



I, the Submitting Author has the right to grant and does grant on behalf of all authors of the Work (as defined in the below author licence), an exclusive licence and/or a non-exclusive licence for contributions from authors who are: i) UK Crown employees; ii) where BMJ has agreed a CC-BY licence shall apply, and/or iii) in accordance with the terms applicable for US Federal Government officers or employees acting as part of their official duties; on a worldwide, perpetual, irrevocable, royalty-free basis to BMJ Publishing Group Ltd ("BMJ") its licensees and where the relevant Journal is co-owned by BMJ to the co-owners of the Journal, to publish the Work in this journal and any other BMJ products and to exploit all rights, as set out in our [licence](#).

The Submitting Author accepts and understands that any supply made under these terms is made by BMJ to the Submitting Author unless you are acting as an employee on behalf of your employer or a postgraduate student of an affiliated institution which is paying any applicable article publishing charge ("APC") for Open Access articles. Where the Submitting Author wishes to make the Work available on an Open Access basis (and intends to pay the relevant APC), the terms of reuse of such Open Access shall be governed by a Creative Commons licence – details of these licences and which [Creative Commons](#) licence will apply to this Work are set out in our licence referred to above.

Other than as permitted in any relevant BMJ Author's Self Archiving Policies, I confirm this Work has not been accepted for publication elsewhere, is not being considered for publication elsewhere and does not duplicate material already published. I confirm all authors consent to publication of this Work and authorise the granting of this licence.

1  
2  
3  
4  
5 **A Core Outcome Set for Preventive Intervention Trials in Chronic and Episodic Migraine (COSMIG):**  
6 **An international, consensus-derived and multi-stakeholder initiative.**  
7

8  
9 Haywood K<sup>1</sup>, Potter R<sup>2</sup>, Froud R<sup>2,3</sup>, Pearce G<sup>2,4</sup>, Box B<sup>2</sup>, Muldoon L<sup>2</sup>, Lipton RB<sup>5</sup>, Petrou S<sup>6</sup>, Rendas-  
10 Baum R<sup>7</sup>, Logan A<sup>8</sup>, Stewart K<sup>2</sup>, Underwood M<sup>2</sup>, Matharu M<sup>9</sup>; on behalf of the CHES COSMIG group.  
11  
12

13 **Author Affiliations**

14  
15 <sup>1</sup> Warwick Research in Nursing, Warwick Medical School, University of Warwick. Coventry CV4 7AL.

16  
17 <sup>2</sup> Warwick Clinical Trials Unit, Warwick Medical School, University of Warwick. Coventry CV4 7AL.

18  
19 <sup>3</sup> Institute of Health Sciences, Kristiana University College, Norway.

20  
21 <sup>4</sup> School of Psychological, Social and Behavioural Sciences, Coventry University. CV1 5FB

22  
23 <sup>5</sup> Department of Neurology, Albert Einstein College of Medicine and the Montefiore Headache  
24 Center, Bronx NY, USA.

25  
26 <sup>6</sup> Nuffield Department of Primary Care, Oxford University, Oxford.

27  
28 <sup>7</sup> Outcomes Insight Consulting, QualityMetric Inc.

29  
30 <sup>8</sup> Neurology Department, St George's University Hospitals NHS Foundation Trust.

31  
32 <sup>9</sup> The Headache and Facial Pain Group, Queen's Square Institute of Neurology and the National  
33 Hospital for Neurology and Neurosurgery, University College London Hospitals NHS Foundation.  
34 London. WC1N 3BG.

35  
36 ***COSMIG Core Group:***

37 Kirstie Haywood

38 Martin Underwood

39 Manjit Matharu

40 Brendan Davies

41 Rachel Potter

42 Stavros Petrou

43 Barbara Box

44 Gemma Pearce

45 Lynne Muldoon

46 Richard Lipton

47 Rigor Jensen

48 Vivien Nichols

49 Shilpa Patel

50 Kimberley Stewart  
51  
52  
53  
54

55 Corresponding author: Dr Rachel Potter r.potter@warwick.ac.uk  
56  
57  
58  
59  
60

**Main Text (4270)**

Figure 1. Flow diagram outlining the development stages for the COSMIG

Figure 2. COSMIG: Core Outcome Set for Episodic and Chronic MIGraine.

Table 1. Delphi Round 1 Shortlisted domains

Table 2a. Delphi Round 2. Results of domain prioritisation for Episodic Migraine (combined panels)

Table 2b. Delphi Round 2. Results of domain prioritisation for Chronic Migraine (combined panels)

Table 3. Delphi Round 3. Results of voting for domains for episodic and chronic migraine

Table 4. Consensus meeting: results from small and large group discussions and voting.

**Appendix**

Appendix Table 1. Bespoke grading system to illustrate where consensus was achieved in the Delphi Round 1 for reviewed domains.

Appendix Table 2. Background of professional participants (expert panel) in the Delphi process (Round 1).

Appendix Table 3. Delphi Round 3. Results of voting on sub-panel discrepancies.

**ABSTRACT** (249/300 words)

Objective: Typically, migraine prevention trials focus on reducing migraine days. This narrow focus may not capture all that is important to people with migraine. Inconsistency in outcome selection across trials limits the potential for data pooling and evidence synthesis. In response, we describe the development of core outcome set for migraine (COSMIG).

Design: A two-stage approach sought to achieve international, multi-stakeholder consensus on both the core domain set (CDS) and core measurement set (CMS). Following construction of a comprehensive list of outcomes, expert panellists (patients, healthcare professionals and researchers) completed a three-round electronic-Delphi study to support a reduction and prioritisation of core domains and outcomes. Participants in a consensus meeting finalised the core domains and methods of assessment. All stages were overseen by an international core team, including patient research partners.

Results: There was good representation of patients (episodic (n=34) and chronic migraine (n=42)) and healthcare professionals (n=33) with high response and retention rates. The initial list of domains and outcomes was reduced from >50 to seven core domains for consideration in the consensus meeting, during which a two-domain core outcome set was agreed.

Conclusion: International and multi-stakeholder consensus emerged to describe a two-domain core outcome set for reporting research on preventive interventions for chronic and episodic migraine: migraine-specific pain and migraine-specific quality of life. Intensity of migraine-pain assessed with an 11-point numerical rating scale and the frequency as the number of headache/migraine days over a specified time-period. Migraine-specific quality of life assessed using the Migraine Functional Impact Questionnaire.

**Strengths and limitations of this study:**

- The research process and validity of results are strengthened by the co-collaboration with patient research partners throughout all stages of the research.
- A bespoke grading system to support the prioritisation of outcome domains between stakeholder groups (expert panels) is described.
- International, multi-stakeholder participation – patients, researchers, and a range of health professionals - in the on-line Delphi survey.
- Expert panel representation in the Delphi survey was largely from Europe and North America.
- The majority of participants in the face-to-face consensus meeting were from the UK.

## BACKGROUND

International guidelines for the conduct of preventive studies for both episodic and chronic migraine specify that the primary outcome should be focussed on migraine days, or for chronic migraine on moderate to severe headache days<sup>1</sup>. Reviews of clinical trials of populations with chronic migraine and episodic migraine have identified substantial inconsistencies in outcomes reporting alongside often poorly defined outcomes<sup>2,3</sup>. An important impact of these inconsistencies is to limit the potential for robust meta-analyses<sup>4,5</sup>. For example, a 2015 meta-analysis of drugs for the prophylaxis of migraine by Jackson et al<sup>6</sup> did not include data from the largest and most robust trial of topiramate for chronic migraine (n=307) that found a mean difference of 1.7 migraine/migrainous days per 28 days after 12 weeks<sup>7</sup>. The reviewers meta-analysed the data from two much smaller (n=32 & n=50), low quality studies, and reported an effect size of 8.4 headache days, the outcome specified for the meta-analyses, after 12 weeks. Data that cannot be interpreted or utilised can result in unacceptable and unethical research waste. There is also potential for selective outcomes reporting and associated reporting bias if consistent outcomes are not pre-specified<sup>8,9</sup>.

Improved consistency, accountability and transparency in outcome reporting can be achieved by using a Core Outcome Set (COS); a small, standardised group of outcomes that should be measured and reported, as a minimum, in all effectiveness trials for a specific health area<sup>10-12</sup>.

Current international guidelines for conduct of prevention studies in episodic or chronic migraine have not developed outcome reporting recommendations in line with current best practice<sup>1,13</sup>. Notably, patient input is markedly absent from these guidelines.

We describe here the development of a multiple-stakeholder, internationally endorsed, consensus-based COS applicable to preventative intervention trials and research studies in adults with episodic or chronic MIGraine (COSMIG).

## Methods

Two key stages in core outcome set development are described (figure 1)<sup>14</sup>:

*Stage 1) Defining the core domain set:* WHAT to measure; i.e., the minimum number of health domains that should be assessed. A domain describes the concept or 'aspect of health or a health condition that needs to be measured to appropriately assess the effects of a health intervention'<sup>14</sup>.

*Stage 2) Recommending the core measurement set:* HOW to measure, i.e., the minimum set of assessment methods that adequately correspond to the core domain set.

1  
2  
3 We prospectively registered COSMIG with the Core Outcomes Measures in Effectiveness Trials  
4 (COMET) initiative [<http://www.comet-initiative.org/studies/details/953>]. Ethical approval was  
5 gained from Warwick Medical School Biomedical and Scientific Research Ethics Committee REGO-  
6 2017-1921.  
7  
8  
9

### 10 Patient and public involvement

11 Following good practice guidance [[https://www.invo.org.uk/posttypresource/before-you-start-](https://www.invo.org.uk/posttypresource/before-you-start-involving-people/)  
12 [involving-people/](https://www.invo.org.uk/posttypresource/before-you-start-involving-people/)];<sup>15</sup> we worked collaboratively with our patient research partners, who all had  
13 experience of chronic or episodic migraine, throughout all stages of the research.  
14  
15  
16  
17  
18

19 The COSMIG core group consisted of clinicians with expertise in headaches and migraine (MM,MU,  
20 BD), including two international members (RL,RJ), research scientists with expertise in clinical trials,  
21 Delphi technique, health measurement and qualitative research (MU,KH,RF,RP,SP,VN,SP,KS) and  
22 patient research partners (GP,BB,LM). Regular meetings were held between all group members to  
23 discuss the methodology for the Delphi study and the subsequent consensus meeting. The group  
24 met specifically between each Delphi round, to discuss results, confirm feedback and format for  
25 subsequent rounds.  
26  
27  
28  
29  
30  
31

### 32 **Stage 1 Core Domain Set**

#### 33 **Stage 1.1: Developing a comprehensive domain list**

34 We first identified potential domains from systematic reviews<sup>2,3</sup> and qualitative research<sup>16</sup>.  
35 Domains were written in plain English as on-line questionnaires: one questionnaire contained  
36 domains for episodic headache, and one for chronic headache. Questionnaires were piloted with the  
37 core team and researchers naïve to the study (n=12).  
38  
39  
40  
41  
42  
43  
44

#### 45 **Stage 1.2: International modified-Delphi process**

46 Our primary goal for our Delphi study was to refine and prioritise domains. The Delphi process seeks  
47 to establish consensus between a panel of experts following a structured process of questionnaire  
48 completion and systematic feedback.<sup>17,18</sup> The panels are not intended to be representative of all  
49 headache specialists or people with migraine (as is the case when sampling from a definable  
50 population). We defined two expert panels external to the core research team: one comprised of  
51 expert patients with a target of up to 50 with chronic migraine (CM) and 50 with episodic migraine  
52 (EM); and a second panel (also up to 50) comprised of healthcare professionals and researchers, who  
53 were representative of their professions and well-placed to implement study findings<sup>19</sup>.  
54  
55  
56  
57  
58  
59  
60

1  
2  
3 Professionals included neurologists, nurse specialists, general practitioners, allied health  
4 professionals, researchers, and measurement experts. We sought consensus between experts on the  
5 core domain set.  
6  
7

8  
9 **Patients:** We asked 13 national/international organisations to advertise the study on their  
10 social media platforms. Interested participants ( $\geq 18$ -years old) contacted the research team. We  
11 asked participants to self-diagnose/classify their migraines as episodic or chronic migraine. Patient  
12 participants completed episodic *or* chronic migraine questionnaires depending on their self-  
13 diagnosis.  
14  
15

16  
17 **Professionals:** We invited national and international healthcare professionals (neurologists,  
18 GPs, nurses, psychologists, pharmacists, allied health professionals) and researchers (trialists,  
19 reviewers, health economists, measurement experts) involved in headache research identified  
20 through professional societies and from published research to participate. They were asked to  
21 complete *both* questionnaires.  
22  
23

24 The Delphi process had three sequential rounds with participants completing each prior round  
25 eligible to complete the next. The Delphi study administration and hosting of the on-line  
26 questionnaires was managed by Clinvivo Ltd.  
27  
28  
29

30  
31  
32 Round 1 Participants rated the relative importance of each domain for inclusion in future research  
33 studies of chronic or episodic headache using a nine point numerical rating scale (range 1 to 3 'Not  
34 at all important', 4 to 6 'Uncertain', and 7 to 9 'Very important'). Participants could elaborate on  
35 their decisions by providing additional qualitative comment and/or provide additional domains for  
36 consideration and rating in subsequent rounds. Informed by an approach described by Orbai et al.  
37 (2017)<sup>20</sup>, we devised a bespoke grading system to illustrate where consensus was achieved and to  
38 indicate more easily where participants in each panel disagreed in their judgement (Appendix Table  
39 1). An *a priori* decision rule determined that only those outcome domains judged most favourably by  
40 one or both panels (patients and professionals) would be included in round two. That is, domains  
41 were included in round 2 if in both panels the median rating was 9 ('A\*\*\*'), or if in both panels  $\geq 70\%$   
42 rated a domain  $\geq 7$  ('A\*'). If in both panels the median domain rating was  $\geq 7$  ('A'), or the median  
43 rating for a domain was  $\geq 7$  in just one panel ('B'), the domain could be included in round 2 if either  
44 panel achieved a median score of 9 or qualitative evidence supported further consideration.  
45  
46  
47  
48  
49  
50  
51  
52  
53

54  
55 Round 2 In round two we focused more specifically on migraine-specific (e.g. nausea and  
56 photophobia), rather than headache-specific, domains. Responses to round one were summarised  
57 and anonymous feedback provided. Participants all received their own score for each domain, and  
58 the group median scores. Further prioritisation was achieved by inviting participants to 'spend  
59  
60



1  
2  
3 points' (up to a maximum of 70) to illustrate how strongly they felt that a domain should be  
4 prioritised for inclusion in the core domain set; a maximum of 10 points could be allocated to any  
5 one outcome domain (11-point scale, 0 'Not a priority' to 10 'Absolute priority'). To ensure that sub-  
6 panel differences were considered, and any discrepancies highlighted, the results from both panels  
7 were considered both separately and combined: the top 10 and top 50% of prioritised domains were  
8 discussed between COSMIG core team members, informing the maintenance of, or, where the  
9 concepts of health were similar, grouping of domains into a single 'meaningful' domain.

10  
11 Round 3 Responses to round two were summarised, highlighting the top 50% of prioritised domains  
12 and between-panel discrepancies. For those domains prioritised highly by just one panel (top 50%),  
13 participants were asked to reconsider if they should be included in the priority listing. If more than  
14 70% of respondents selected 'yes', the domain was included. Finally, participants were asked to  
15 indicate by means of a dichotomous response if they: a) were happy with the grouping of prioritised  
16 domains; b) were happy with the proposed 'meaningful' domain and definition; and c) had  
17 additional comments. The frequency distribution of responses was calculated. Results from both  
18 sub-panels were again considered separately and combined.

## 31 **Stage 2: Core Measurement Set**

### 33 **International expert panel face-to-face meeting**

34 The purpose of the one-day meeting was to discuss the core domain set developed in our modified  
35 Delphi study, agree the core measurement set, and recommend the core outcome set. Importantly,  
36 participants were to consider that whilst a domain may be considered important, if an acceptable  
37 approach to measurement is not available, it is not appropriate to include the domain in a core  
38 outcome set.

39 We invited professionals from Europe and patients from the UK who had taken part in our Delphi  
40 study. Participants received an information pack with meeting objectives and domain/measurement  
41 information ahead of the meeting. Where existing consensus for potential measures was not  
42 available, the COSMIG core team reviewed key data sources for guidance and evidence of  
43 measurement quality, acceptability and feasibility for use in preventive studies of episodic or chronic  
44 migraine:<sup>21</sup>

- 45 • Migraine / headache:
  - 46 ○ Review of patient-reported outcome measures (PROMS)<sup>2</sup>
  - 47 ○ International Headache Society guidelines <sup>1, 13, 22</sup>

- National Institute for Neurological Disorders Common Data Elements – Headache (preventative treatment)<sup>23</sup>
- Chronic Pain and core outcome set development
  - Initiative on Methods, Measurement and Pain Assessment in Clinical Trials<sup>24-26</sup>
  - Outcome Measures in Rheumatology and Clinical Trials group<sup>27</sup>

The meeting started with an overview of the results of the Delphi process, prioritised domains, and the evidence-base underpinning potential methods of assessment. Participants were asked to consider three options when determining domain ‘placement’ within the final core outcome set<sup>20</sup>:

- i) *Core ‘inner’ circle*: domain is unambiguous with an acceptable method of assessment;
- ii) *Middle circle*: domain is important, but not feasible for all preventative trials and research studies;
- iii) *Outer circle*: domain is important but requires further study (research agenda) – e.g. lacks conceptual clarity or method of assessment.

Semi-structured, small-group discussions with a mix of patients, healthcare professionals/ researchers and members of the core research team (including patient partners) ensued, covering each prioritised domain. Two facilitators each supported two rounds of discussion per domain. Outcome domains and methods of assessment were reviewed in terms of importance, quality, acceptability, and feasibility. Facilitators supported participant contribution and shared findings between groups to stimulate discussion. Following each small-group discussion, participants, with the exception of the core research team, were asked to indicate anonymously (paper-based questionnaire) their preference for domain inclusion (yes/no/don’t know) and method of assessment (selecting one option from a short-list) in the core outcome set; an *a priori* definition of agreement required  $\geq 70\%$  of panellists to agree.

Next, small group discussions and results were presented to the whole group. Where there was agreement, no further discussion was required. Subsequent discussion focused on where further refinement was required. Finally, participants voted electronically to confirm domain placement in the COS (inner/middle/outer/out) and method of assessment. Proceedings were captured in the form of detailed written records and the outcomes of voting.

## Results

## Stage 1 Core Domain Set

### Stage 1.1: Developing a comprehensive domain list

A total of 57 (episodic) and 58 (chronic) domains were included in the questionnaire, grouped across four areas: symptoms (17), life impact (27 episodic / 28 chronic), treatment effectiveness/ financial impact (10) and complications (2). Piloting informed minor language modifications. Fifty-seven of the domains of interest were included for both episodic and chronic migraine.

### Stage 1.2: International modified-Delphi process

#### Round one

**Sub-panel 1** (patients) Two organisations advertised the study (Migraine Association, Ireland; National Migraine Centre, UK). Almost 80% (76/96) of patients who expressed an interest in taking part in the study completed the first questionnaire (42/53 CM (79%); 34/43 EM (79%)). Most were female (CM 40/53 (73%); EM 29/43 (66%)) and aged between 36-45 (CM 41%) and 56-65 years (EM 32%) (range 18 to >66 years). Most were from the UK (57%), followed by the US (19%), Ireland (14%), Canada (2%), and the rest of Europe (Denmark (2%), France (5%)).

**Sub-panel 2** (professionals) From a total of 198 international healthcare professionals/researchers invited to participate, 64 agreed. Nearly half (31/64 (48%)) joined the panel to complete the episodic migraine questionnaire; slightly more (33/64 (52%)) completed the chronic migraine questionnaires. Most were from the UK 14/33 (42%), with participants from the US 5/33 (15%), Europe (Belgium 1/33 (3%), Germany 2/33 (6%), Italy 1/33 (3%), Netherlands 1/33 (3%), Portugal 1/33 (3%), Serbia 1/33 (3%), Spain 2/33 (6%)) and Turkey 1/33 (3%), the Russian Federation 1/33 (3%), South Africa 1/33 (3%) and Thailand 1/33 (3%). Professionals included neurologists, nurse specialists, general practitioner, allied health professionals, researchers, and measurement experts (Appendix Table 2).

In total, 75 (64%) and 65 (61%) panellists completed round 1 chronic and episodic migraine questionnaires, respectively.

Most domains were rated as 'important', with few between panel discrepancies. Implementation of the *a priori* decision rule (Appendix Table 1) supported a 50% reduction in domains, with the prioritisation of 18/57 (episodic) and 24/58 (chronic) domains (Table 1).

Table 1. Delphi Round 1 shortlisted domains by voting prioritisation and agreement between panels

| Domain | EPISODIC MIGRAINE                               | CHRONIC MIGRAINE |
|--------|-------------------------------------------------|------------------|
|        | Evidence supporting inclusion in Round 2 Delphi |                  |

| <b>Section 1: Life impact – symptoms associated with headache / migraine</b>                                                                                                                                                                                               | Voting prioritisation | Qualitative feedback | Voting prioritisation | Qualitative feedback |
|----------------------------------------------------------------------------------------------------------------------------------------------------------------------------------------------------------------------------------------------------------------------------|-----------------------|----------------------|-----------------------|----------------------|
| <b>Cognitive function</b> – difficulty concentrating, ability to ‘think clearly’ or to remember things                                                                                                                                                                     | (A)                   | Yes                  | A*                    |                      |
| <b>Increased sensitivities</b> – to light, sound, smell, touch                                                                                                                                                                                                             | A*                    |                      | A*                    |                      |
| <b>Pain associated with headache</b> – experience an unpleasant physical sensation that aches or hurts                                                                                                                                                                     | A**                   |                      | A*                    |                      |
| <b>Duration of pain</b> associated with a headache                                                                                                                                                                                                                         | A**                   |                      | A*                    |                      |
| <b>Frequency of pain</b> associated with a headache                                                                                                                                                                                                                        | A**                   |                      | A*                    |                      |
| <b>Severity / intensity of pain</b> associated with a headache                                                                                                                                                                                                             | A**                   |                      | A*                    |                      |
| <b>Physical fatigue</b> – experiencing physical fatigue, tiredness, lacking in energy, feeling physically exhausted                                                                                                                                                        | (A)                   | Yes                  | A*                    |                      |
| <b>Sleep quality</b> – being able to have a restful sleep                                                                                                                                                                                                                  | (A)                   |                      | A*                    |                      |
| <b>Vomiting</b> and/or feelings of nausea                                                                                                                                                                                                                                  | A*                    |                      | (A)                   |                      |
| <b>Anxiety</b> – concerned, worried, fearful or anxious                                                                                                                                                                                                                    | (A)                   | Yes                  | (A)                   | Yes                  |
| <b>Depressive mood</b> – feeling sad, feeling down, feeling sorry for oneself or feeling depressed                                                                                                                                                                         | (A)                   | Yes                  | (A)                   | No                   |
|                                                                                                                                                                                                                                                                            |                       |                      |                       |                      |
| <b>Section 2: Life impact – functioning, activities and general wellbeing</b>                                                                                                                                                                                              |                       |                      |                       |                      |
| <b>Activities of daily life</b>                                                                                                                                                                                                                                            |                       |                      |                       |                      |
| Being able to carry out <b>usual tasks or daily activities</b> inside or outside the home (not related to paid employment) <b>that support an independent lifestyle</b> – such as tidying one’s home, walking short distances, managing finance, driving, using technology | (A)                   |                      | A*                    |                      |
| Needing to rest or lie down <b>because of</b> a headache                                                                                                                                                                                                                   | (A)                   |                      | A*                    |                      |
| <b>Emotional wellbeing</b>                                                                                                                                                                                                                                                 |                       |                      |                       |                      |
| <b>Feelings of isolation</b> – feeling isolated, reduced social interactions                                                                                                                                                                                               | (B)                   | Yes                  | (A)                   | Yes                  |
| <b>Self-worth</b> – feeling like a burden to others; can include feeling valued or helpless, accepted or rejected; feelings of self-esteem                                                                                                                                 | (B)                   | Yes                  | (A)                   | Yes                  |
| <b>Stress</b> – feelings of distress, frustration or irritation                                                                                                                                                                                                            | A*                    |                      | (A)                   | Yes                  |
| <b>Work/Education</b>                                                                                                                                                                                                                                                      |                       |                      |                       |                      |
| Being able to carry out <b>activities related to work</b> (paid or unpaid) / <b>study</b> to an acceptable or usual standard                                                                                                                                               | A*                    |                      | A**                   |                      |
| Needing to take <b>time-off work</b> (paid or unpaid) / <b>study</b>                                                                                                                                                                                                       | A*                    |                      | A*                    |                      |
| <b>Social life</b>                                                                                                                                                                                                                                                         |                       |                      |                       |                      |
| <b>Social life</b> – relationships with colleagues or peers                                                                                                                                                                                                                |                       |                      | A*                    |                      |
| <b>Family roles</b> – being able to <b>provide</b> usual care and support for family and close friends                                                                                                                                                                     | (A)                   | Yes                  | (A)                   | Yes                  |
| <b>Participation in social or leisure activities</b> – ability to participate in social or leisure activities                                                                                                                                                              | (A)                   | Yes                  | (A)                   | Yes                  |
| <b>Overall health</b> – an individual’s general health status; the ability to live a ‘normal’ life                                                                                                                                                                         | A*                    |                      | A*                    |                      |
| <b>Self-management</b> – ability to effectively decrease/ minimise / control the impact of migraine on oneself (e.g. pharmacology, diet, lifestyle choices)                                                                                                                | A*                    |                      | A*                    |                      |

|                                                                                                                                                     |           |     |           |     |
|-----------------------------------------------------------------------------------------------------------------------------------------------------|-----------|-----|-----------|-----|
| <b>Unpredictability of a migraine</b> – uncertainty of being symptom-free or able to engage in activities                                           | A*        | No  | (A)       | Yes |
| <b>Trigger factors</b> – ability to avoid / manage migraine trigger factors                                                                         | (B)       | Yes |           | No  |
| <b>Section 3: Treatment effectiveness and financial impact</b>                                                                                      |           |     |           |     |
| <b>Satisfaction</b> with treatment                                                                                                                  | A*        |     | A*        |     |
| <b>Confidence</b> in treatment                                                                                                                      | A*        |     | A*        |     |
| <b>Consistency</b> of treatment effect                                                                                                              | A*        |     | A*        |     |
| Medication use – the type (potency) and dose (how much) medication <b>taken when experiencing</b> a migraine or headache                            | A*        |     | A*        |     |
| Medication use – the type (potency) and dose (how much) medication <b>taken to prevent</b> a migraine or headache                                   | A*        |     | A*        |     |
| <b>Financial impact</b> – the economic cost associated with migraine treatment (to the individual (out of pocket expenses)) and healthcare systems) | (A)       |     | A*        |     |
| <b>Use of healthcare resources</b> in response to migraine                                                                                          | (A)       |     | A*        |     |
| <b>Section 4: Complications (Adverse Events)</b>                                                                                                    |           |     |           |     |
| <b>Treatment side effects</b> – experiencing undesirable secondary effects from taking medications for migraine                                     | A*        |     | A**       |     |
| <b>Mortality</b> (death)                                                                                                                            | (A)       |     | A**       |     |
| Included in Round 2 due to importance scores (A** or A*)                                                                                            | 18        |     | 24        |     |
| Included in Round 2 due to qualitative feedback                                                                                                     | 9         |     | 7         |     |
| New outcomes added due to qualitative feedback                                                                                                      | 0         |     | 0         |     |
| <b>TOTAL number of outcomes for inclusion in Round 2</b>                                                                                            | <b>27</b> |     | <b>31</b> |     |

Footnote: Each outcome was assigned to one of six categories reflecting levels of agreement: outcomes classified A\*\* and A\* would be included in round 2.

- A\*\* if in both sub-panels the median rating is 9
- A\* if in both sub-panels  $\geq 70\%$  rate an outcome  $\geq 7$
- (A) if in both sub-panels the median outcome rating is  $\geq 7$
- (B) if the median rating for an outcome is  $\geq 7$  in only one sub-panel

Qualitative feedback informed further consideration of 10 domains (9 episodic, 7 chronic) not achieving the proposed benchmark. No 'new' domains were proposed.

### Round two

Round two questionnaires contained 27 (episodic) and 31 (chronic) domains (Table 1). Round two was completed by 23/33 (70%) and 29/31 (93%) health professionals and 33/42 (79%) and 25/34

(74%) patients for chronic and episodic migraine, respectively (totalling 54 episodic (83%) and 56 chronic (75%) migraine questionnaires completed).

When prioritised according to the top 10 and top 50% of domains, several overriding ‘meaningful’ domains could be described (Tables 2 a-b); six of which were common to both episodic and chronic migraine: pain, usual activities, cognition, adverse events, overall health, associated symptoms. Respondents to the episodic migraine questionnaire also prioritised self-management, whilst medication use was prioritised by chronic migraine respondents.

Table 2a. Delphi Round 2. Results of domain prioritisation for Episodic Migraine (combined panels n=27)\*\*

| Rank* | Proposed ‘merged’ domain and definition                                                                                                                                                                                                                                                           | Top 10/27 prioritised domains                                                                                                        | Top 50% of prioritised domains (rank 1 to 13/27 inclusive)                                                                       | Lower 50% of prioritised domains (rank 14 to 27 inclusive)                                                                    |
|-------|---------------------------------------------------------------------------------------------------------------------------------------------------------------------------------------------------------------------------------------------------------------------------------------------------|--------------------------------------------------------------------------------------------------------------------------------------|----------------------------------------------------------------------------------------------------------------------------------|-------------------------------------------------------------------------------------------------------------------------------|
| 1     | <b>Pain</b><br>- <i>Experience of an unpleasant sensation that aches or hurts in the head; the frequency, severity and duration of this pain is important</i>                                                                                                                                     | Pain associated with Migraine – experience of an unpleasant sensation that aches or hurts (1/27)                                     |                                                                                                                                  |                                                                                                                               |
|       |                                                                                                                                                                                                                                                                                                   | Frequency of pain associated with a migraine (2/27)                                                                                  |                                                                                                                                  |                                                                                                                               |
|       |                                                                                                                                                                                                                                                                                                   | Severity or intensity of pain associated with a migraine (3/27)                                                                      |                                                                                                                                  |                                                                                                                               |
|       |                                                                                                                                                                                                                                                                                                   | Duration of pain associated with a migraine (4/27)                                                                                   |                                                                                                                                  |                                                                                                                               |
| 2     | <b>Usual activities</b><br>- <i>Being able to carry out usual activities (including paid or unpaid work, study, domestic chores, care or support for family or close friends) to an acceptable or usual standard</i><br><br>- <i>Being able to participate in, or commit to, usual activities</i> | Being able to carry out <b>activities related to work</b> (paid or unpaid) <b>or study</b> to an acceptable or usual standard (5/27) |                                                                                                                                  |                                                                                                                               |
|       |                                                                                                                                                                                                                                                                                                   |                                                                                                                                      | Family roles – able to provide usual care or support for family or close friends, including ability to commit activities (11/27) |                                                                                                                               |
|       |                                                                                                                                                                                                                                                                                                   |                                                                                                                                      | Needing to take time-off work (paid or unpaid) or study (13/27)                                                                  |                                                                                                                               |
|       |                                                                                                                                                                                                                                                                                                   |                                                                                                                                      |                                                                                                                                  | Participation in social or leisure activities – ability to participate in, or commit to, social or leisure activities (22/27) |
| 3     | <b>Cognition</b><br>- <i>Difficulty concentrating, ability to ‘think clearly’, or to remember things</i>                                                                                                                                                                                          | Cognitive function – difficulty concentrating, ability to think ‘clearly’ or to remember things (6/27)                               |                                                                                                                                  |                                                                                                                               |
| 4     | <b>Adverse events</b>                                                                                                                                                                                                                                                                             | Treatment side-effects – experiencing undesired secondary effects from taking medications for migraine (7/27)                        |                                                                                                                                  |                                                                                                                               |

|   |                            |                                                                                   |                                                                                                                                                                    |                                                                                                                                                                              |
|---|----------------------------|-----------------------------------------------------------------------------------|--------------------------------------------------------------------------------------------------------------------------------------------------------------------|------------------------------------------------------------------------------------------------------------------------------------------------------------------------------|
| 5 | <b>Overall health</b>      | An individual's general health status; the ability to 'live a normal life' (8/27) |                                                                                                                                                                    |                                                                                                                                                                              |
| 6 | <b>Self-management</b>     | Trigger factors – the ability to avoid / manage migraine trigger factors (9/27)   |                                                                                                                                                                    |                                                                                                                                                                              |
|   |                            |                                                                                   | Self-management – ability to effectively decrease / minimise/ control the impact of migraine on oneself (e.g. pharmaceutical, diet, lifestyle choices etc) (11/27) |                                                                                                                                                                              |
|   |                            |                                                                                   |                                                                                                                                                                    | Unpredictability of a migraine – uncertainty of being symptom free or able to engage in activities (17/27)<br><b>** prioritised in top 10 (10/27) by patients</b>            |
| 7 | <b>Associated symptoms</b> | Increased sensitivities – to light, sound, smell or touch (10/27)                 |                                                                                                                                                                    |                                                                                                                                                                              |
|   |                            |                                                                                   |                                                                                                                                                                    | Vomiting and/ or feelings of nausea (15/27)<br><b>** prioritised in top 10 (8/27) by HCPs</b>                                                                                |
|   |                            |                                                                                   |                                                                                                                                                                    | Physical fatigue – experiencing physical fatigue, tiredness, lacking in energy, feeling physically exhausted (18/27)<br><b>** prioritised in top 50% (11/27) by patients</b> |
| 8 | Medication use             |                                                                                   |                                                                                                                                                                    | Satisfaction with treatment (14/27)<br><b>** prioritised in top 10 (9/27) by HCPs</b>                                                                                        |
|   |                            |                                                                                   |                                                                                                                                                                    | The type (potency) and dose (how much) of a medication <b>taken when experiencing</b> a migraine (16/27)<br><b>** prioritised in top 50% (11/27) by HCPs</b>                 |
|   |                            |                                                                                   |                                                                                                                                                                    | The type (potency) and dose (how much) of a medication <b>taken to prevent</b> a migraine (21/27)                                                                            |
|   |                            |                                                                                   |                                                                                                                                                                    | Consistency in treatment (23/27)                                                                                                                                             |
|   |                            |                                                                                   |                                                                                                                                                                    | Confidence in treatment (25/27)                                                                                                                                              |
| 9 | Emotional well-being       |                                                                                   |                                                                                                                                                                    | Anxiety (19/27)                                                                                                                                                              |
|   |                            |                                                                                   |                                                                                                                                                                    | Depression (19/27)<br><b>** prioritised in top 50% (13/27) by patients</b>                                                                                                   |

|  |  |  |  |                    |
|--|--|--|--|--------------------|
|  |  |  |  |                    |
|  |  |  |  | Stress (24/27)     |
|  |  |  |  | Self-worth (24/27) |
|  |  |  |  | Isolation (27/27)  |

Footnote:

\*Top 7 grouped domains – informed by top 10 and top 50% of prioritised domains (13/27).

\*\* 6 domains prioritised differently between the two panels; considered further in Round 3.

Table 2b. Delphi Round 2. Results of domain prioritisation for Chronic Migraine (combined panels n=31)\*\*

| Rank* | Domain and definition                                                                                                                                                                                                                                                                         | Top 10/31 prioritised domains                                                                                                                                                                                                                                                                               | Top 50% of prioritised domains (rank 1 to 15/31 inclusive)      | Lower 50% of prioritised domains (rank 16 to 31 inclusive)                                                                       |
|-------|-----------------------------------------------------------------------------------------------------------------------------------------------------------------------------------------------------------------------------------------------------------------------------------------------|-------------------------------------------------------------------------------------------------------------------------------------------------------------------------------------------------------------------------------------------------------------------------------------------------------------|-----------------------------------------------------------------|----------------------------------------------------------------------------------------------------------------------------------|
| 1     | <b>Pain</b><br>- <i>Experience of an unpleasant sensation that aches or hurts in the head; the frequency, severity and duration of this pain is important</i>                                                                                                                                 | Severity or intensity of pain associated with a migraine (1/31)                                                                                                                                                                                                                                             |                                                                 |                                                                                                                                  |
|       |                                                                                                                                                                                                                                                                                               | Pain associated with Migraine – experience of an unpleasant sensation that aches or hurts (2/31)                                                                                                                                                                                                            |                                                                 |                                                                                                                                  |
|       |                                                                                                                                                                                                                                                                                               | Frequency of pain associated with a migraine (3/31)                                                                                                                                                                                                                                                         |                                                                 |                                                                                                                                  |
|       |                                                                                                                                                                                                                                                                                               | Duration of pain associated with a migraine (4/31)                                                                                                                                                                                                                                                          |                                                                 |                                                                                                                                  |
| 2     | <b>Usual activities</b><br>- <i>Being able to carry out usual activities (including paid or unpaid work, study, domestic chores, care or support for family or close friends) to an acceptable or usual standard</i><br>- <i>Being able to participate in, or commit to, usual activities</i> | Being able to carry out usual tasks or daily activities inside or outside the home (not related to paid employment) that support an independent lifestyle – such as tidying one’s home, walking short distances, managing finance, driving, usual technology (instrumental activities of daily life) (5/31) |                                                                 |                                                                                                                                  |
|       |                                                                                                                                                                                                                                                                                               | Being able to carry out activities related to work (paid or unpaid) or study to an acceptable or usual standard (6/31)                                                                                                                                                                                      |                                                                 |                                                                                                                                  |
|       |                                                                                                                                                                                                                                                                                               |                                                                                                                                                                                                                                                                                                             | Needing to take time-off work (paid or unpaid) or study (11/31) |                                                                                                                                  |
|       |                                                                                                                                                                                                                                                                                               |                                                                                                                                                                                                                                                                                                             |                                                                 | Family roles – able to provide usual care or support for family or close friends, including ability to commit activities (19/31) |
|       |                                                                                                                                                                                                                                                                                               |                                                                                                                                                                                                                                                                                                             |                                                                 | Participation in social or leisure activities – ability to participate in, or commit to, social or leisure activities (22/31)    |
|       |                                                                                                                                                                                                                                                                                               |                                                                                                                                                                                                                                                                                                             |                                                                 |                                                                                                                                  |
| 3     | <b>Cognition</b><br>- <i>Difficulty concentrating, ability to ‘think clearly’, or to remember things</i>                                                                                                                                                                                      | Cognitive function – difficulty concentrating, ability to think ‘clearly’ or to remember things (7/27)                                                                                                                                                                                                      |                                                                 |                                                                                                                                  |
| 4     | <b>Adverse events</b>                                                                                                                                                                                                                                                                         | Treatment side-effects – experiencing undesired                                                                                                                                                                                                                                                             |                                                                 |                                                                                                                                  |



|   |                             |                                                                                                                      |                                                                                    |                                                                                                                                             |
|---|-----------------------------|----------------------------------------------------------------------------------------------------------------------|------------------------------------------------------------------------------------|---------------------------------------------------------------------------------------------------------------------------------------------|
|   |                             | secondary effects from taking medications for migraine (8/31)                                                        |                                                                                    |                                                                                                                                             |
|   |                             |                                                                                                                      |                                                                                    | Mortality (death) (26/31)<br><b>** prioritised in top 50% (15/31) by HCPs</b>                                                               |
| 5 | <b>Associated symptoms</b>  | Increased sensitivities – to light, sound, smell or touch (9/31)                                                     |                                                                                    |                                                                                                                                             |
|   |                             | Physical fatigue – experiencing physical fatigue, tiredness, lacking in energy, feeling physically exhausted (10/31) |                                                                                    |                                                                                                                                             |
|   |                             |                                                                                                                      | Sleep quality – being able to have a restful sleep (14/31)                         |                                                                                                                                             |
|   |                             |                                                                                                                      | Needing to rest or lie down because of a headache (15/31)                          |                                                                                                                                             |
| 6 | <b>Medication use</b>       |                                                                                                                      | Satisfaction with treatment (12/31)                                                |                                                                                                                                             |
|   |                             |                                                                                                                      |                                                                                    | The type (potency) and dose (how much) of a medication taken to prevent a migraine (21/31)                                                  |
|   |                             |                                                                                                                      |                                                                                    | Consistency in treatment effect (23/31)                                                                                                     |
|   |                             |                                                                                                                      |                                                                                    | The type (potency) and dose (how much) of a medication taken during a migraine (24/31)                                                      |
|   |                             |                                                                                                                      |                                                                                    | Confidence in treatment (28/31)                                                                                                             |
| 7 | <b>Overall health</b>       |                                                                                                                      | An individual's general health status; the ability to 'live a normal life' (13/31) |                                                                                                                                             |
| 8 | <b>Emotional well-being</b> |                                                                                                                      |                                                                                    | Stress – feelings of distress, frustration or irritation (16/31)<br><b>** prioritised in top 10 (10/31) by HCPs</b>                         |
|   |                             |                                                                                                                      |                                                                                    | Anxiety – concerned, worried, fearful or anxious (20/31)                                                                                    |
|   |                             |                                                                                                                      |                                                                                    | Self-worth – feeling like a burden to others; can include feeling valued or helpless; accepted or rejected; feelings of self-esteem (28/31) |
|   |                             |                                                                                                                      |                                                                                    | Feelings of isolation – feeling isolated; reduced social interactions (29/31)                                                               |
|   |                             |                                                                                                                      |                                                                                    | Social role – relationship with work colleagues or peers (31/31)                                                                            |
| 9 | <b>Self-management</b>      |                                                                                                                      |                                                                                    | Self-management – ability to effectively decrease / minimise/ control the impact of migraine on oneself (e.g.                               |

|    |                  |  |  |                                                                                                                                                                    |
|----|------------------|--|--|--------------------------------------------------------------------------------------------------------------------------------------------------------------------|
|    |                  |  |  | pharmaceutical, diet, lifestyle choices etc) (17/31)                                                                                                               |
|    |                  |  |  | Unpredictability of a migraine – uncertainty of being symptom free or able to engage in activities (18/31)<br><b>** prioritised in top 50% (14/31) by patients</b> |
| 10 | Financial impact |  |  | Economic cost associated with treatment for headache (to the individual (out-of-pocket expenses) and healthcare system) (25/31)                                    |
|    |                  |  |  | Use of healthcare resources in response to headache (30/31)                                                                                                        |

## Footnote:

\* Top 5 grouped domains – informed by top 10 prioritised domains. Top 7 grouped domains – informed by top 13 and top 50% of prioritised domains (15/31).

\*\* 3 domains prioritised differently between the two panels; considered further in Round 3.

Sub-panel discrepancies for both episodic and chronic migraine included patients' prioritisation of overall health, physical fatigue, unpredictability, and self-management. Patients with episodic migraine also prioritised emotional wellbeing. Although awarded fewer points, people with chronic migraine prioritised the importance of social role and emotional wellbeing. In contrast, healthcare professionals prioritised treatment satisfaction, treatment side-effects and vomiting/ nausea for episodic migraine, and mortality and stress for chronic migraine.

Round three

Round three was completed by 23/23 (100%) and 21/29 (72%) health professionals, and 29/33 (88%) and 23/25 (92%) patients for chronic and episodic migraine, respectively (totalling 52/56 (93%) for chronic migraine and 44/54 EM (81%) for episodic migraine. Six and three domain discrepancies (top 10 or top 50% for one sub-panel only) were considered for episodic migraine (treatment satisfaction; vomiting/ feelings of nausea; medication taken during a migraine; unpredictability; physical fatigue; depressive mood) and chronic migraine (stress; mortality; unpredictability), respectively (Appendix Table 3).

The seven domains for episodic migraine were retained (>76% across sub-panels; >84% combined) (Table 3) and a new domain 'Treatment Satisfaction' proposed (>70% healthcare professionals; 68% combined) (Appendix Table 3). Voting on sub-panel discrepancies further supported the inclusion of vomiting/feelings of nausea, physical fatigue, and depressive mood within the developing core

domain set for episodic migraine (Appendix Table 3). Qualitative feedback in the questionnaire supported a more positive re-phrasing of the concept of self-management.

Table 3. Delphi Round 3: results of voting for domains for episodic and chronic migraine

| Proposed CORE DOMAINS for EM and CM<br>(For voting in Round 3)                                                                                                                                                                                                                                       |                                                                                                                                                                                                                                                                                                                                                                                                                                                                              | EPISODIC MIGRAINE<br>Voting |                   |                | CHRONIC MIGRAINE<br>Voting |                   |                |                    |
|------------------------------------------------------------------------------------------------------------------------------------------------------------------------------------------------------------------------------------------------------------------------------------------------------|------------------------------------------------------------------------------------------------------------------------------------------------------------------------------------------------------------------------------------------------------------------------------------------------------------------------------------------------------------------------------------------------------------------------------------------------------------------------------|-----------------------------|-------------------|----------------|----------------------------|-------------------|----------------|--------------------|
| Prioritised domains<br>(informed by Round 2)                                                                                                                                                                                                                                                         | Proposed 'Meaningful Domain' and definition<br>(bold text informed by R3 qualitative feedback)                                                                                                                                                                                                                                                                                                                                                                               | Q                           | Patient<br>(n=23) | HCPs<br>(n=21) | Combined<br>(n=44)         | Patient<br>(n=29) | HCPs<br>(n=23) | Combined<br>(n=52) |
| <ul style="list-style-type: none"> <li>Pain associated with migraine – an unpleasant sensation that aches or hurts</li> <li>Frequency of pain associated with migraine</li> <li>Severity or intensity of pain associated with migraine</li> <li>Duration of pain associated with migraine</li> </ul> | <p><b>PAIN</b></p> <ul style="list-style-type: none"> <li>Experience of an unpleasant sensation in the head that aches or hurts and is associated with experiencing a migraine;</li> <li>the components of frequency, severity and duration of pain are all important</li> </ul> <p><i>Qualitative feedback supported the addition of:</i></p> <ul style="list-style-type: none"> <li>unpleasant sensation in the head ... <b>face, neck and/or shoulders ...</b></li> </ul> | a.                          | 100.0%            | 100.0%         | 100.0%                     | 96.6%             | 86.9%          | 92.3%              |
|                                                                                                                                                                                                                                                                                                      |                                                                                                                                                                                                                                                                                                                                                                                                                                                                              | b.                          | 82.6%             | 100.0%         | 90.9%                      | 89.7%             | 95.7%          | 92.3%              |
| <ul style="list-style-type: none"> <li>An individual's health status; the ability to live a 'normal' life</li> </ul>                                                                                                                                                                                 | <p><b>OVERALL HEALTH</b></p> <ul style="list-style-type: none"> <li>An individual's health status; the ability to live a 'normal' life</li> </ul> <p><i>Qualitative feedback challenged the concept or 'normal life' and the lack of clarity re a focus on <b>migraine-specific or general quality of life</b>. To be explored during the consensus meeting.</i></p>                                                                                                         | a.                          | 100.0%            | 90.5%          | 95.5%                      | 96.6%             | 87.0%          | 92.3%              |
|                                                                                                                                                                                                                                                                                                      |                                                                                                                                                                                                                                                                                                                                                                                                                                                                              | b.                          | 87.0%             | 81.0%          | 84.1%                      | 89.7%             | 78.3%          | 84.6%              |
| <ul style="list-style-type: none"> <li>Being able to carry out activities related to work (paid or unpaid) or study to an acceptable or usual standard</li> <li>Family roles-able to provide usual care or support for family or close friends,</li> </ul>                                           | <p><b>USUAL ACTIVITIES</b></p> <ul style="list-style-type: none"> <li>Being able to carry out usual activities (including paid or unpaid work, study, domestic chores, family or leisure activities, care or support for family or close friends) to an acceptable or usual standard</li> <li>Being able to participate in or</li> </ul>                                                                                                                                     | a.                          | 95.7%             | 81.0%          | 88.6%                      | 100.0%            | 95.7%          | 98.1%              |
|                                                                                                                                                                                                                                                                                                      |                                                                                                                                                                                                                                                                                                                                                                                                                                                                              | b.                          | 95.7%             | 76.2%          | 86.4%                      | 89.7%             | 95.7%          | 92.3%              |

|                                                                                                                                                                                                                                                                                                                                                                                                                                                               |                                                                                                                                                                                                                                                                                                                                                                                                                                                                                                                                                   |                     |                            |                            |                            |                           |                           |                           |
|---------------------------------------------------------------------------------------------------------------------------------------------------------------------------------------------------------------------------------------------------------------------------------------------------------------------------------------------------------------------------------------------------------------------------------------------------------------|---------------------------------------------------------------------------------------------------------------------------------------------------------------------------------------------------------------------------------------------------------------------------------------------------------------------------------------------------------------------------------------------------------------------------------------------------------------------------------------------------------------------------------------------------|---------------------|----------------------------|----------------------------|----------------------------|---------------------------|---------------------------|---------------------------|
| <p>including to commit to activities (<i>EM only</i>)</p> <ul style="list-style-type: none"> <li>• Need to take time-off work (paid or unpaid) or study</li> <li>• Being able to carry out usual tasks or daily activities inside or outside the home (not related to employment) <i>that support an independent lifestyle</i> – such as tidying one’s home, walking short distances, managing finance, driving, using technology (<i>CM only</i>)</li> </ul> | <p>commit to usual activities</p> <p><i>Qualitative feedback supported the importance of including ‘unpredictability’ in the definition:</i></p> <ul style="list-style-type: none"> <li>- <b>Being able to plan, commit to, or participate in usual activities, including work, usual social or caring roles (due to the unpredictability of a migraine)</b></li> </ul>                                                                                                                                                                           |                     |                            |                            |                            |                           |                           |                           |
| <ul style="list-style-type: none"> <li>• Cognitive function – difficulty concentrating, ability to think ‘clearly’ or to remember things</li> </ul>                                                                                                                                                                                                                                                                                                           | <p><b>COGNITIVE FUNCTION</b></p> <ul style="list-style-type: none"> <li>- Difficulty with concentrating, thinking clearly, or remembering things;</li> </ul> <p><i>Qualitative feedback supported the addition of:</i></p> <ul style="list-style-type: none"> <li>- <b>difficulty with communication (word finding, slow or slurred speech)</b></li> </ul>                                                                                                                                                                                        | <p>a.</p> <p>b.</p> | <p>95.7%</p> <p>91.3%</p>  | <p>100.0%</p> <p>90.5%</p> | <p>97.7%</p> <p>90.9%</p>  | <p>96.6%</p> <p>93.1%</p> | <p>95.7%</p> <p>95.7%</p> | <p>96.1%</p> <p>94.2%</p> |
| <ul style="list-style-type: none"> <li>• Treatment side-effects – experiencing undesired secondary effects from taking medications for migraine</li> </ul>                                                                                                                                                                                                                                                                                                    | <p><b>ADVERSE EFFECTS</b></p> <ul style="list-style-type: none"> <li>- Experiencing undesired secondary effects from taking medications for migraine</li> </ul> <p><i>Qualitative feedback supported adoption of the CTCAE standardised definition of adverse events:</i></p> <ul style="list-style-type: none"> <li>- <b>‘any unfavourable and unintended sign, symptom, or disease temporarily associated with the use of a medical treatment or procedure that may or may not be considered related to the medical treatment or</b></li> </ul> | <p>a.</p> <p>b.</p> | <p>100.0%</p> <p>87.0%</p> | <p>100.0%</p> <p>90.5%</p> | <p>100.0%</p> <p>88.6%</p> | <p>89.7%</p> <p>93.1%</p> | <p>95.7%</p> <p>82.6%</p> | <p>92.3%</p> <p>88.5%</p> |

|                                                                                                                                                                                                                                                                                                                                                                                                             | <i>procedure.'</i><br><i>(CTCAE ref)</i>                                                                                                                                                                                                                                                                                                                                                                                                                                                                                                                                                                                                                                                                                                                                                                                               |    |       |         |       |       |              |              |
|-------------------------------------------------------------------------------------------------------------------------------------------------------------------------------------------------------------------------------------------------------------------------------------------------------------------------------------------------------------------------------------------------------------|----------------------------------------------------------------------------------------------------------------------------------------------------------------------------------------------------------------------------------------------------------------------------------------------------------------------------------------------------------------------------------------------------------------------------------------------------------------------------------------------------------------------------------------------------------------------------------------------------------------------------------------------------------------------------------------------------------------------------------------------------------------------------------------------------------------------------------------|----|-------|---------|-------|-------|--------------|--------------|
|                                                                                                                                                                                                                                                                                                                                                                                                             | <b>ASSOCIATED SYMPTOMS</b>                                                                                                                                                                                                                                                                                                                                                                                                                                                                                                                                                                                                                                                                                                                                                                                                             |    |       |         |       |       |              |              |
| <ul style="list-style-type: none"> <li>Increased sensitivities – to light, sound, smell or touch</li> <li>Physical fatigue – experiencing physical fatigue, tiredness, lacking in energy, feeling physically exhausted (<i>CM only</i>)</li> <li>Sleep quality – being able to have a restful sleep (<i>CM only</i>)</li> <li>Needing to rest or lie down because of a headache (<i>CM only</i>)</li> </ul> | <ul style="list-style-type: none"> <li>Increased sensitivities – to light (<b>photophobia</b>), sound (<b>phonophobia</b>), smell, touch, or movement</li> <li>Physical fatigue – experiencing physical fatigue, tiredness, lacking in energy, feeling physically exhausted (<i>CM only</i>)</li> <li>Sleep quality – being able to have a restful sleep (<i>CM only</i>)</li> <li>Needing to rest or lie down because of a headache (<i>CM only</i>)</li> </ul> <p><i>Qualitative feedback highlighted concern over the omission of the following components from associated symptoms:</i></p> <ul style="list-style-type: none"> <li><i>Visual disturbances.</i></li> <li><i>Depressive mood</i></li> <li><i>Vomiting / feelings of nausea</i></li> </ul> <p><i>All to be explored in consensus meeting (for both EM and CM)</i></p> | a. | 87.0% | 100.00% | 93.2% | 96.6% | 73.9%        | 86.5%        |
|                                                                                                                                                                                                                                                                                                                                                                                                             |                                                                                                                                                                                                                                                                                                                                                                                                                                                                                                                                                                                                                                                                                                                                                                                                                                        | b. | 87.0% | 90.5%   | 88.6% | 93.1% | 73.9%        | 84.6%        |
| <ul style="list-style-type: none"> <li>Satisfaction with treatment</li> </ul>                                                                                                                                                                                                                                                                                                                               | <b>MEDICATION USE</b><br><br><b>Voting: Proposed domain REJECTED (values &lt; 70%)</b><br><br>Qualitative feedback highlighted the importance of a domain that was not just focused on medication use.<br><br><i>NOTE: Voting on sub-group discrepancies (Table R3b) supported the inclusion of 'Treatment Satisfaction' as a domain within the EM domain set. Core group recommendation that 'TREATMENT SATISFACTION' is explored in consensus meeting for both EM and CM</i>                                                                                                                                                                                                                                                                                                                                                         | a. | N/A   | N/A     | N/A   | 79.3% | <b>69.6%</b> | 75.0%        |
|                                                                                                                                                                                                                                                                                                                                                                                                             |                                                                                                                                                                                                                                                                                                                                                                                                                                                                                                                                                                                                                                                                                                                                                                                                                                        | b. |       |         |       | 72.4% | <b>60.9%</b> | <b>67.3%</b> |
|                                                                                                                                                                                                                                                                                                                                                                                                             | <b>SELF-MANAGEMENT</b>                                                                                                                                                                                                                                                                                                                                                                                                                                                                                                                                                                                                                                                                                                                                                                                                                 |    |       |         |       |       |              |              |

|                                                                                                                                                                                                                                                                                                             |                                                                                                                                                                                                                                                                                                                                                                                                                                                                                                                                                                                                                                                                         |                     |                           |                           |                           |            |            |            |
|-------------------------------------------------------------------------------------------------------------------------------------------------------------------------------------------------------------------------------------------------------------------------------------------------------------|-------------------------------------------------------------------------------------------------------------------------------------------------------------------------------------------------------------------------------------------------------------------------------------------------------------------------------------------------------------------------------------------------------------------------------------------------------------------------------------------------------------------------------------------------------------------------------------------------------------------------------------------------------------------------|---------------------|---------------------------|---------------------------|---------------------------|------------|------------|------------|
| <ul style="list-style-type: none"> <li>• Trigger factors – the ability to avoid / manage migraine trigger factors</li> <li>• Self-management – the ability to effectively decrease / minimise / control the impact of migraine on oneself (e.g. by pharmaceutical, diet, lifestyle choices etc.)</li> </ul> | <ul style="list-style-type: none"> <li>- Ability to effectively decrease / minimise / control the impact of migraine on oneself (e.g. by pharmaceutical, diet, lifestyle choices etc.)</li> <li>- Ability to avoid / manage migraine trigger factors</li> </ul> <p><i>Qualitative feedback – proposed a more positive definition:</i></p> <ul style="list-style-type: none"> <li>- <b>Living better with migraine through lifestyle, dietary, pharmaceutical choices and taking an active part in long-term management of migraine with education and support.</b></li> <li>- <b>Enabling patients to become active partners in their migraine treatment</b></li> </ul> | <p>a.</p> <p>b.</p> | <p>95.7%</p> <p>91.3%</p> | <p>85.7%</p> <p>81.0%</p> | <p>90.9%</p> <p>86.4%</p> | <p>N/A</p> | <p>N/A</p> | <p>N/A</p> |
|-------------------------------------------------------------------------------------------------------------------------------------------------------------------------------------------------------------------------------------------------------------------------------------------------------------|-------------------------------------------------------------------------------------------------------------------------------------------------------------------------------------------------------------------------------------------------------------------------------------------------------------------------------------------------------------------------------------------------------------------------------------------------------------------------------------------------------------------------------------------------------------------------------------------------------------------------------------------------------------------------|---------------------|---------------------------|---------------------------|---------------------------|------------|------------|------------|

Footnote:

Participants were invited to vote (Yes/No): a. Are you happy with the grouping of prioritised domains (Yes/No)? ; b. Are you happy with the proposed ‘meaningful’ domain and definition (Yes/No)?

N/A: Not applicable. Panellists did not vote in this domain.

Six of the seven domains for chronic migraine were retained (>73% across sub-panels; >80% combined) (Table 3). ‘Medication Use’ was rejected (<70%), and a redefining as ‘Treatment Satisfaction’ proposed. Qualitative feedback also highlighted the omission of ‘visual disturbances’ from ‘Associated Symptoms’, and the movement of ‘Sleep Quality’ to ‘Usual Activities’.

For both episodic and chronic migraine, qualitative feedback highlighted the importance of communication difficulties within cognitive function; further consideration of vomiting/nausea, fatigue and depressive mood as additional ‘Associated Symptoms’; and unpredictability and ability to uphold usual commitments within ‘Usual Activities’. Further clarification of the concept of ‘Overall

Health' – for example, general or migraine-specific health, was proposed and adoption of a standardised definition of 'adverse events' (Common Terminology Criteria for Adverse Events (CTCAE) <sup>28</sup>.

The process defined seven core domains common to episodic and chronic migraine (Table 3). Additionally, episodic migraine included 'self-management'.

## Stage 2: Core Measurement Set

### International expert panel face-to-face meeting

The one-day meeting took place at Warwick University in December 2018. Seven patients (three with episodic migraine and four with chronic migraine) and seven healthcare professionals/researchers (two doctors, two nurses, one physiotherapist, two measurement experts) participated from two countries (UK, Portugal). Ten core group members, including two patient research partners (GP, BB), attended.

**Pain** – was re-defined as migraine-specific pain and endorsed as an inner core domain for episodic and chronic migraine (>70%) (Table 4; Figure 2). Based on review of existing measures and group discussion voting supported recommendation of the 11-point numerical rating scale (NRS) for assessing pain intensity <sup>29</sup> and number of headache/migraine days per month for pain frequency <sup>1, 22</sup>. Due to the complexities around the concepts of headache and migraine, it was recommended that the specific terminologies should be defined by individual studies.

Table 4. Consensus meeting: results from small and large group discussions and voting.

| Domain      | Small group                                                                                                                                                                                                                                                                                                                                                                                                                                                                                                                                                                                                   | Large group                                                                                                                                                                                                                                                                                                                                                                                                                                                      | Final decision <sup>a</sup>                                                                                                                                                                                                                                                                                                                                                                                                                                      |
|-------------|---------------------------------------------------------------------------------------------------------------------------------------------------------------------------------------------------------------------------------------------------------------------------------------------------------------------------------------------------------------------------------------------------------------------------------------------------------------------------------------------------------------------------------------------------------------------------------------------------------------|------------------------------------------------------------------------------------------------------------------------------------------------------------------------------------------------------------------------------------------------------------------------------------------------------------------------------------------------------------------------------------------------------------------------------------------------------------------|------------------------------------------------------------------------------------------------------------------------------------------------------------------------------------------------------------------------------------------------------------------------------------------------------------------------------------------------------------------------------------------------------------------------------------------------------------------|
| <b>Pain</b> | <p><b>Domain</b></p> <p>Voting supported inclusion of Pain for EM and CM (&gt;70%)</p> <p>Three aspects of Pain included:</p> <ul style="list-style-type: none"> <li>intensity (11/11)</li> <li>frequency (10/11)</li> <li>duration (8/11)</li> </ul> <p>Proposed domain refinement to 'Migraine-specific Pain'</p> <p><b>Measurement</b></p> <p>Voting for individual options did not exceed 70%</p> <p>Preferred assessments:</p> <p>Intensity: 11-point NRS (55%)</p> <p>Frequency: Number of headache/migraine days (64%)</p> <p>Duration: Cumulative hours per 28-days of moderate/severe pain (55%)</p> | <p><b>Domain</b></p> <p>INNER core: Migraine-specific pain (no further voting required)</p> <p><b>Measurement</b></p> <p>Pain intensity: 11-point NRS (80%)</p> <p>Pain frequency: Number of headache/migraine days (&gt;70%)</p> <p>Pain duration: No consensus.</p> <p>Proposed that daily capture (using paper or electronic diary) or retrospective capture using a questionnaire may not be feasible for all trials.</p> <p>Voting: MIDDLE circle (89%)</p> | <p><b>Domain – both EM and CM</b></p> <p>INNER core : Migraine-specific pain</p> <p>Components: intensity and frequency</p> <p><b>Measurement</b></p> <p>Pain intensity – 11-point NRS (anchors 'no pain' and 'pain as bad as you can imagine')</p> <p>Pain frequency</p> <ul style="list-style-type: none"> <li>number of headache / migraine days</li> </ul> <p>Pain Duration: MIDDLE circle: important but not feasible for all trials / research studies</p> |

|                               |                                                                                                                                                                                                                                                                          |                                                                                                                                                                                                                                                                                                                                                                                                  |                                                                                                                                                                                              |
|-------------------------------|--------------------------------------------------------------------------------------------------------------------------------------------------------------------------------------------------------------------------------------------------------------------------|--------------------------------------------------------------------------------------------------------------------------------------------------------------------------------------------------------------------------------------------------------------------------------------------------------------------------------------------------------------------------------------------------|----------------------------------------------------------------------------------------------------------------------------------------------------------------------------------------------|
| <b>Overall Health</b>         | <p><b>Domain</b><br/>Voting supported redefining domain as Migraine-specific Quality of Life (73%)</p> <p><b>Measurement</b><br/>Migraine Functional Impact Questionnaire (72%)</p>                                                                                      | <p><b>Domain</b><br/>INNER core: Migraine-specific Quality of Life (no further voting required)</p> <p><b>Measurement</b><br/>Migraine Functional Impact Questionnaire</p>                                                                                                                                                                                                                       | <p><b>Domain – both EM and CM</b><br/>INNER core: Migraine-specific Quality of Life</p> <p><b>Measurement</b><br/>Migraine Functional Impact Questionnaire</p>                               |
| <b>Adverse Events</b>         | <p><b>Domain</b><br/>Voting supported the rejection of adverse events from the core domain set (82%)</p> <p><b>Measurement</b><br/>N/A</p>                                                                                                                               | <p><b>Domain</b><br/>Recommendations were supported. Should be captured as part of good clinical practice guidance.</p>                                                                                                                                                                                                                                                                          | <p>Not included in the COS for EM or CM</p>                                                                                                                                                  |
| <b>Self-management</b>        | <p><b>Domain</b><br/>No consensus on the inclusion (46%) / exclusion (54%) of self-management. Participants considered it to be important to both EM and CM, but requiring greater conceptualisation before it can be accurately measured</p>                            | <p><b>Domain</b><br/>Group confirmed the importance of self-management for both EM and CM, but agreed that the lack of conceptualisation and method of assessment prevented inclusion in the COS.<br/>Voting: RESEARCH AGENDA (73%)</p>                                                                                                                                                          | <p><b>Domain and measurement – both EM and CM</b><br/>OUTER circle - Research Agenda: important but requiring further study</p>                                                              |
| <b>Cognitive function</b>     | <p><b>Domain</b><br/>Voting supported the rejection of cognitive function as a separate core domain (70%)</p> <p>But participants supported cognitive function as an important concept.</p>                                                                              | <p><b>Domain</b><br/>Recommendations supported. The importance of cognitive function was supported and the potential for it to be captured with migraine-specific quality of life proposed.</p>                                                                                                                                                                                                  | <p>Not included as a separate core domain for EM or CM.</p> <p>Cognitive function is included within the new domain 'Migraine-specific Quality of Life' and will be assessed by the MFIQ</p> |
| <b>Associated symptoms</b>    | <p><b>Domain</b><br/>No consensus on the inclusion (50%) / exclusion (50%) of associated symptoms.</p> <p>Participants discussed the importance of a wide range of associated symptoms – but capture of all would not be feasible in all trials (and hence not core)</p> | <p><b>Domain</b><br/>Participants recognised pain as an important 'associated symptom' and the inclusion of several additional associated symptoms within the new domain 'MQoL' (captured by the MFIQ).</p> <p>Capturing a larger number of associated symptoms, or specific additional symptoms - such as fatigue - should be study specific and not core.<br/>Voting: MIDDLE circle (100%)</p> | <p><b>Domain and measurement – both EM and CM</b><br/>MIDDLE circle: important but not feasible to include in all trials / research studies.</p>                                             |
| <b>Usual activities</b>       | <p><b>Domain</b><br/>Voting supported the inclusion as a component of a new domain 'MQoL' (100%)</p> <p><b>Measurement</b><br/>Usual activities, as a component of MQoL to be assessed with the MFIQ (80%)</p>                                                           | <p><b>Domain</b><br/>Recommendations were supported</p> <p><b>Measurement</b><br/>N/A</p>                                                                                                                                                                                                                                                                                                        | <p>Not included as a separate core domain for EM or CM.</p> <p>Usual activities is included within the new domain 'Migraine-specific Quality of Life' and will be assessed by the MFIQ</p>   |
| <b>Treatment satisfaction</b> | <p><b>Domain</b></p>                                                                                                                                                                                                                                                     | <p><b>Domain</b></p>                                                                                                                                                                                                                                                                                                                                                                             | <p><b>Domain and measurement – both EM and CM</b></p>                                                                                                                                        |



|  |                                                                                                                                           |                                                                                                                                                                                                                      |                                                                       |
|--|-------------------------------------------------------------------------------------------------------------------------------------------|----------------------------------------------------------------------------------------------------------------------------------------------------------------------------------------------------------------------|-----------------------------------------------------------------------|
|  | Considered important – but no consensus on the inclusion (64%) / exclusion(36%) of treatment satisfaction due to need for greater clarity | Group confirmed the importance of treatment satisfaction for both EM and CM, but agreed that the lack of conceptualisation and method of assessment prevented inclusion in the COS<br>Voting: RESEARCH AGENDA (100%) | OUTER circle - Research Agenda: important but requiring further study |
|--|-------------------------------------------------------------------------------------------------------------------------------------------|----------------------------------------------------------------------------------------------------------------------------------------------------------------------------------------------------------------------|-----------------------------------------------------------------------|

Footnote: <sup>a</sup> Core 'inner' circle: domain is unambiguous with an acceptable method of assessment; Middle circle: domain is important, but not feasible for all preventative trials and research studies; Outer circle: domain is important, but requires further study (research agenda) – e.g. lacks conceptual clarity or method of assessment.

**Overall health** – was re-defined as 'migraine-specific quality of life' (MSQoL), endorsed as an inner core domain for both episodic and chronic migraine (Table 4; Figure 2). Presented with evidence for generic and migraine quality of life measures, participants preferred the Migraine Functional Impact Questionnaire (MFIQ)<sup>2, 30</sup>. The four domain scores of the MFIQ address several key concepts highlighted throughout the COSMIG process – including usual activities, physical, cognitive, social, and emotional function. It also provides a global item score for usual activities.

**Pain duration** and **associated symptoms** were both judged as important, but not feasible for inclusion in all trials/research studies and placed in the middle circle (Table 4; Figure 2).

**Self-management** and **Treatment satisfaction** – were both considered important for both episodic and chronic migraine, but lack of conceptualisation and assessment supported their placement on the research agenda (outer circle) (Table 4; Figure 2).

**Cognitive function** and **Usual activities** were both rejected as independent core domains but proposed as important components of migraine-specific quality of life (Table 4).

**Adverse events** – was rejected as a core domain, with the proposition that such reporting should be part of good clinical practice guidance (Table 4; Figure 2).

The result was a two domain Core Outcome Set for both EM and CM (COSMIG) (Table 4; Figure 2):

1) *Migraine-specific pain*: intensity assessed with the 11-point NRS and frequency as the number of headache/migraine days over a specified period; and

2) *Migraine-specific quality of life* – assessed with the MFIQ<sup>30</sup>.

## Discussion

1  
2  
3 The COSMIG process has identified two core domains - pain and migraine-specific quality of life – that  
4 are recommended as part of *a priori*-designated outcomes in future preventive intervention clinical  
5 trials for both episodic and chronic migraine. Pain assessment should include both intensity measured  
6 with an 11-point NRS, and frequency assessed as the number of headache/migraine days per 28 days.  
7  
8 Migraine-specific quality of life should be assessed with the Migraine Functional Impact Questionnaire  
9 (MFIQ)<sup>30</sup>. Complex concepts around headache and migraine meant that participants in the consensus  
10 meeting were not able to make recommendations for the phrasing of questions on pain severity (e.g.,  
11 worst, average or typical) or the definition of a migraine/headache day. Thus, the specific  
12 terminologies should be defined, and reported, by the needs of individual studies. Likewise, the  
13 specific timing of assessments should be driven by the requirements of the study.  
14  
15  
16  
17  
18  
19

20  
21 Participants in the consensus meeting preferred the MFIQ over other measures of migraine-related  
22 quality of life such as the Migraine Specific Quality-of-Life Questionnaire MSQv2.1 and the 6-item  
23 Headache Impact Test (HIT-6) because participants, in particular patient participants, felt its domains  
24 best reflected the impact migraine has on people's lives. This matches the aims of the original  
25 developers who specifically sought to address gaps in existing patient reported outcomes<sup>31</sup>. A licence  
26 is needed to use the MFIQ available from [Legal@evidera.com](mailto:Legal@evidera.com). The owners advise us that it will be  
27 available free of charge for non-commercial research (email Evidera 15 May 2020, personal  
28 communication). Pain duration and associated symptoms are important but are not considered core.  
29 How to assess self-management and treatment satisfaction requires further research before  
30 recommendations can be made.  
31  
32  
33  
34  
35  
36  
37

38 Our recommendation to include a reduction in the severity (intensity) and frequency in migraine  
39 pain is further supported by a recent modified-Delphi study conducted in the US, which sought to  
40 identify outcomes for value-based contracting for migraine medications.<sup>32</sup> However, a Delphi study  
41 of experts (N=12) published after our work was completed focussed on establishing the most useful  
42 outcome measures, specifically for non-pharmacological interventions for migraine, identified the  
43 Migraine Disability Assessment (MIDAS) followed by the HIT-6 as preferred outcomes.<sup>33</sup> Our  
44 empirical work does not support this prioritisation of outcome measures,<sup>2,34</sup>  
45  
46  
47  
48  
49  
50

51 The COSMIG recommendations contrast with previous guidance for trials of prophylaxis in chronic  
52 migraine that recommend a single primary outcome derived from headache/migraine days. Patient-  
53 reported headache-related quality of life appears last in order of the secondary outcomes<sup>1</sup> and  
54 guidelines for trials of prophylaxis in episodic migraine do not include quality of life as an outcome<sup>13</sup>.  
55 Informed by current good practice guidance in core outcome set development<sup>9,14</sup>, this study included  
56 international participation from patient and professional panellists in an on-line Delphi study and a  
57  
58  
59  
60

1  
2  
3 subsequent face-to-face meeting. All data pertaining to the Delphi study were analysed both  
4 separately and combined to ensure that the views of sub-panels were clearly reported. This approach  
5 highlighted the value placed upon patient-reported outcomes such as pain and quality of life by  
6 patients and health professionals. However, discrepancies pertaining to, for example, the importance  
7 of fatigue, unpredictability, emotional impact, and cognitive function were described. Such  
8 discrepancies have been reported in other long-term musculoskeletal conditions<sup>35</sup> and more recently  
9 in a survey of health professionals and patients with COVID.<sup>36</sup> Evidence of such discrepancies is a key  
10 driver for the suggestion that patients' views are given at least equal weight to those of professionals  
11 in the process of core outcome set development.<sup>9</sup> Incorporating outcomes that have resonance to all  
12 stakeholders can enhance trial relevance, providing valued information to inform decision-making in  
13 clinical practice and health policy settings.  
14  
15  
16  
17  
18  
19  
20  
21  
22

23 Whilst individuals from 14 countries were included in the Delphi study, participants from just two  
24 countries (England and Portugal) contributed to the face-to-face meeting. However, both the Delphi  
25 process and consensus meeting sought input from credible 'experts'.<sup>17, 19</sup> For patients, expert is  
26 defined by experience of living with chronic or episodic migraine, and for health professionals by their  
27 relative expertise in migraine-related research. The wide international involvement throughout the  
28 Delphi study improved international reach and helped ensure a wider relevance of the  
29 recommendations. We note that Delphi results are obtained from inviting experts to join a panel; as  
30 this eschews sampling, no inference should be made to any larger definable population.  
31  
32  
33  
34  
35  
36  
37  
38  
39

40 Active pre-engagement with potential participants in the Delphi study enabled targeted follow-up of  
41 non-responders in round one<sup>37</sup>. We note that the participation rate of invited panellists is higher  
42 than reported in some other Delphi studies, where response rates between 30 and 40% have been  
43 reported.<sup>21</sup> Moreover, a recent international Delphi study which sought to reach agreement on  
44 outcome measures for assessing the effectiveness of non-pharmacological interventions in migraine  
45 invited just 35 eligible researchers as subject experts, and four patients.<sup>33</sup> Of the researchers, just 12  
46 agreed to participate, with 10 (28%) completing all three rounds. This suggests that the focus of our  
47 Delphi study resonated with panellists, and moreover, retention across subsequent rounds was high,  
48 with responses from both sub-panels exceeding 70%.  
49  
50  
51  
52  
53  
54

55 More people with chronic migraine than with episodic migraine participated in the Delphi study,  
56 sub-panel responses were analysed separately for both panels. Seven of the eight prioritised  
57 domains were common to both episodic and chronic migraine; self-management was unique to  
58  
59  
60

1  
2  
3 episodic migraine. However, participants in the consensus meeting agreed that whilst poor  
4 conceptualisation and lack of assessment option prevented its consideration as a core domain, self-  
5 management was important for both episodic and chronic migraine.  
6  
7

8  
9 We relied on participant self-identification of diagnosis of episodic/chronic migraine. Any  
10 misclassification is unlikely to have any substantive impact on our findings. The study included a  
11 broad age-range of patient participants. Similarly, the healthcare professionals involved had a broad  
12 spectrum of experience in the care of patients with migraine and in migraine-related research.  
13  
14

15  
16 Working collaboratively with patient research partners throughout the research contributed to the  
17 crafting of 'meaningful' domains at each stage of the Delphi process, giving validity to the proposed  
18 lists <sup>20</sup>. The initial Delphi questionnaire provided a comprehensive reflection of domains that might  
19 be assessed in chronic or episodic migraine. Additional domains were not proposed by participants  
20 in round one, supporting the comprehensiveness and relevance of content. Patient partners checked  
21 the comprehensibility and relevance of short-listed methods of assessment presented to  
22 participants in the consensus meeting, contributing to the debate and supporting lay participants  
23 during group discussions. All patient partners contributed to manuscript edits throughout the write-  
24 up phase.  
25  
26

27  
28 The recommended COSMIG core set should be complemented by additional trial outcomes  
29 pertinent to the particular intervention being evaluated<sup>37</sup>. However, standardisation of core data  
30 collection is strongly advised to reduce the potential for systematic bias and enhance the quality of  
31 patient-reported outcomes data <sup>8,9</sup>. More work is now needed on how to evaluate the self-  
32 management and treatment satisfaction domains.  
33  
34

35  
36 Through an international collaboration between patients, researchers, and health professionals, we  
37 have facilitated consensus on a Core Outcome Set for reporting on preventative intervention trials  
38 and research studies in adults with episodic or chronic MIGraine (COSMIG). We recommend that  
39 both pain (intensity and frequency) and migraine-specific quality of life are included as core  
40 domains. To support meaningful comparisons across studies, we recommend that pain intensity be  
41 assessed with a NRS <sup>29</sup> and frequency by determining the number of migraine days; migraine-specific  
42 quality of life should be assessed with the MFIQ <sup>30</sup>. The timing of assessments should be determined  
43 by individual studies.  
44  
45  
46  
47  
48  
49  
50  
51  
52  
53  
54  
55  
56  
57  
58  
59  
60

## Acknowledgements

We are very grateful to members of the International Steering Group (Richard Lipton (RL), Rigor Jensen (RJ)) and the core COSMIG group (MU, MM, Brendan Davies, RP, SPe, BB, GP, LM, RL, RJ, Viv Nichols (VN), Shilpa Patel (SPa), KS) for their oversight of the study. We are very grateful to everyone who participated in the Delphi study and attended the consensus meeting, and to Spa and VN for their expert facilitation during the consensus meeting.

## Competing interests

MU and RF are directors and shareholders of Clinvivo Ltd. MU recused himself from any discussions related to the choice of Delphi platform for this study. MU is chief investigator or co-investigator on multiple previous and current research grants from the UK National Institute for Health Research, Arthritis Research UK and is a co-investigator on grants funded by the Australian NHMRC. He is an NIHR Senior Investigator. He has received travel expenses for speaking at conferences from the professional organisations hosting the conferences. MU and RF are part of an academic partnership with Serco Ltd related to return to work initiatives. MU is a co-investigator on two NIHR funded studies receiving additional support from Stryker Ltd. He has accepted honoraria for teaching/lecturing from CARTA. He was an editor of the NIHR journal series, and a member of the NIHR Journal Editors Group, for which he received a fee.

MSM serves on the advisory board for Abbott, Allergan, Eli Lilly, Medtronic, Novartis, TEVA; has received payment for the development of educational presentations from Allergan, electroCore, Eli Lilly, Medtronic, Novartis, and TEVA; and, has received research grants from Abbott, electroCore and Medtronic

SPa is a director of Health Psychology Services Ltd which, in part, provides psychological treatments for those with chronic pain.

No other competing interests declared.

## Funding Statement

1  
2  
3 This study was funded by the National Institute for Health Research (NIHR) Programme Grants for  
4 Applied Research programme (RP-PG-1212-20018). The views expressed are those of the author(s)  
5 and not necessarily those of the NIHR or the Department of Health and Social Care.  
6  
7

8  
9 Active collaboration with our patient research partners was supported by a 'Delivering Results  
10 Award' (IAS/23022/16) from the Institute of Advanced Studies, Warwick University.  
11  
12

### 13 14 15 **Data sharing statement**

16  
17 De-identified data will be shared through the university accessible databases or repositories at  
18 Warwick University. Please contact Dr KH if additional information is required: email  
19 k.l.haywood@warwick.ac.uk  
20  
21  
22  
23  
24

### 25 26 **Authors' contribution**

27  
28 KH, MM, MU, RP, RF, RL, SPe, BB, LM and GP made substantial contributions to the conception and  
29 design of the study. KH, MM, RF, RP, RL, SPe, BB, LM, GP and MU made substantial contributions to  
30 developing the protocol. KH, MM, MU, RP, RF, RL, RB, SPe, AL, KS, BB, LM and GP made substantial  
31 contributions to the acquisition of data, analysis and interpretation of data. All authors have been  
32 involved in drafting the manuscript or revising it critically for important intellectual content; given  
33 final approval of the version to be published.  
34  
35  
36  
37  
38  
39  
40

### 41 42 **Ethics statement**

43  
44 Ethical approval was gained from Warwick Medical School Biomedical and Scientific Research Ethics  
45 Committee REGO-2017-1921  
46  
47  
48  
49  
50  
51  
52  
53  
54  
55  
56  
57  
58  
59  
60

## References

1. Tassorelli C, Diener HC, Dodick DW, et al. Guidelines of the International Headache Society for controlled trials of preventive treatment of chronic migraine in adults. *Cephalalgia : an international journal of headache* 2018; 38: 815-832. 2018/03/06. DOI: 10.1177/0333102418758283.
2. Haywood KL, Mars TS, Potter R, et al. Assessing the impact of headaches and the outcomes of treatment: A systematic review of patient-reported outcome measures (PROMs). *Cephalalgia : an international journal of headache* 2018; 38: 1374-1386. 2017/09/19. DOI: 10.1177/0333102417731348.
3. Probyn K, Bowers H, Caldwell F, et al. Prognostic factors for chronic headache: A systematic review. *Neurology* 2017; 89: 291-301. 2017/06/16. DOI: 10.1212/wnl.0000000000004112.
4. Clarke M. Standardising outcomes for clinical trials and systematic reviews. *Trials* 2007; 8: 39. DOI: 10.1186/1745-6215-8-39.
5. Kirkham JJ, Gargon E, Clarke M, et al. Can a core outcome set improve the quality of systematic reviews?--a survey of the Co-ordinating Editors of Cochrane Review Groups. *Trials* 2013; 14: 21. 2013/01/24. DOI: 10.1186/1745-6215-14-21.
6. Jackson JL, Cogbill E, Santana-Davila R, et al. A Comparative Effectiveness Meta-Analysis of Drugs for the Prophylaxis of Migraine Headache. *PLoS One* 2015; 10: e0130733. 2015/07/15. DOI: 10.1371/journal.pone.0130733.
7. Silberstein SD, Lipton RB, Dodick DW, et al. Efficacy and safety of topiramate for the treatment of chronic migraine: a randomized, double-blind, placebo-controlled trial. *Headache* 2007; 47: 170-180. 2007/02/16. DOI: 10.1111/j.1526-4610.2006.00684.x.
8. Kirkham JJ, Dwan KM, Altman DG, et al. The impact of outcome reporting bias in randomised controlled trials on a cohort of systematic reviews. *BMJ (Clinical research ed)* 2010; 340: c365. 2010/02/17. DOI: 10.1136/bmj.c365.
9. Williamson PR, Altman DG, Bagley H, et al. The COMET Handbook: version 1.0. *Trials* 2017; 18: 280. 2017/07/07. DOI: 10.1186/s13063-017-1978-4.
10. Williamson PR, Altman DG, Blazeby JM, et al. Developing core outcome sets for clinical trials: issues to consider. *Trials* 2012; 13: 132. DOI: 10.1186/1745-6215-13-132.
11. Gorst SL, Gargon E, Clarke M, et al. Choosing Important Health Outcomes for Comparative Effectiveness Research: An Updated Review and User Survey. *PLOS ONE* 2016; 11: e0146444. DOI: 10.1371/journal.pone.0146444.
12. Tunis SR, Clarke M, Gorst SL, et al. Improving the relevance and consistency of outcomes in comparative effectiveness research. *Journal of comparative effectiveness research* 2016; 5: 193-205. 2016/03/02. DOI: 10.2217/cer-2015-0007.
13. Tfelt-Hansen P, Pascual J, Ramadan N, et al. Guidelines for controlled trials of drugs in migraine: third edition. A guide for investigators. *Cephalalgia : an international journal of headache* 2012; 32: 6-38. 2012/03/03. DOI: 10.1177/0333102411417901.
14. Boers M, Kirwan JR, Wells G, et al. Developing core outcome measurement sets for clinical trials: OMERACT filter 2.0. *Journal of clinical epidemiology* 2014; 67: 745-753. 2014/03/04. DOI: 10.1016/j.jclinepi.2013.11.013.
15. Ward F, Popay J, Porroche-Escudero A, et al. Mainstreaming public involvement in a complex research collaboration: A theory-informed evaluation. 2020; n/a. DOI: 10.1111/hex.13070.



16. Nichols VP, Ellard DR, Griffiths FE, et al. The lived experience of chronic headache: a systematic review and synthesis of the qualitative literature. 2017; 7: e019929. DOI: 10.1136/bmjopen-2017-019929 %J BMJ Open.
17. Murphy MK, Black NA, Lamping DL, et al. Consensus development methods, and their use in clinical guideline development. *Health Technol Assess* 1998; 2: i-iv, 1-88. 1998/04/30.
18. Helmer O and Dalkey N. An experimental application of the Delphi Method to the use of experts. *The Rand Corporation Memorandum RM 727/1 – Abridged July 2961*, 1962.
19. Fink A, Kosecoff J, Chassin M, et al. Consensus methods: characteristics and guidelines for use. *Am J Public Health* 1984; 74: 979-983. 1984/09/01. DOI: 10.2105/ajph.74.9.979.
20. Orbai AM, de Wit M, Mease P, et al. International patient and physician consensus on a psoriatic arthritis core outcome set for clinical trials. *Annals of the rheumatic diseases* 2017; 76: 673-680. 2016/09/11. DOI: 10.1136/annrheumdis-2016-210242.
21. Prinsen CAC, Vohra S, Rose MR, et al. How to select outcome measurement instruments for outcomes included in a “Core Outcome Set” – a practical guideline. *Trials* 2016; 17: 449. DOI: 10.1186/s13063-016-1555-2.
22. International Headache Society. ICHD / Guidelines, <http://www.ihf-headache.org/ichd-guidelines> (April 2020).
23. The National Institute of Neurological Disorders and Stroke (NINDS). Common Data Standards - Headache, <https://www.commondataelements.ninds.nih.gov/headache> (accessed 01/04/2020).
24. Dworkin RH, Turk DC, Farrar JT, et al. Core outcome measures for chronic pain clinical trials: IMMPACT recommendations. *Pain* 2005; 113: 9-19. 2004/12/29. DOI: 10.1016/j.pain.2004.09.012.
25. Turk DC, Dworkin RH, Allen RR, et al. Core outcome domains for chronic pain clinical trials: IMMPACT recommendations. *Pain* 2003; 106: 337-345. 2003/12/09. DOI: 10.1016/j.pain.2003.08.001.
26. IMMPACT. Initiative on Methods, Measurement, and Pain Assessment in Clinical Trials, <http://www.immpact.org/> (accessed April 2020).
27. Tugwell P, Boers M, Brooks P, et al. OMERACT: an international initiative to improve outcome measurement in rheumatology. *Trials* 2007; 8: 38. 2007/11/28. DOI: 10.1186/1745-6215-8-38.
28. Institute NC. Common Terminology Criteria for Adverse Events (CTCAE), [https://ctep.cancer.gov/protocoldevelopment/electronic\\_applications/ctc.htm](https://ctep.cancer.gov/protocoldevelopment/electronic_applications/ctc.htm) (accessed April 2020).
29. Hjermstad MJ, Fayers PM, Haugen DF, et al. Studies comparing Numerical Rating Scales, Verbal Rating Scales, and Visual Analogue Scales for assessment of pain intensity in adults: a systematic literature review. *Journal of pain and symptom management* 2011; 41: 1073-1093. 2011/05/31. DOI: 10.1016/j.jpainsymman.2010.08.016.
30. Hareendran A, Skalicky A, Mannix S, et al. Development of a New Tool for Evaluating the Benefit of Preventive Treatments for Migraine on Functional Outcomes – The Migraine Functional Impact Questionnaire (MFIQ). 2018; 58: 1612-1628. DOI: 10.1111/head.13420.
31. Kawata AK, Hareendran A, Shaffer S, et al. Evaluating the Psychometric Properties of the Migraine Functional Impact Questionnaire (MFIQ). *Headache* 2019; 59: 1253-1269. 2019/06/07. DOI: 10.1111/head.13569.
32. Swart ECS, Good CB, Henderson R, et al. Identifying Outcome Measures for Migraine Value-Based Contracting Using the Delphi Method. *Headache* 2020; 60: 2139-2151. 2020/10/01. DOI: 10.1111/head.13978.



- 1  
2  
3 33. Luedtke K, Basener A, Bedei S, et al. Outcome measures for assessing the  
4 effectiveness of non-pharmacological interventions in frequent episodic or chronic migraine:  
5 a Delphi study. *BMJ Open* 2020; 10: e029855. DOI: 10.1136/bmjopen-2019-029855.  
6  
7 34. Haywood KL AF, Nichols V, Pearce G, Box B, Muldoon L, Patel S, Griffiths F,  
8 Stewart K, Underwood M, Matharu M,. Measuring health-related quality of life in chronic  
9 headache: a comparative evaluation of the Chronic Headache Quality of Life Questionnaire  
10 and Headache Impact Test (HIT-6). *Cephalalgia : an international journal of headache* 2021.  
11 DOI: 10.1177/03331024211006045.  
12  
13 35. Staniszewska S, Haywood KL, Brett J, et al. Patient and public involvement in  
14 patient-reported outcome measures: evolution not revolution. *Patient* 2012; 5: 79-87.  
15 2012/03/21. DOI: 10.2165/11597150-000000000-00000.  
16  
17 36. Evangelidis N, Tong A, Howell M, et al. International Survey to Establish Prioritized  
18 Outcomes for Trials in People With Coronavirus Disease 2019. *Crit Care Med* 2020; 48:  
19 1612-1621. 2020/08/18. DOI: 10.1097/ccm.0000000000004584.  
20  
21 37. Gargon E, Gorst SL and Williamson PR. Choosing important health outcomes for  
22 comparative effectiveness research: 5th annual update to a systematic review of core outcome  
23 sets for research. *PloS one* 2019; 14: e0225980-e0225980. DOI:  
24 10.1371/journal.pone.0225980.  
25  
26  
27  
28  
29  
30  
31  
32  
33  
34  
35  
36  
37  
38  
39  
40  
41  
42  
43  
44  
45  
46  
47  
48  
49  
50  
51  
52  
53  
54  
55  
56  
57  
58  
59  
60

Figure 1: Flow diagram outlining the development stages for the COSMIG

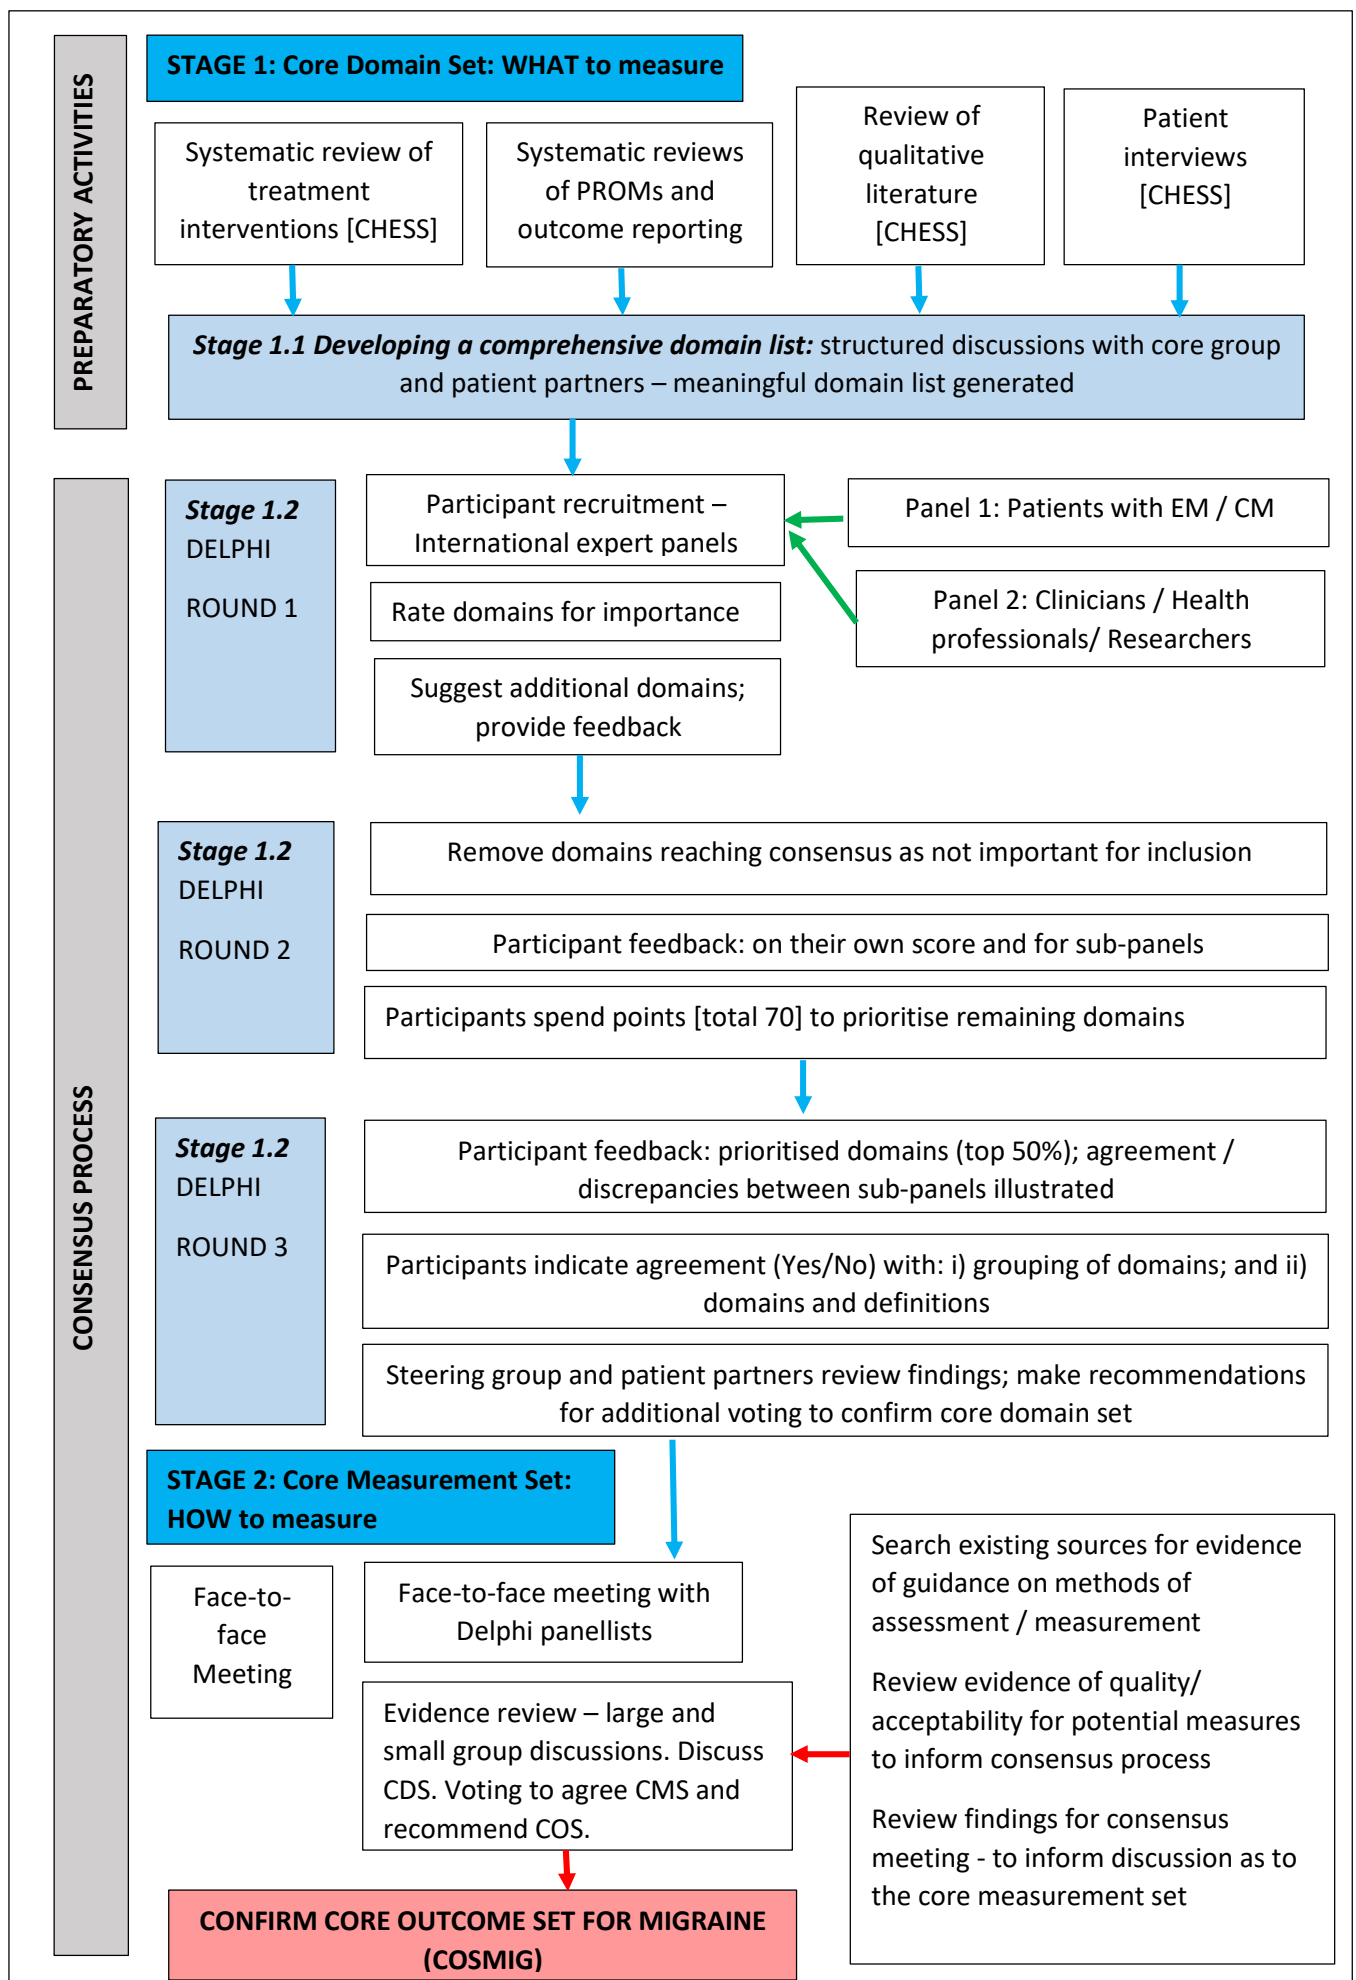

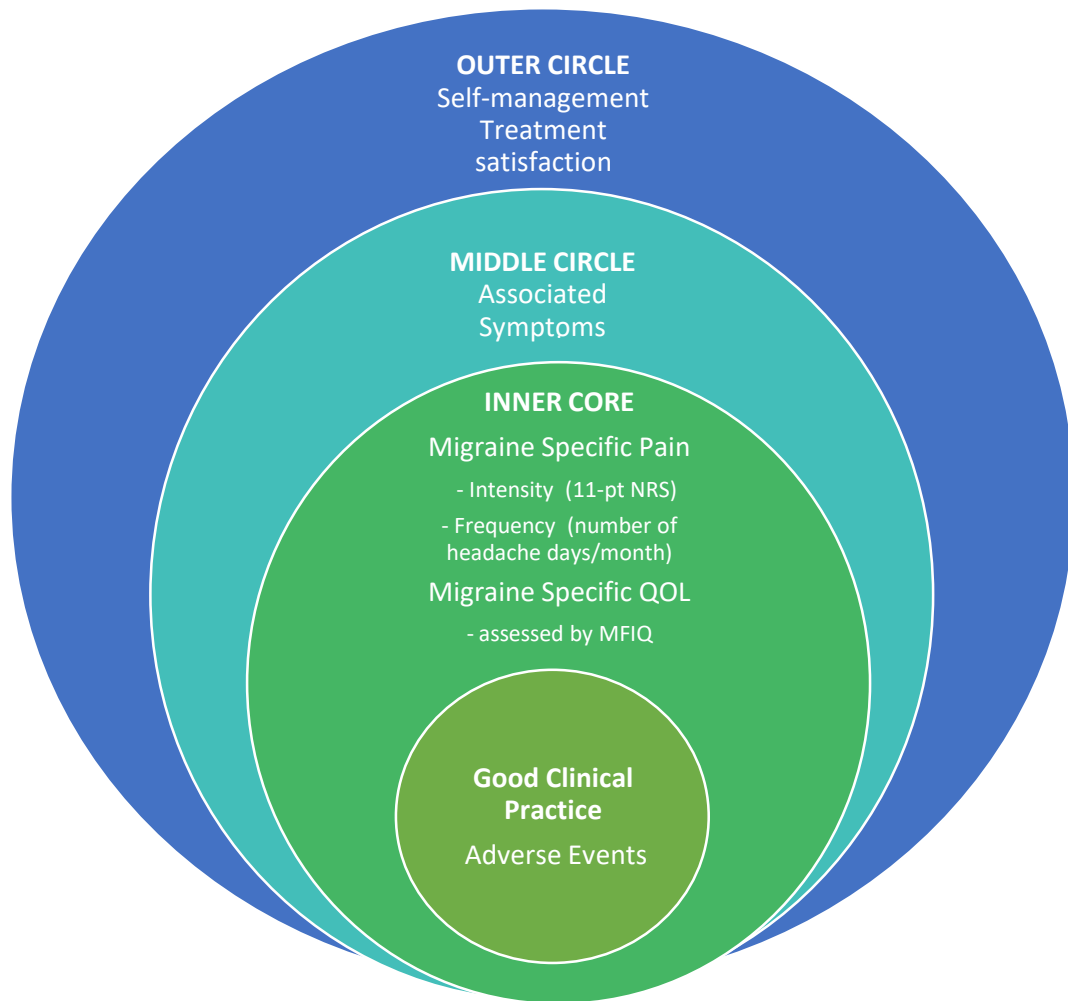

**Figure 2. The Core Outcome Set for Episodic and Chronic Migraine (COSMIG):**

*Footnote: Core 'inner' circle: domain is unambiguous with an acceptable method of assessment;*

*Middle circle: domain is important, but not feasible for all preventative trials and research studies;*

*Outer circle: domain is important, but requires further study (research agenda).*

## APPENDIX

Appendix Table 1. Bespoke grading system to illustrate where consensus was achieved in the Delphi Round 1 for reviewed domains.

| Grade       | Level of agreement between panel                                                                                                | Decision rule                                                                                                                 |
|-------------|---------------------------------------------------------------------------------------------------------------------------------|-------------------------------------------------------------------------------------------------------------------------------|
| <b>A **</b> | If in both panels the median rating is 9                                                                                        | Include domain in Round 2                                                                                                     |
| <b>A*</b>   | If in both panels $\geq 70\%$ rate a domain $\geq 7$                                                                            | Include domain in Round 2                                                                                                     |
| <b>A</b>    | If in both panels the median domain rating is $\geq 7$                                                                          | Include domain in Round 2 if either panel achieves a median score of 9 OR qualitative evidence supports further consideration |
| <b>B</b>    | If the median rating for a domain is $\geq 7$ in only one panel                                                                 | Include domain in Round 2 if either panel achieves a median score of 9 OR qualitative evidence supports further consideration |
| <b>C</b>    | If the median rating for the two panels combined is $\geq 4$ and $\leq 6$ and the median rating for no single panel is $\leq 7$ | No progression to Round 2 (unless qualitative evidence supports further consideration)                                        |
| <b>D</b>    | If the median rating for the two panels combined is $\geq 1$ and $\leq 3$ and the median rating for no single panel is $\leq 7$ | No progression to Round 2 (unless qualitative evidence supports further consideration)                                        |

Footnote: 'both panels' refers to – patient panel and professionals panel

1  
2  
3  
4  
5  
6  
7  
8  
9  
10  
11  
12  
13  
14  
15  
16  
17  
18  
19  
20  
21  
22  
23  
24  
25  
26  
27  
28  
29  
30  
31  
32  
33  
34  
35  
36  
37  
38  
39  
40  
41  
42  
43  
44  
45  
46

Appendix Table 2. Background of professional participants (expert panel) in the Delphi process (Round 1).

|                                          | Chronic round | Episodic round |
|------------------------------------------|---------------|----------------|
| Clinician                                | 6             | 5              |
| Neurologist                              | 13            | 12             |
| Neurologist specialist interest headache | 10            | 11             |
| GP specialist interest headache          | 1             | 0              |
| Nurse specialist                         | 4             | 3              |
| Chiro/osteopath/                         | 2             | 1              |
| Health Economist                         | 2             | 1              |
| Clinical Academic                        | 8             | 9              |
| Other health professional academic       | 2             | 0              |
| Clinical Trialist                        | 9             | 8              |
| Systematic reviewer                      | 6             | 5              |
| Measurement expert                       | 7             | 8              |

Footnote: participants could identify as having more than one background

Appendix Table 3. Delphi Round 3: results of voting on sub-panel discrepancies.

| Outcome to be voted on (R3)                                            |                                                                                                                       |    | EPISODIC MIGRAINE<br><i>Voting</i> |                |                    | CHRONIC MIGRAINE<br><i>Voting</i> |                |                    |
|------------------------------------------------------------------------|-----------------------------------------------------------------------------------------------------------------------|----|------------------------------------|----------------|--------------------|-----------------------------------|----------------|--------------------|
| Discrepancies<br>(outcomes rated in top 50% by one sub-panel)          | Proposed Domain and definition                                                                                        | Q  | Patient<br>(n=23)                  | HCPs<br>(n=21) | Combined<br>(n=44) | Patient<br>(n=29)                 | HCPs<br>(n=23) | Combined<br>(n=52) |
| <i>Ranked highly by healthcare professionals (HCPs)</i>                |                                                                                                                       |    |                                    |                |                    |                                   |                |                    |
| • HCP 9/27; Patients 20/27 (EM)                                        | • <b>Satisfaction with Treatment</b>                                                                                  | a. | 65.2%                              | <b>71.4%</b>   | 68.2%              | -                                 | -              | -                  |
| • HCP 8/27; Patients 25/27 (EM)                                        | • <b>Vomiting and/ feelings of nausea</b>                                                                             | a. | 60.9%                              | <b>71.4%</b>   | 65.9%              | -                                 | -              | -                  |
| • HCP 12/27; Patients 18/27 (EM)                                       | • Type (potency) and dose (how much) of a medication when experiencing a migraine                                     | a. |                                    |                |                    | -                                 | -              | -                  |
| • HCP 10/31; Patients 20/31 (CM)                                       | • Stress – feelings of distress, frustration or irritation                                                            | a. | -                                  | -              | -                  | 58.6%                             | 47.8%          | 53.9%              |
| • HCP 15/31; Patients 29/31 (CM)                                       | • Mortality (death)                                                                                                   | a. | -                                  | -              | -                  | 20.7%                             | 17.4%          | 19.2%              |
| <i>Ranked highly by patients</i>                                       |                                                                                                                       |    |                                    |                |                    |                                   |                |                    |
| • Patients 10/27; HCPs 21/27 (EM)<br>• Patients 14/31; HCPs 31/31 (CM) | • <b>Unpredictability of a migraine – uncertainty of being symptom-free or able to engage in activities</b>           | a. | <b>82.6%</b>                       | 61.9%          | <b>72.7%</b>       | <b>96.6%</b>                      | <b>69.6%</b>   | <b>84.6%</b>       |
| • Patients 11/27; HCPs 23/27 (EM)                                      | • <b>Physical fatigue – experiencing physical fatigue, tiredness, lacking in energy, feeling physically exhausted</b> | a. | <b>69.6%</b>                       | 52.4%          | 61.4%              | -                                 | -              | -                  |
| • Patients 10/27; HCPs 21/27 (EM)                                      | • <b>Depressive mood – feeling sad, feeling down, feeling sorry for oneself, or feeling depressed</b>                 | a. | <b>69.6%</b>                       | 42.9%          | 56.8%              | -                                 | -              | -                  |

Footnote: Panellists were asked to indicate (Yes/No): a. Should the following outcomes be included in a core set for studies of EM / CM (respectively)?

## COS-START CHECKLIST – FOR COSMIG

| SECTION/TOPIC             | ITEM NO. | CHECKLIST ITEM                                                                                                                                                                                                  | MANUSCRIPT PAGE                          |
|---------------------------|----------|-----------------------------------------------------------------------------------------------------------------------------------------------------------------------------------------------------------------|------------------------------------------|
| <b>TITLE / ABSTRACT</b>   |          |                                                                                                                                                                                                                 |                                          |
| Title                     | 1a       | Identify in the title that the paper reports development of a COS                                                                                                                                               | Title: p1                                |
| Abstract                  | 1b       | Provide a structured summary                                                                                                                                                                                    | Abstract: p2                             |
| <b>INTRODUCTION</b>       |          |                                                                                                                                                                                                                 |                                          |
| Background and Objectives | 2a       | Describe the background and explain the rationale for developing the COS                                                                                                                                        | Background: p3                           |
|                           | 2b       | Describe the specific objectives with reference to developing a COS                                                                                                                                             | Background: p3                           |
| Scope                     | 3a       | Describe the health condition(s) and population(s) covered by the COS                                                                                                                                           | Background: p3                           |
|                           | 3b       | Describe the intervention(s) covered by the COS                                                                                                                                                                 | Background: p3                           |
|                           | 3c       | Describe the setting(s) in which the COS is to be applied                                                                                                                                                       | Background: p3                           |
| <b>METHODS</b>            |          |                                                                                                                                                                                                                 |                                          |
| Protocol / Registry entry | 4        | Indicate where the COS development protocol can be accessed, if available, and /or the study registration details                                                                                               | COMET registration p4                    |
| Participants              | 5        | Describe the rationale for stakeholder groups involved in the COS development process, eligibility criteria for participants from each group, and a description of how the individuals involved were identified | Methods: p4 (Stage 1.2)                  |
| Information sources       | 6a       | Describe the information sources used to identify an initial list of outcomes                                                                                                                                   | Methods: p4 (Stage 1.1)                  |
|                           | 6b       | Describe how outcomes were dropped / combined, with reasons (if applicable)                                                                                                                                     | Methods: p4-5 (Stage 1.2);               |
| Consensus process         | 7        | Describe how the consensus process was undertaken                                                                                                                                                               | Methods: p4-5 (Stage 1.2); 7 (Stage 1.3) |
| Outcome scoring           | 8        | Describe how outcomes were scored and how scores were summarised                                                                                                                                                | Methods: p4-5 (Stage 1.2); 7 (Stage 1.3) |
| Consensus definition      | 9a       | Describe the consensus definition                                                                                                                                                                               | Methods: p4-5 (Stage 1.2); 7 (Stage 1.3) |
|                           | 9b       | Describe the procedure for determining how outcomes were included or excluded from consideration during the consensus process                                                                                   | Methods: p4-5 (Stage 1.2); 7 (Stage 1.3) |
| Ethics and consent        | 10       | Provide a statement regarding the ethics and consent issues for the study                                                                                                                                       | Methods: p4                              |
| <b>RESULTS</b>            |          |                                                                                                                                                                                                                 |                                          |

|                          |     |                                                                                                                                 |                                           |
|--------------------------|-----|---------------------------------------------------------------------------------------------------------------------------------|-------------------------------------------|
| Protocol deviations      | 11  | Describe any changes from the protocol (if applicable), with reasons, and describe the impact these changes have on the results | N/A                                       |
| Participants             | 12  | Present data on the number and relevant characteristics of the people involved at all stages of COS development                 | Results: p7-10.                           |
| Outcomes                 | 13a | List all outcomes considered at the start of the consensus process                                                              | Table 1.                                  |
|                          | 13b | Describe any new outcomes introduced and any outcomes dropped, with reasons, during the consensus process                       | Results: p7-10; Tables 1, 2a, 2b, 3, 4, 5 |
| COS                      | 14  | List the outcomes in the final COS                                                                                              | Results: p 11; Table 5; Figure 1.         |
| <b>DISCUSSION</b>        |     |                                                                                                                                 |                                           |
| Limitations              | 15  | Discuss any limitations in the COS development process                                                                          | Discussion: p12                           |
| Conclusions              | 16  | Provide an interpretation of the final COS in the context of other evidence, and implications for future research               | Discussion: p11-12                        |
| <b>OTHER INFORMATION</b> |     |                                                                                                                                 |                                           |
| Funding                  | 17  | Describe sources of funding / role of funders                                                                                   | Funding statement: p15                    |
| Conflicts of interest    | 18  | Describe any conflicts of interest within the study team and how these were managed                                             | Competing interests: p14                  |
