# Supplementary material for: Core outcome set for preventive intervention trials in chronic and episodic migraine (COSMIG): an international, consensus-derived and multistakeholder initiative
Source: PubMed Central journal article supplement (PMC8634270; doi:10.1136/bmjopen-2020-043242), 2021-11-30
Supplement: bmjopen-2020-043242supp001.pdf [file bmjopen-2020-043242supp001.pdf]

## APPENDIX

Appendix Table 1. Bespoke grading system to illustrate where consensus was achieved in the Delphi Round 1 for reviewed domains.

| Grade       | Level of agreement between panel                                                                                                | Decision rule                                                                                                                 |
|-------------|---------------------------------------------------------------------------------------------------------------------------------|-------------------------------------------------------------------------------------------------------------------------------|
| <b>A **</b> | If in both panels the median rating is 9                                                                                        | Include domain in Round 2                                                                                                     |
| <b>A*</b>   | If in both panels $\geq 70\%$ rate a domain $\geq 7$                                                                            | Include domain in Round 2                                                                                                     |
| <b>A</b>    | If in both panels the median domain rating is $\geq 7$                                                                          | Include domain in Round 2 if either panel achieves a median score of 9 OR qualitative evidence supports further consideration |
| <b>B</b>    | If the median rating for a domain is $\geq 7$ in only one panel                                                                 | Include domain in Round 2 if either panel achieves a median score of 9 OR qualitative evidence supports further consideration |
| <b>C</b>    | If the median rating for the two panels combined is $\geq 4$ and $\leq 6$ and the median rating for no single panel is $\leq 7$ | No progression to Round 2 (unless qualitative evidence supports further consideration)                                        |
| <b>D</b>    | If the median rating for the two panels combined is $\geq 1$ and $\leq 3$ and the median rating for no single panel is $\leq 7$ | No progression to Round 2 (unless qualitative evidence supports further consideration)                                        |

Footnote: 'both panels' refers to – patient panel and professionals panel

Appendix Table 2. Background of professional participants (expert panel) in the Delphi process (Round 1).

|                                          | Chronic round | Episodic round |
|------------------------------------------|---------------|----------------|
| Clinician                                | 6             | 5              |
| Neurologist                              | 13            | 12             |
| Neurologist specialist interest headache | 10            | 11             |
| GP specialist interest headache          | 1             | 0              |
| Nurse specialist                         | 4             | 3              |
| Chiro/osteopath/                         | 2             | 1              |
| Health Economist                         | 2             | 1              |
| Clinical Academic                        | 8             | 9              |
| Other health professional academic       | 2             | 0              |
| Clinical Trialist                        | 9             | 8              |
| Systematic reviewer                      | 6             | 5              |
| Measurement expert                       | 7             | 8              |

Footnote: participants could identify as having more than one background

Appendix Table 3. Delphi Round 3: results of voting on sub-panel discrepancies.

| Outcome to be voted on (R3)                                            |                                                                                                                       |    | EPISODIC MIGRAINE<br><i>Voting</i> |                |                    | CHRONIC MIGRAINE<br><i>Voting</i> |                |                    |
|------------------------------------------------------------------------|-----------------------------------------------------------------------------------------------------------------------|----|------------------------------------|----------------|--------------------|-----------------------------------|----------------|--------------------|
| Discrepancies<br>(outcomes rated in top 50% by one sub-panel)          | Proposed Domain and definition                                                                                        | Q  | Patient<br>(n=23)                  | HCPs<br>(n=21) | Combined<br>(n=44) | Patient<br>(n=29)                 | HCPs<br>(n=23) | Combined<br>(n=52) |
| <i>Ranked highly by healthcare professionals (HCPs)</i>                |                                                                                                                       |    |                                    |                |                    |                                   |                |                    |
| • HCP 9/27; Patients 20/27 (EM)                                        | • <b>Satisfaction with Treatment</b>                                                                                  | a. | 65.2%                              | <b>71.4%</b>   | 68.2%              | -                                 | -              | -                  |
| • HCP 8/27; Patients 25/27 (EM)                                        | • <b>Vomiting and/ feelings of nausea</b>                                                                             | a. | 60.9%                              | <b>71.4%</b>   | 65.9%              | -                                 | -              | -                  |
| • HCP 12/27; Patients 18/27 (EM)                                       | • Type (potency) and dose (how much) of a medication when experiencing a migraine                                     | a. |                                    |                |                    | -                                 | -              | -                  |
| • HCP 10/31; Patients 20/31 (CM)                                       | • Stress – feelings of distress, frustration or irritation                                                            | a. | -                                  | -              | -                  | 58.6%                             | 47.8%          | 53.9%              |
| • HCP 15/31; Patients 29/31 (CM)                                       | • Mortality (death)                                                                                                   | a. | -                                  | -              | -                  | 20.7%                             | 17.4%          | 19.2%              |
| <i>Ranked highly by patients</i>                                       |                                                                                                                       |    |                                    |                |                    |                                   |                |                    |
| • Patients 10/27; HCPs 21/27 (EM)<br>• Patients 14/31; HCPs 31/31 (CM) | • <b>Unpredictability of a migraine – uncertainty of being symptom-free or able to engage in activities</b>           | a. | <b>82.6%</b>                       | 61.9%          | <b>72.7%</b>       | <b>96.6%</b>                      | <b>69.6%</b>   | <b>84.6%</b>       |
| • Patients 11/27; HCPs 23/27 (EM)                                      | • <b>Physical fatigue – experiencing physical fatigue, tiredness, lacking in energy, feeling physically exhausted</b> | a. | <b>69.6%</b>                       | 52.4%          | 61.4%              | -                                 | -              | -                  |
| • Patients 10/27; HCPs 21/27 (EM)                                      | • <b>Depressive mood – feeling sad, feeling down, feeling sorry for oneself, or feeling depressed</b>                 | a. | <b>69.6%</b>                       | 42.9%          | 56.8%              | -                                 | -              | -                  |

Footnote: Panellists were asked to indicate (Yes/No): a. Should the following outcomes be included in a core set for studies of EM / CM (respectively)?
